# Supplementary material
Source: ML conference proceedings conference paper supplement (https://openreview.net/forum?id=xiQNfYl33p)
Supplement: supplementary_material [file ACSEducation__False.xlsx]

## Sheet: Sheet1
		stats
	cp_method	aps								tps
	type	base				ours				base				ours
	stat_type	eff_mean	eff_std	violation_mean	violation_std	eff_mean	eff_std	violation_mean	violation_std	eff_mean	eff_std	violation_mean	violation_std	eff_mean	eff_std	violation_mean	violation_std
c	fairness_metric
0.05	Demographic_Parity	2.9816	0.0018	0.4578	0.0022	5.9217	0.0139	0.0455	0.0081	2.8275	0.003	0.4855	0.0025	5.946	0.0021	0.0497	0.0025
	Equal_Opportunity	2.9816	0.0018	0.4356	0.0551	6	0	0	0	2.8275	0.003	0.4062	0.0604	6	0	0	0
	Equalized_Odds	2.9816	0.0018	0.4654	0.0233	6	0	0	0	2.8275	0.003	0.4845	0.0034	6	0	0	0
	Overall_Acc_Equality	2.9816	0.0018	0.0732	0.008	3.9989	0.212	0.0494	0.0089	2.8275	0.003	0.0966	0.0051	3.6219	0.1939	0.0505	0.0113
	Predictive_Equality	2.9816	0.0018	0.4515	0.003	5.9186	0.0123	0.0469	0.008	2.8275	0.003	0.4845	0.0034	5.9476	0.0023	0.049	0.0029
	Predictive_Parity	2.982	0.0025	0.4486	0.1944	5.1847	0.071	0.0439	0.0119	2.8275	0.003	0.3188	0.1	4.551	0.0955	0.0377	0.0089
0.1	Demographic_Parity	2.9816	0.0018	0.4578	0.0022	5.828	0.0258	0.0923	0.0159	2.8275	0.003	0.4855	0.0025	5.861	0.0034	0.0984	0.0033
	Equal_Opportunity	2.9816	0.0018	0.4356	0.0551	6	0	0	0	2.8275	0.003	0.4062	0.0604	6	0	0	0
	Equalized_Odds	2.982	0.0025	0.4845	0.0469	6	0	0	0	2.8275	0.003	0.4845	0.0034	6	0	0	0
	Overall_Acc_Equality	2.9816	0.0018	0.0732	0.008	2.9816	0.0018	0.0732	0.008	2.8275	0.003	0.0966	0.0051	2.868	0.0443	0.0937	0.0073
	Predictive_Equality	2.9816	0.0018	0.4515	0.003	5.823	0.0217	0.0933	0.0154	2.8275	0.003	0.4845	0.0034	5.8626	0.0039	0.0991	0.0032
	Predictive_Parity	2.9824	0.0021	0.3812	0.0806	3.9749	0.0719	0.0933	0.0196	2.8275	0.003	0.3188	0.1	3.7608	0.1055	0.0913	0.0137
0.15	Demographic_Parity	2.9816	0.0018	0.4578	0.0022	5.7259	0.0231	0.1464	0.0134	2.8275	0.003	0.4855	0.0025	5.7881	0.0047	0.1462	0.0047
	Equal_Opportunity	2.9816	0.0018	0.4356	0.0551	5.7789	0.0797	0.1623	0.0196	2.8275	0.003	0.4062	0.0604	4.8711	0.1597	0.1459	0.0663
	Equalized_Odds	2.9824	0.0021	0.4851	0.0502	5.8077	0.08	0.1445	0.0767	2.8275	0.003	0.4845	0.0034	5.7891	0.0049	0.1473	0.0051
	Overall_Acc_Equality	2.9816	0.0018	0.0732	0.008	2.9816	0.0018	0.0732	0.008	2.8275	0.003	0.0966	0.0051	2.8275	0.003	0.0966	0.0051
	Predictive_Equality	2.9816	0.0018	0.4515	0.003	5.7149	0.0172	0.1501	0.0151	2.8275	0.003	0.4845	0.0034	5.7891	0.0049	0.1473	0.0051
	Predictive_Parity	2.9832	0.002	0.406	0.1226	3.4986	0.089	0.1521	0.0523	2.8275	0.003	0.3188	0.1	3.3477	0.1176	0.1665	0.0686
0.2	Demographic_Parity	2.9816	0.0018	0.4578	0.0022	5.6231	0.0215	0.1987	0.0196	2.8275	0.003	0.4855	0.0025	5.6988	0.0093	0.195	0.0055
	Equal_Opportunity	2.9816	0.0018	0.4356	0.0551	5.7322	0.1171	0.1914	0.0311	2.8275	0.003	0.4062	0.0604	4.7907	0.1981	0.176	0.08
	Equalized_Odds	2.9832	0.002	0.4716	0.0281	5.7228	0.1177	0.1767	0.0668	2.8275	0.003	0.4845	0.0034	5.7031	0.0071	0.1953	0.0055
	Overall_Acc_Equality	2.9816	0.0018	0.0732	0.008	2.9816	0.0018	0.0732	0.008	2.8275	0.003	0.0966	0.0051	2.8275	0.003	0.0966	0.0051
	Predictive_Equality	2.9816	0.0018	0.4515	0.003	5.6096	0.0239	0.1993	0.0184	2.8275	0.003	0.4845	0.0034	5.7031	0.0071	0.1953	0.0055
	Predictive_Parity	2.9817	0.0025	0.4098	0.137	3.3742	0.1762	0.166	0.0453	2.8275	0.003	0.3188	0.1	3.2103	0.1502	0.1989	0.094
0.8	Disparate_Impact	2.9816	0.0018	0.0106	0.0038	5.6618	0.0141	0.7993	0.0173	2.8275	0.003	0.0187	0.0042	5.7045	0.007	0.8038	0.0041
