# Supplementary material
Source: ML conference proceedings conference paper supplement (https://openreview.net/forum?id=xiQNfYl33p)
Supplement: supplementary_material [file ACSEducation__True.xlsx]

## Sheet: Sheet1
		stats
	cp_method	aps								tps
	type	base				ours				base				ours
	stat_type	eff_mean	eff_std	violation_mean	violation_std	eff_mean	eff_std	violation_mean	violation_std	eff_mean	eff_std	violation_mean	violation_std	eff_mean	eff_std	violation_mean	violation_std
c	fairness_metric
0.05	Demographic_Parity	2.9816	0.0018	0.4578	0.0022	4.6179	0.5057	0.0604	0.0121	2.8275	0.003	0.4855	0.0025	4.067	0.0019	0.0516	0.0021
	Equal_Opportunity	2.9816	0.0018	0.4356	0.0551	4.9952	0.055	0.0437	0.0129	2.8275	0.003	0.4062	0.0604	4.7913	0.0241	0.0486	0.0136
	Equalized_Odds	2.9816	0.0018	0.4654	0.0233	5.1854	0.0034	0.0536	0.0042	2.8275	0.003	0.4845	0.0034	5.1518	0.0006	0.05	0.0016
	Overall_Acc_Equality	2.9816	0.0018	0.0732	0.008	3.1983	0.0576	0.06	0.0067	2.8275	0.003	0.0966	0.0051	2.9983	0.0466	0.0749	0.0061
	Predictive_Equality	2.9816	0.0018	0.4515	0.003	4.4324	0.4594	0.0626	0.013	2.8275	0.003	0.4845	0.0034	4.0787	0.007	0.0528	0.0033
	Predictive_Parity	2.982	0.0025	0.4486	0.1944	3.6623	0.0756	0.0612	0.0204	2.8275	0.003	0.3188	0.1	3.6616	0.0748	0.0587	0.0195
0.1	Demographic_Parity	2.9816	0.0018	0.4578	0.0022	4.0465	0.0103	0.1082	0.0169	2.8275	0.003	0.4855	0.0025	4.0022	0.0027	0.102	0.0037
	Equal_Opportunity	2.9816	0.0018	0.4356	0.0551	4.6721	0.0291	0.1221	0.0223	2.8275	0.003	0.4062	0.0604	4.2356	0.0425	0.117	0.0387
	Equalized_Odds	2.982	0.0025	0.4845	0.0469	5.0602	0.0176	0.1191	0.0202	2.8275	0.003	0.4845	0.0034	5.0189	0.0031	0.1027	0.0035
	Overall_Acc_Equality	2.9816	0.0018	0.0732	0.008	2.9816	0.0018	0.0732	0.008	2.8275	0.003	0.0966	0.0051	2.8347	0.0087	0.0946	0.0074
	Predictive_Equality	2.9816	0.0018	0.4515	0.003	4.0486	0.0098	0.1068	0.0163	2.8275	0.003	0.4845	0.0034	4.0096	0.0024	0.1023	0.004
	Predictive_Parity	2.9824	0.0021	0.3812	0.0806	3.2356	0.0815	0.1139	0.0357	2.8275	0.003	0.3188	0.1	3.0606	0.0237	0.1334	0.0768
0.15	Demographic_Parity	2.9816	0.0018	0.4578	0.0022	3.9587	0.0125	0.1602	0.0152	2.8275	0.003	0.4855	0.0025	3.9364	0.0029	0.153	0.0044
	Equal_Opportunity	2.9816	0.0018	0.4356	0.0551	4.2015	0.436	0.1918	0.0514	2.8275	0.003	0.4062	0.0604	3.4217	0.2739	0.1919	0.0743
	Equalized_Odds	2.9824	0.0021	0.4851	0.0502	4.6067	0.4311	0.219	0.0623	2.8275	0.003	0.4845	0.0034	4.2258	0.4411	0.1627	0.0199
	Overall_Acc_Equality	2.9816	0.0018	0.0732	0.008	2.9816	0.0018	0.0732	0.008	2.8275	0.003	0.0966	0.0051	2.8275	0.003	0.0966	0.0051
	Predictive_Equality	2.9816	0.0018	0.4515	0.003	3.9547	0.0087	0.164	0.0166	2.8275	0.003	0.4845	0.0034	3.9523	0.0032	0.1539	0.0057
	Predictive_Parity	2.9832	0.002	0.406	0.1226	3.0486	0.0349	0.1817	0.0551	2.8275	0.003	0.3188	0.1	2.8799	0.0321	0.182	0.06
0.2	Demographic_Parity	2.9816	0.0018	0.4578	0.0022	3.8696	0.0102	0.2133	0.0144	2.8275	0.003	0.4855	0.0025	3.8574	0.0026	0.2035	0.0045
	Equal_Opportunity	2.9816	0.0018	0.4356	0.0551	3.8458	0.4282	0.2603	0.0966	2.8275	0.003	0.4062	0.0604	3.214	0.0776	0.246	0.1058
	Equalized_Odds	2.9832	0.002	0.4716	0.0281	3.8938	0.0516	0.2241	0.0203	2.8275	0.003	0.4845	0.0034	3.8839	0.0034	0.2035	0.0055
	Overall_Acc_Equality	2.9816	0.0018	0.0732	0.008	2.9816	0.0018	0.0732	0.008	2.8275	0.003	0.0966	0.0051	2.8275	0.003	0.0966	0.0051
	Predictive_Equality	2.9816	0.0018	0.4515	0.003	3.873	0.0109	0.212	0.0144	2.8275	0.003	0.4845	0.0034	3.8839	0.0034	0.2029	0.0047
	Predictive_Parity	2.9817	0.0025	0.4098	0.137	3.0082	0.0142	0.1801	0.0332	2.8275	0.003	0.3188	0.1	2.8447	0.0117	0.2071	0.0882
0.8	Disparate_Impact	2.9816	0.0018	0.0106	0.0038	4.7274	0.0108	0.7808	0.0121	2.8275	0.003	0.0187	0.0042	4.7438	0.0038	0.7971	0.0041
