# Supplementary material
Source: ML conference proceedings conference paper supplement (https://openreview.net/forum?id=xiQNfYl33p)
Supplement: supplementary_material [file ACSIncome__False.xlsx]

## Sheet: Sheet1
		stats
	cp_method	aps								tps
	type	base				ours				base				ours
	stat_type	eff_mean	eff_std	violation_mean	violation_std	eff_mean	eff_std	violation_mean	violation_std	eff_mean	eff_std	violation_mean	violation_std	eff_mean	eff_std	violation_mean	violation_std
c	fairness_metric
0.05	Demographic_Parity	2.2124	0.0021	0.3273	0.0031	3.877	0.0273	0.0485	0.0125	2.1092	0.0015	0.3379	0.0019	3.9191	0.0067	0.0473	0.0046
	Equal_Opportunity	2.2124	0.0021	0.2258	0.0278	3.8813	0.0941	0.0222	0.0178	2.1092	0.0015	0.2468	0.019	3.5113	0.1575	0.0308	0.0325
	Equalized_Odds	2.2124	0.0021	0.274	0.021	3.906	0.0643	0.0341	0.0221	2.1092	0.0015	0.2871	0.0042	3.9407	0.0039	0.0452	0.0059
	Overall_Acc_Equality	2.2124	0.0021	0.0294	0.0168	2.2124	0.0021	0.0294	0.0168	2.1092	0.0015	0.0241	0.0094	2.1092	0.0015	0.0241	0.0094
	Predictive_Equality	2.2124	0.0021	0.2731	0.0202	3.8461	0.0227	0.052	0.0122	2.1092	0.0015	0.2857	0.0019	3.9407	0.0039	0.0452	0.0059
	Predictive_Parity	2.2133	0.0021	0.0871	0.0089	3.5115	0.1018	0.0437	0.0071	2.1092	0.0015	0.0969	0.0079	3.4324	0.074	0.0433	0.0056
0.1	Demographic_Parity	2.2124	0.0021	0.3273	0.0031	3.7238	0.0272	0.0938	0.0098	2.1092	0.0015	0.3379	0.0019	3.6197	0.0164	0.0959	0.0059
	Equal_Opportunity	2.2124	0.0021	0.2258	0.0278	3.6947	0.124	0.0522	0.0147	2.1092	0.0015	0.2468	0.019	3.2975	0.1318	0.0547	0.0476
	Equalized_Odds	2.2133	0.0021	0.2685	0.0163	3.6933	0.104	0.0931	0.025	2.1092	0.0015	0.2871	0.0042	3.7573	0.0819	0.0981	0.0092
	Overall_Acc_Equality	2.2124	0.0021	0.0294	0.0168	2.2124	0.0021	0.0294	0.0168	2.1092	0.0015	0.0241	0.0094	2.1092	0.0015	0.0241	0.0094
	Predictive_Equality	2.2124	0.0021	0.2731	0.0202	3.6458	0.0307	0.0941	0.0067	2.1092	0.0015	0.2857	0.0019	3.7573	0.0819	0.0981	0.0092
	Predictive_Parity	2.2134	0.0021	0.0848	0.0088	2.2425	0.081	0.0821	0.0067	2.1092	0.0015	0.0969	0.0079	2.1845	0.0658	0.0908	0.0125
0.15	Demographic_Parity	2.2124	0.0021	0.3273	0.0031	3.5851	0.0424	0.139	0.0139	2.1092	0.0015	0.3379	0.0019	3.4709	0.0414	0.1399	0.0164
	Equal_Opportunity	2.2124	0.0021	0.2258	0.0278	3.3735	0.2306	0.0838	0.0312	2.1092	0.0015	0.2468	0.019	3.0434	0.2226	0.1075	0.0754
	Equalized_Odds	2.2134	0.0021	0.2664	0.0141	3.5175	0.1609	0.1218	0.0367	2.1092	0.0015	0.2871	0.0042	3.345	0.0263	0.1499	0.0136
	Overall_Acc_Equality	2.2124	0.0021	0.0294	0.0168	2.2124	0.0021	0.0294	0.0168	2.1092	0.0015	0.0241	0.0094	2.1092	0.0015	0.0241	0.0094
	Predictive_Equality	2.2124	0.0021	0.2731	0.0202	3.439	0.0718	0.138	0.0178	2.109	0.0014	0.2856	0.0019	3.348	0.026	0.1493	0.0142
	Predictive_Parity	2.2122	0.0011	0.0875	0.0099	2.2122	0.0011	0.0875	0.0099	2.1092	0.0015	0.0969	0.0079	2.1092	0.0015	0.0969	0.0079
0.2	Demographic_Parity	2.2124	0.0021	0.3273	0.0031	3.441	0.0603	0.1882	0.0193	2.1092	0.0015	0.3379	0.0019	3.3125	0.0107	0.1976	0.0066
	Equal_Opportunity	2.2124	0.0021	0.2258	0.0278	3.0715	0.1659	0.1203	0.0385	2.1092	0.0015	0.2468	0.019	2.9099	0.2717	0.109	0.0659
	Equalized_Odds	2.2122	0.0011	0.264	0.0096	3.2057	0.0776	0.193	0.0115	2.1092	0.0015	0.2871	0.0042	3.1087	0.0443	0.199	0.009
	Overall_Acc_Equality	2.2124	0.0021	0.0294	0.0168	2.2124	0.0021	0.0294	0.0168	2.1092	0.0015	0.0241	0.0094	2.1092	0.0015	0.0241	0.0094
	Predictive_Equality	2.2124	0.0021	0.2731	0.0202	3.2122	0.0577	0.1951	0.0125	2.1092	0.0015	0.2857	0.0019	3.0954	0.0271	0.2012	0.0095
	Predictive_Parity	2.2122	0.001	0.0898	0.0096	2.2122	0.001	0.0898	0.0096	2.1092	0.0015	0.0969	0.0079	2.1092	0.0015	0.0969	0.0079
0.8	Disparate_Impact	2.2124	0.0021	0.397	0.0053	3.5574	0.0444	0.8151	0.0204	2.1092	0.0015	0.3557	0.0034	3.4158	0.0064	0.804	0.0057
