# Supplementary material
Source: ML conference proceedings conference paper supplement (https://openreview.net/forum?id=xiQNfYl33p)
Supplement: supplementary_material [file ACSIncome__True.xlsx]

## Sheet: Sheet1
		stats
	cp_method	aps								tps
	type	base				ours				base				ours
	stat_type	eff_mean	eff_std	violation_mean	violation_std	eff_mean	eff_std	violation_mean	violation_std	eff_mean	eff_std	violation_mean	violation_std	eff_mean	eff_std	violation_mean	violation_std
c	fairness_metric
0.05	Demographic_Parity	2.2124	0.0021	0.3273	0.0031	3.2571	0.0142	0.0541	0.008	2.1092	0.0015	0.3379	0.0019	3.2667	0.0078	0.0502	0.0053
	Equal_Opportunity	2.2124	0.0021	0.2258	0.0278	2.8272	0.1196	0.0688	0.0296	2.1092	0.0015	0.2468	0.019	2.6852	0.0934	0.0677	0.0208
	Equalized_Odds	2.2124	0.0021	0.274	0.021	3.2908	0.0322	0.0537	0.0092	2.1092	0.0015	0.2871	0.0042	3.2987	0.0064	0.0497	0.0079
	Overall_Acc_Equality	2.2124	0.0021	0.0294	0.0168	2.2124	0.0021	0.0294	0.0168	2.1092	0.0015	0.0241	0.0094	2.1092	0.0015	0.0241	0.0094
	Predictive_Equality	2.2124	0.0021	0.2731	0.0202	3.2587	0.0137	0.0552	0.0097	2.1092	0.0015	0.2857	0.0019	3.2987	0.0064	0.0497	0.0079
	Predictive_Parity	2.2133	0.0021	0.0871	0.0089	2.6932	0.0723	0.0493	0.0053	2.1092	0.0015	0.0969	0.0079	2.7679	0.0465	0.0509	0.0088
0.1	Demographic_Parity	2.2124	0.0021	0.3273	0.0031	2.962	0.0485	0.1068	0.0216	2.1092	0.0015	0.3379	0.0019	2.9627	0.0559	0.1063	0.0142
	Equal_Opportunity	2.2124	0.0021	0.2258	0.0278	2.5736	0.0681	0.0872	0.0248	2.1092	0.0015	0.2468	0.019	2.4124	0.047	0.1028	0.0359
	Equalized_Odds	2.2133	0.0021	0.2685	0.0163	3.0663	0.0554	0.1074	0.0179	2.1092	0.0015	0.2871	0.0042	3.0597	0.0668	0.1121	0.0171
	Overall_Acc_Equality	2.2124	0.0021	0.0294	0.0168	2.2124	0.0021	0.0294	0.0168	2.1092	0.0015	0.0241	0.0094	2.1092	0.0015	0.0241	0.0094
	Predictive_Equality	2.2124	0.0021	0.2731	0.0202	3.044	0.017	0.0988	0.0079	2.1092	0.0015	0.2857	0.0019	3.0597	0.0668	0.1121	0.0171
	Predictive_Parity	2.2134	0.0021	0.0848	0.0088	2.2188	0.0139	0.0847	0.0088	2.1092	0.0015	0.0969	0.0079	2.1316	0.0182	0.0934	0.0113
0.15	Demographic_Parity	2.2124	0.0021	0.3273	0.0031	2.7288	0.032	0.1486	0.0087	2.1092	0.0015	0.3379	0.0019	2.7117	0.0127	0.1523	0.0074
	Equal_Opportunity	2.2124	0.0021	0.2258	0.0278	2.4484	0.0707	0.103	0.0273	2.1092	0.0015	0.2468	0.019	2.3391	0.0606	0.1306	0.0583
	Equalized_Odds	2.2134	0.0021	0.2664	0.0141	2.7657	0.0705	0.1621	0.0174	2.1092	0.0015	0.2871	0.0042	2.7331	0.0638	0.1567	0.0131
	Overall_Acc_Equality	2.2124	0.0021	0.0294	0.0168	2.2124	0.0021	0.0294	0.0168	2.1092	0.0015	0.0241	0.0094	2.1092	0.0015	0.0241	0.0094
	Predictive_Equality	2.2124	0.0021	0.2731	0.0202	2.7242	0.0507	0.1541	0.0156	2.1092	0.0015	0.2857	0.0019	2.7331	0.0638	0.1567	0.0131
	Predictive_Parity	2.2122	0.0011	0.0875	0.0099	2.2122	0.0011	0.0875	0.0099	2.1092	0.0015	0.0969	0.0079	2.1092	0.0015	0.0969	0.0079
0.2	Demographic_Parity	2.2124	0.0021	0.3273	0.0031	2.589	0.0271	0.1991	0.0137	2.1092	0.0015	0.3379	0.0019	2.6034	0.0066	0.2018	0.0066
	Equal_Opportunity	2.2124	0.0021	0.2258	0.0278	2.3636	0.0372	0.1258	0.0338	2.1092	0.0015	0.2468	0.019	2.3025	0.0685	0.1267	0.0533
	Equalized_Odds	2.2122	0.0011	0.264	0.0096	2.5622	0.0225	0.2119	0.0237	2.1092	0.0015	0.2871	0.0042	2.5802	0.0142	0.2094	0.0182
	Overall_Acc_Equality	2.2124	0.0021	0.0294	0.0168	2.2124	0.0021	0.0294	0.0168	2.1092	0.0015	0.0241	0.0094	2.1092	0.0015	0.0241	0.0094
	Predictive_Equality	2.2124	0.0021	0.2731	0.0202	2.5594	0.0283	0.2113	0.0173	2.1092	0.0015	0.2857	0.0019	2.5767	0.013	0.2094	0.0182
	Predictive_Parity	2.2122	0.001	0.0898	0.0096	2.2122	0.001	0.0898	0.0096	2.1092	0.0015	0.0969	0.0079	2.1092	0.0015	0.0969	0.0079
0.8	Disparate_Impact	2.2124	0.0021	0.397	0.0053	2.674	0.0337	0.7973	0.0161	2.1092	0.0015	0.3557	0.0034	2.6785	0.0447	0.7975	0.0077
