# Supplementary material
Source: ML conference proceedings conference paper supplement (https://openreview.net/forum?id=xiQNfYl33p)

Closeness Threshold:

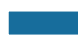

0.05

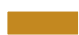

0.1

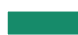

0.15

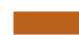

0.2

APS

TPS

Actual Fairness Disparity

0.5

0.4

0.3

0.2

0.1

0.0

Dem\_Parity Eq\_Opp Eq\_Odds Pred\_Eq Pred\_Parity

Dem\_Parity Eq\_Opp Eq\_Odds Pred\_Eq Pred\_Parity

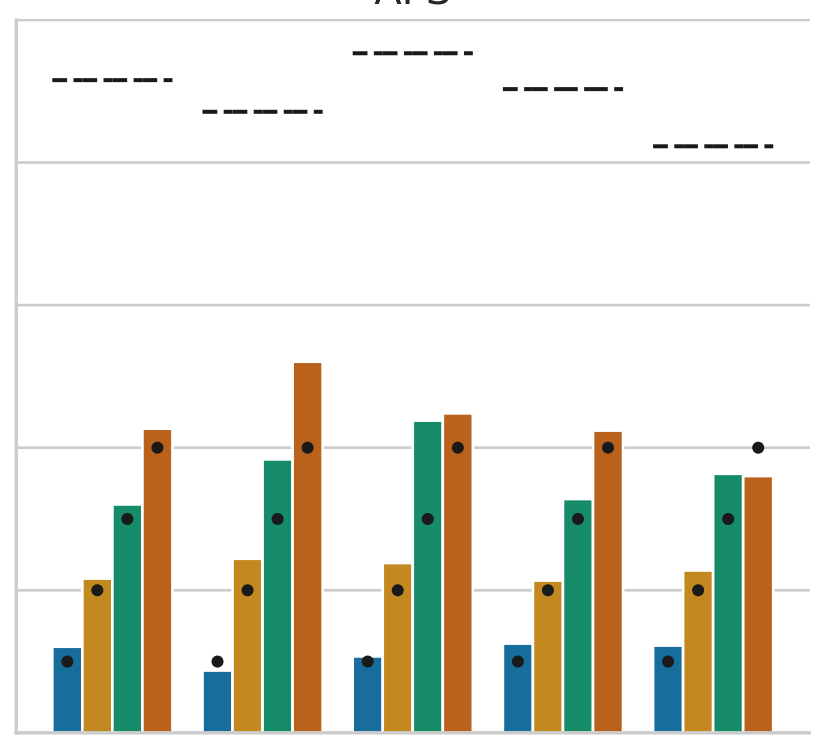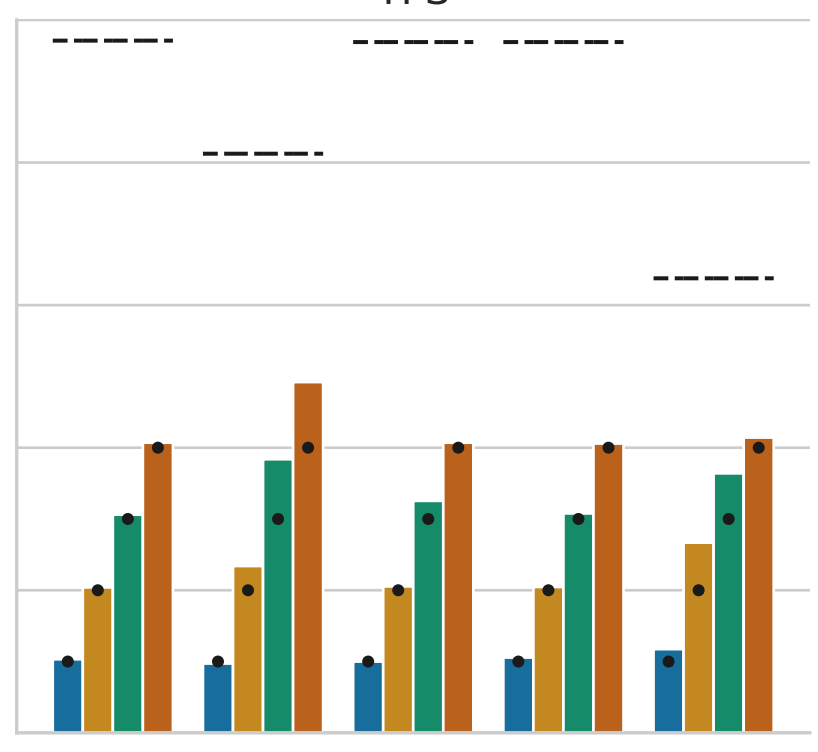

Supplement: supplementary_material [file attachment]
