# Supplementary material
Source: ML conference proceedings conference paper supplement (https://openreview.net/forum?id=xiQNfYl33p)
Supplement: supplementary_material [file attachment]

## Sheet: Sheet1
		stats
	cp_method	aps								cfgnn								daps								tps
	type	base				ours				base				ours				base				ours				base				ours
	stat_type	eff_mean	eff_std	violation_mean	violation_std	eff_mean	eff_std	violation_mean	violation_std	eff_mean	eff_std	violation_mean	violation_std	eff_mean	eff_std	violation_mean	violation_std	eff_mean	eff_std	violation_mean	violation_std	eff_mean	eff_std	violation_mean	violation_std	eff_mean	eff_std	violation_mean	violation_std	eff_mean	eff_std	violation_mean	violation_std
c	fairness_metric
0.05	Demographic_Parity	2.4851	0.0504	0.1602	0.022	3.7908	0.0777	0.0626	0.0146	2.5372	0.0812	0.1992	0.0154	3.8927	0.0606	0.0458	0.03	2.5091	0.0544	0.166	0.0317	3.8448	0.0974	0.0519	0.0152	2.3412	0.0512	0.1585	0.0215	3.8667	0.0669	0.0557	0.0183
	Equal_Opportunity	2.4851	0.0504	0.1518	0.0524	3.539	0.1316	0.0552	0.034	2.5372	0.0812	0.1716	0.0381	3.8355	0.0854	0.0302	0.0165	2.5091	0.0544	0.1516	0.0352	3.8175	0.1076	0.0222	0.0179	2.3412	0.0512	0.1093	0.0528	3.5531	0.084	0.0323	0.0123
	Equalized_Odds	2.4851	0.0504	0.1751	0.0218	3.8496	0.0988	0.0664	0.014	2.5372	0.0812	0.1951	0.0229	3.921	0.0442	0.0369	0.0179	2.5091	0.0544	0.1709	0.0303	3.9139	0.0501	0.0497	0.0247	2.3412	0.0512	0.1584	0.0311	3.9289	0.0213	0.0555	0.0183
	Overall_Acc_Equality	2.4851	0.0504	0.0296	0.0097	2.4855	0.0502	0.0296	0.0097	2.5372	0.0812	0.0453	0.0093	2.6684	0.1581	0.0392	0.0101	2.5091	0.0544	0.0301	0.0104	2.6708	0.2478	0.0282	0.012	2.3412	0.0512	0.0384	0.0109	2.3479	0.0582	0.038	0.0117
	Predictive_Equality	2.4851	0.0504	0.1472	0.0211	3.8496	0.0988	0.0664	0.014	2.5372	0.0812	0.1879	0.0165	3.9157	0.0567	0.044	0.0286	2.5091	0.0544	0.1518	0.0339	3.8691	0.0796	0.0642	0.0205	2.3412	0.0512	0.145	0.0208	3.9289	0.0213	0.0555	0.0183
	Predictive_Parity	2.4849	0.0499	0.0552	0.0155	2.7945	0.2654	0.0448	0.018	2.5372	0.0812	0.1188	0.0133	4	0	0.086	0	2.4861	0.0659	0.054	0.0151	3.3475	0.2279	0.0272	0.0065	2.3412	0.0512	0.066	0.013	2.7859	0.1653	0.0447	0.0147
0.1	Demographic_Parity	2.4849	0.0499	0.1531	0.0242	3.4794	0.1187	0.0944	0.027	2.5811	0.0615	0.1635	0.0211	3.6647	0.0967	0.0911	0.0211	2.4861	0.0659	0.1609	0.0285	3.4653	0.1751	0.0946	0.0236	2.3412	0.0512	0.1585	0.0215	3.5691	0.0557	0.0947	0.0216
	Equal_Opportunity	2.4849	0.0499	0.1513	0.0423	2.9324	0.3483	0.1249	0.0522	2.5811	0.0615	0.1565	0.0395	3.3981	0.4254	0.062	0.0405	2.4861	0.0659	0.1477	0.0439	3.4362	0.2549	0.0722	0.0342	2.3412	0.0512	0.1093	0.0528	2.5483	0.244	0.1077	0.0459
	Equalized_Odds	2.4849	0.0499	0.161	0.0346	3.5381	0.1698	0.0948	0.0252	2.5811	0.0615	0.1755	0.0214	3.7937	0.1078	0.0778	0.0264	2.4861	0.0659	0.1672	0.0352	3.5946	0.1545	0.077	0.0185	2.3412	0.0512	0.1584	0.0311	3.488	0.3213	0.1044	0.0292
	Overall_Acc_Equality	2.4849	0.0499	0.0315	0.0135	2.4849	0.0499	0.0315	0.0135	2.5811	0.0615	0.0396	0.0079	2.5811	0.0615	0.0396	0.0079	2.4861	0.0659	0.0279	0.0101	2.4861	0.0659	0.0279	0.0101	2.3412	0.0512	0.0384	0.0109	2.3412	0.0512	0.0384	0.0109
	Predictive_Equality	2.4849	0.0499	0.1396	0.0254	3.537	0.1715	0.0949	0.0253	2.5811	0.0615	0.1562	0.0208	3.73	0.0761	0.0931	0.0229	2.4861	0.0659	0.1478	0.0302	3.3489	0.4097	0.108	0.037	2.3412	0.0512	0.145	0.0208	3.488	0.3213	0.1044	0.0292
	Predictive_Parity	2.473	0.042	0.0522	0.0106	2.473	0.042	0.0522	0.0106	2.5811	0.0615	0.1144	0.0143	3.9165	0.0438	0.0863	0.0019	2.5101	0.0597	0.0558	0.0135	2.5739	0.1505	0.0532	0.015	2.3412	0.0512	0.066	0.013	2.3412	0.0512	0.066	0.013
0.15	Demographic_Parity	2.473	0.042	0.1531	0.0243	2.7625	0.4047	0.1448	0.0357	2.6202	0.0695	0.1322	0.0098	2.7956	0.2199	0.1309	0.0106	2.5101	0.0597	0.1713	0.0251	2.918	0.3522	0.1527	0.0321	2.3412	0.0512	0.1585	0.0215	2.5797	0.4521	0.1576	0.0216
	Equal_Opportunity	2.473	0.042	0.1522	0.0383	2.61	0.1722	0.1377	0.0441	2.6202	0.0695	0.1472	0.039	2.8448	0.1834	0.1327	0.0378	2.5101	0.0597	0.1513	0.038	3.1092	0.2249	0.1018	0.0344	2.3412	0.0512	0.1093	0.0528	2.3435	0.0482	0.1126	0.055
	Equalized_Odds	2.473	0.042	0.1617	0.0299	2.841	0.3575	0.1495	0.0455	2.6202	0.0695	0.1542	0.0303	3.0752	0.2989	0.1437	0.0303	2.5101	0.0597	0.1775	0.022	3.2206	0.2089	0.1289	0.0304	2.3412	0.0512	0.1584	0.0311	2.3481	0.0533	0.1587	0.0235
	Overall_Acc_Equality	2.473	0.042	0.0276	0.0112	2.473	0.042	0.0276	0.0112	2.6202	0.0695	0.0363	0.0118	2.6202	0.0695	0.0363	0.0118	2.5101	0.0597	0.0245	0.007	2.5101	0.0597	0.0245	0.007	2.3412	0.0512	0.0384	0.0109	2.3412	0.0512	0.0384	0.0109
	Predictive_Equality	2.473	0.042	0.1351	0.0251	2.7242	0.3941	0.1342	0.0292	2.6202	0.0695	0.1312	0.012	2.9869	0.3345	0.1294	0.0119	2.5101	0.0597	0.1596	0.0294	2.9414	0.366	0.1419	0.0322	2.3412	0.0512	0.145	0.0208	2.3458	0.0562	0.1444	0.021
	Predictive_Parity	2.4854	0.0439	0.0516	0.0136	2.4854	0.0439	0.0516	0.0136	2.6202	0.0695	0.1034	0.0188	3.4506	0.0651	0.0882	0.0075	2.4837	0.0875	0.0531	0.0147	2.4837	0.0875	0.0531	0.0147	2.3412	0.0512	0.066	0.013	2.3412	0.0512	0.066	0.013
0.2	Demographic_Parity	2.4854	0.0439	0.1542	0.0251	2.5143	0.1019	0.152	0.0268	2.6557	0.0613	0.1201	0.0153	2.6557	0.0613	0.1201	0.0153	2.4837	0.0875	0.1712	0.0354	2.5991	0.194	0.1645	0.0311	2.3412	0.0512	0.1585	0.0215	2.3412	0.0512	0.1585	0.0215
	Equal_Opportunity	2.4854	0.0439	0.1327	0.0358	2.512	0.067	0.1342	0.0346	2.6557	0.0613	0.135	0.0413	2.7848	0.1083	0.1241	0.0479	2.4837	0.0875	0.1479	0.0266	2.6925	0.2743	0.1233	0.0338	2.3412	0.0512	0.1093	0.0528	2.3412	0.0512	0.1093	0.0528
	Equalized_Odds	2.4854	0.0439	0.1532	0.0243	2.5389	0.1011	0.1551	0.0226	2.6557	0.0613	0.1531	0.0148	2.7849	0.1089	0.1473	0.0193	2.4837	0.0875	0.1778	0.0265	2.7074	0.2792	0.1757	0.0325	2.3412	0.0512	0.1584	0.0311	2.3412	0.0512	0.1584	0.0311
	Overall_Acc_Equality	2.4854	0.0439	0.0288	0.0082	2.4854	0.0439	0.0288	0.0082	2.6557	0.0613	0.0383	0.0103	2.6557	0.0613	0.0383	0.0103	2.4837	0.0875	0.0272	0.0105	2.4837	0.0875	0.0272	0.0105	2.3412	0.0512	0.0384	0.0109	2.3412	0.0512	0.0384	0.0109
	Predictive_Equality	2.4854	0.0439	0.1388	0.0244	2.5123	0.0962	0.1362	0.0274	2.6557	0.0613	0.1283	0.0198	2.6557	0.0613	0.1283	0.0198	2.4837	0.0875	0.1583	0.0426	2.55	0.1718	0.16	0.0396	2.3412	0.0512	0.145	0.0208	2.3412	0.0512	0.145	0.0208
	Predictive_Parity	2.493	0.0586	0.0512	0.0137	2.493	0.0586	0.0512	0.0137	2.6557	0.0613	0.1135	0.0227	2.8192	0.0874	0.1055	0.0196	2.4797	0.064	0.057	0.0114	2.4797	0.064	0.057	0.0114	2.3412	0.0512	0.066	0.013	2.3412	0.0512	0.066	0.013
0.8	Disparate_Impact	2.4851	0.0504	0.7179	0.0369	3.0373	0.2537	0.7924	0.0566	2.5372	0.0812	0.6024	0.0437	3.5632	0.1033	0.8118	0.0285	2.5091	0.0544	0.7204	0.0359	2.9914	0.332	0.7873	0.0745	2.3412	0.0512	0.7164	0.0365	2.9699	0.3218	0.7851	0.0592
