# Supplementary material
Source: ML conference proceedings conference paper supplement (https://openreview.net/forum?id=xiQNfYl33p)

Closeness Threshold:

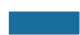

0.05

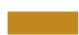

0.1

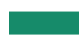

0.15

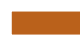

0.2

APS

TPS

Efficiency

4.0  
3.5  
3.0  
2.5  
2.0  
1.5  
1.0  
0.5  
0.0

Dem\_Parity Eq\_Opp Eq\_Odds Pred\_Eq Pred\_Parity

Dem\_Parity Eq\_Opp Eq\_Odds Pred\_Eq Pred\_Parity

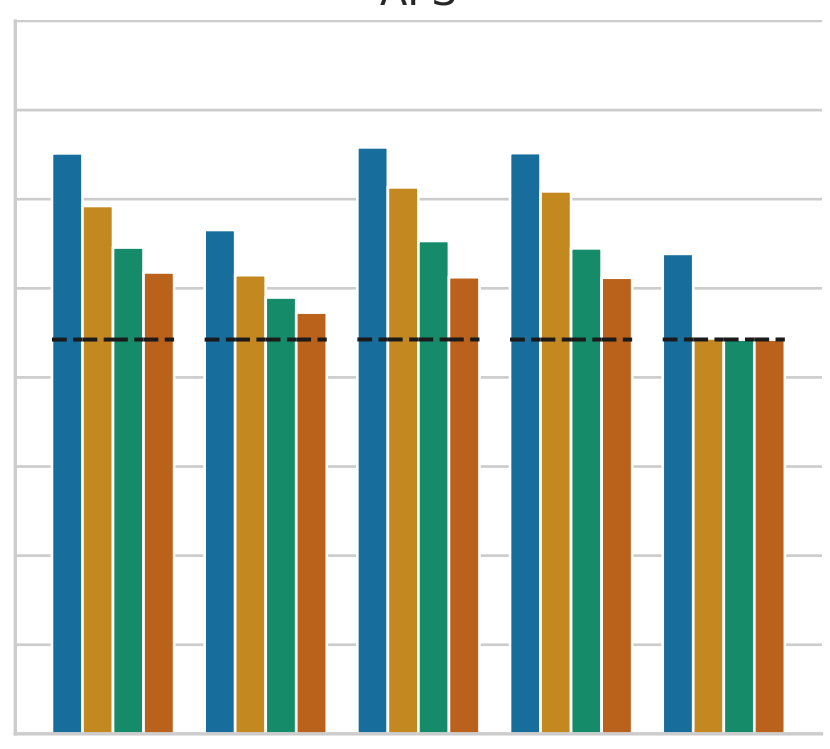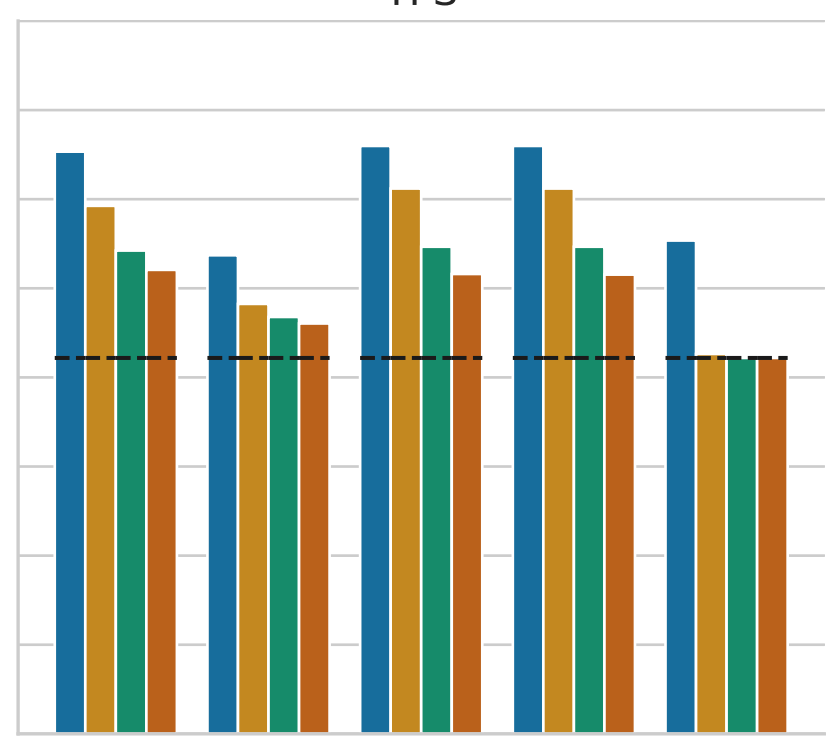

Supplement: supplementary_material [file attachment]
