# Supplementary material
Source: ML conference proceedings conference paper supplement (https://openreview.net/forum?id=xiQNfYl33p)
Supplement: supplementary_material [file Credit_Age_True.xlsx]

## Sheet: Sheet1
		stats
	cp_method	aps								cfgnn								daps								tps
	type	base				ours				base				ours				base				ours				base				ours
	stat_type	eff_mean	eff_std	violation_mean	violation_std	eff_mean	eff_std	violation_mean	violation_std	eff_mean	eff_std	violation_mean	violation_std	eff_mean	eff_std	violation_mean	violation_std	eff_mean	eff_std	violation_mean	violation_std	eff_mean	eff_std	violation_mean	violation_std	eff_mean	eff_std	violation_mean	violation_std	eff_mean	eff_std	violation_mean	violation_std
c	fairness_metric
0.05	Demographic_Parity	2.3255	0.0112	0.1696	0.0227	2.809	0.0436	0.0609	0.0191	2.2025	0.0282	0.0607	0.0082	2.3818	0.2083	0.0529	0.0082	2.254	0.0242	0.1768	0.0192	2.777	0.08	0.0641	0.0282	2.2678	0.0099	0.3232	0.0061	2.6502	0.0126	0.0538	0.016
	Equal_Opportunity	2.3255	0.0112	0.2273	0.0672	2.7527	0.0862	0.0629	0.0332	2.2025	0.0282	0.0635	0.0319	2.2492	0.1022	0.0648	0.0313	2.254	0.0242	0.1965	0.05	2.5079	0.2077	0.1076	0.0623	2.2678	0.0099	0.4469	0.0228	2.6708	0.0622	0.066	0.0485
	Equalized_Odds	2.3255	0.0112	0.2273	0.0672	2.8661	0.0494	0.0654	0.0255	2.2025	0.0282	0.1052	0.0132	2.6089	0.2788	0.0609	0.0175	2.254	0.0242	0.1985	0.0476	2.8393	0.0734	0.0628	0.0236	2.2678	0.0099	0.4469	0.0228	2.7268	0.0522	0.0716	0.0221
	Overall_Acc_Equality	2.3255	0.0112	0.0081	0.0055	2.3255	0.0112	0.0081	0.0055	2.2025	0.0282	0.0293	0.0074	2.2025	0.0282	0.0293	0.0074	2.254	0.0242	0.0087	0.0051	2.254	0.0242	0.0087	0.0051	2.2678	0.0099	0.0287	0.0052	2.2678	0.0099	0.0287	0.0052
	Predictive_Equality	2.3255	0.0112	0.153	0.0178	2.8352	0.0525	0.0587	0.0201	2.2025	0.0282	0.1045	0.0138	2.6079	0.2774	0.0523	0.0071	2.254	0.0242	0.1608	0.0171	2.8107	0.0846	0.0624	0.0311	2.2678	0.0099	0.2943	0.0061	2.6845	0.0227	0.0664	0.0169
	Predictive_Parity	2.3314	0.0138	0.0271	0.004	2.3352	0.0208	0.0271	0.004	2.2025	0.0282	0.0487	0.0093	2.2272	0.0581	0.0488	0.0094	2.2576	0.0271	0.0271	0.0057	2.2823	0.0533	0.0271	0.0057	2.2678	0.0099	0.0276	0.0071	2.2704	0.0133	0.0276	0.0071
0.1	Demographic_Parity	2.3314	0.0138	0.1725	0.0209	2.5785	0.0677	0.106	0.0262	2.2056	0.0237	0.0672	0.0122	2.2056	0.0237	0.0672	0.0122	2.2576	0.0271	0.1785	0.0161	2.6214	0.1038	0.0914	0.0206	2.2678	0.0099	0.3232	0.0061	2.5969	0.015	0.1032	0.0277
	Equal_Opportunity	2.3314	0.0138	0.2175	0.0438	2.6095	0.0937	0.0968	0.0467	2.2056	0.0237	0.0566	0.0306	2.2177	0.0404	0.0578	0.0317	2.2576	0.0271	0.192	0.0346	2.4752	0.187	0.1216	0.0706	2.2678	0.0099	0.4469	0.0228	2.587	0.0333	0.1178	0.081
	Equalized_Odds	2.3314	0.0138	0.2212	0.0384	2.6551	0.0823	0.1151	0.0271	2.2056	0.0237	0.1173	0.0142	2.3193	0.128	0.1009	0.0195	2.2576	0.0271	0.1943	0.0316	2.6625	0.1089	0.1092	0.0225	2.2678	0.0099	0.4469	0.0228	2.6007	0.0214	0.1053	0.0259
	Overall_Acc_Equality	2.3314	0.0138	0.0065	0.0048	2.3314	0.0138	0.0065	0.0048	2.2056	0.0237	0.0289	0.0074	2.2056	0.0237	0.0289	0.0074	2.2576	0.0271	0.0089	0.0046	2.2576	0.0271	0.0089	0.0046	2.2678	0.0099	0.0287	0.0052	2.2678	0.0099	0.0287	0.0052
	Predictive_Equality	2.3314	0.0138	0.1578	0.0226	2.5674	0.0858	0.1192	0.0142	2.2056	0.0237	0.1173	0.0142	2.3073	0.1297	0.1006	0.02	2.2576	0.0271	0.1634	0.0158	2.6079	0.0837	0.1048	0.0122	2.2678	0.0099	0.2943	0.0061	2.5896	0.015	0.1069	0.0194
	Predictive_Parity	2.3271	0.0142	0.0298	0.0049	2.3271	0.0142	0.0298	0.0049	2.2056	0.0237	0.0456	0.0076	2.2056	0.0237	0.0456	0.0076	2.2584	0.0189	0.0305	0.0101	2.2584	0.0189	0.0305	0.0101	2.2678	0.0099	0.0276	0.0071	2.2678	0.0099	0.0276	0.0071
0.15	Demographic_Parity	2.3271	0.0142	0.1755	0.0208	2.3924	0.0698	0.1564	0.0195	2.2154	0.0244	0.0743	0.0072	2.2154	0.0244	0.0743	0.0072	2.2584	0.0189	0.1754	0.0164	2.4266	0.1175	0.1401	0.0368	2.2678	0.0099	0.3232	0.0061	2.5492	0.0169	0.1538	0.0343
	Equal_Opportunity	2.3271	0.0142	0.2424	0.0404	2.497	0.1195	0.1735	0.0744	2.2154	0.0244	0.0796	0.0385	2.2154	0.0244	0.0796	0.0385	2.2584	0.0189	0.1693	0.0546	2.4468	0.1744	0.1239	0.07	2.2678	0.0099	0.4469	0.0228	2.5489	0.0314	0.1718	0.0756
	Equalized_Odds	2.3271	0.0142	0.2424	0.0404	2.5003	0.116	0.185	0.0573	2.2154	0.0244	0.1258	0.0099	2.2155	0.0245	0.1259	0.0098	2.2584	0.0189	0.1841	0.0355	2.4881	0.1551	0.1425	0.0441	2.2678	0.0099	0.4469	0.0228	2.556	0.023	0.1624	0.0595
	Overall_Acc_Equality	2.3271	0.0142	0.0049	0.0039	2.3271	0.0142	0.0049	0.0039	2.2154	0.0244	0.0277	0.0055	2.2154	0.0244	0.0277	0.0055	2.2584	0.0189	0.0116	0.0064	2.2584	0.0189	0.0116	0.0064	2.2678	0.0099	0.0287	0.0052	2.2678	0.0099	0.0287	0.0052
	Predictive_Equality	2.3271	0.0142	0.1582	0.0209	2.3708	0.0645	0.1458	0.0195	2.2154	0.0244	0.1251	0.0099	2.2155	0.0245	0.1252	0.0099	2.2584	0.0189	0.1636	0.0133	2.3603	0.1103	0.145	0.0273	2.2678	0.0099	0.2943	0.0061	2.5353	0.0182	0.157	0.0363
	Predictive_Parity	2.3296	0.0151	0.0284	0.003	2.3296	0.0151	0.0284	0.003	2.2154	0.0244	0.0496	0.0074	2.2154	0.0244	0.0496	0.0074	2.2661	0.0238	0.0278	0.0027	2.2661	0.0238	0.0278	0.0027	2.2678	0.0099	0.0276	0.0071	2.2678	0.0099	0.0276	0.0071
0.2	Demographic_Parity	2.3296	0.0151	0.1706	0.0155	2.3296	0.0151	0.1706	0.0155	2.2139	0.0223	0.0735	0.0087	2.2139	0.0223	0.0735	0.0087	2.2661	0.0238	0.1815	0.0157	2.2664	0.0242	0.1816	0.0157	2.2678	0.0099	0.3232	0.0061	2.5022	0.0183	0.2025	0.0349
	Equal_Opportunity	2.3296	0.0151	0.2203	0.0377	2.3929	0.0588	0.1766	0.0558	2.2139	0.0223	0.089	0.06	2.2139	0.0223	0.089	0.06	2.2661	0.0238	0.2192	0.0357	2.334	0.1237	0.194	0.0494	2.2678	0.0099	0.4469	0.0228	2.5123	0.0386	0.2116	0.0786
	Equalized_Odds	2.3296	0.0151	0.2213	0.036	2.3929	0.0588	0.1833	0.0472	2.2139	0.0223	0.1371	0.0275	2.2139	0.0223	0.1371	0.0275	2.2661	0.0238	0.2204	0.0333	2.3353	0.1243	0.1977	0.0449	2.2678	0.0099	0.4469	0.0228	2.5189	0.0297	0.2142	0.0618
	Overall_Acc_Equality	2.3296	0.0151	0.0062	0.0052	2.3296	0.0151	0.0062	0.0052	2.2139	0.0223	0.0245	0.0078	2.2139	0.0223	0.0245	0.0078	2.2661	0.0238	0.006	0.0052	2.2661	0.0238	0.006	0.0052	2.2678	0.0099	0.0287	0.0052	2.2678	0.0099	0.0287	0.0052
	Predictive_Equality	2.3296	0.0151	0.155	0.0171	2.3296	0.0151	0.155	0.0171	2.2139	0.0223	0.1264	0.0101	2.2139	0.0223	0.1264	0.0101	2.2661	0.0238	0.1642	0.0156	2.2661	0.0238	0.1642	0.0156	2.2678	0.0099	0.2943	0.0061	2.489	0.0159	0.204	0.0319
	Predictive_Parity	2.3351	0.0211	0.0288	0.0062	2.3351	0.0211	0.0288	0.0062	2.2139	0.0223	0.0544	0.0119	2.2139	0.0223	0.0544	0.0119	2.2732	0.0223	0.0279	0.0036	2.2732	0.0223	0.0279	0.0036	2.2678	0.0099	0.0276	0.0071	2.2678	0.0099	0.0276	0.0071
0.8	Disparate_Impact	2.3255	0.0112	0.6464	0.0453	2.5133	0.0196	0.8214	0.0376	2.202	0.018	0.9223	0.0317	2.202	0.018	0.9223	0.0317	2.254	0.0242	0.5388	0.0364	2.5258	0.0562	0.8086	0.0647	2.2678	0.0099	0.2519	0.0144	2.5577	0.0124	0.7926	0.0473
