# Supplementary material
Source: ML conference proceedings conference paper supplement (https://openreview.net/forum?id=xiQNfYl33p)
Supplement: supplementary_material [file Pokec_n_gender_False.xlsx]

## Sheet: Sheet1
		stats
	cp_method	aps								cfgnn								daps								tps
	type	base				ours				base				ours				base				ours				base				ours
	stat_type	eff_mean	eff_std	violation_mean	violation_std	eff_mean	eff_std	violation_mean	violation_std	eff_mean	eff_std	violation_mean	violation_std	eff_mean	eff_std	violation_mean	violation_std	eff_mean	eff_std	violation_mean	violation_std	eff_mean	eff_std	violation_mean	violation_std	eff_mean	eff_std	violation_mean	violation_std	eff_mean	eff_std	violation_mean	violation_std
c	fairness_metric
0.05	Demographic_Parity	2.4654	0.0421	0.0923	0.0087	3.5628	0.1441	0.055	0.0253	2.6365	0.0592	0.1027	0.0133	3.5277	0.1269	0.0617	0.0186	2.474	0.0674	0.092	0.0081	3.5219	0.2191	0.0522	0.0325	2.3434	0.0315	0.0991	0.008	3.5653	0.1517	0.0527	0.033
	Equal_Opportunity	2.4654	0.0421	0.0587	0.0273	2.9598	0.3278	0.0493	0.0213	2.6365	0.0592	0.1361	0.0257	3.6361	0.1966	0.0565	0.0339	2.474	0.0674	0.0724	0.0258	3.1811	0.3743	0.0387	0.0293	2.3434	0.0315	0.0692	0.0253	2.9936	0.3425	0.0645	0.041
	Equalized_Odds	2.4654	0.0421	0.0821	0.0139	3.506	0.1967	0.0604	0.0349	2.6365	0.0592	0.1381	0.0238	3.6717	0.1616	0.0575	0.0206	2.474	0.0674	0.0842	0.0165	3.5488	0.1444	0.0494	0.0292	2.3434	0.0315	0.0874	0.0171	3.4414	0.3055	0.0558	0.0378
	Overall_Acc_Equality	2.4654	0.0421	0.0108	0.0037	2.4654	0.0421	0.0108	0.0037	2.6365	0.0592	0.0075	0.0046	2.6365	0.0592	0.0075	0.0046	2.474	0.0674	0.0156	0.0082	2.474	0.0674	0.0156	0.0082	2.3434	0.0315	0.0103	0.0053	2.3434	0.0315	0.0103	0.0053
	Predictive_Equality	2.4654	0.0421	0.078	0.01	3.4678	0.2546	0.0613	0.0365	2.6365	0.0592	0.0907	0.0168	3.478	0.1461	0.067	0.025	2.474	0.0674	0.0769	0.0115	3.3669	0.3669	0.0572	0.0316	2.3434	0.0315	0.0839	0.0091	3.4182	0.3377	0.0534	0.0322
	Predictive_Parity	2.4777	0.0385	0.0438	0.0136	2.5428	0.1783	0.043	0.0143	2.6365	0.0592	0.0633	0.0173	4	0	0.051	0	2.513	0.0623	0.0453	0.0145	2.7719	0.2681	0.0378	0.0171	2.3434	0.0315	0.0521	0.0111	2.436	0.0801	0.0465	0.015
0.1	Demographic_Parity	2.4777	0.0385	0.092	0.0073	2.4952	0.0494	0.0919	0.0074	2.739	0.0423	0.0943	0.0135	2.793	0.1382	0.0936	0.0135	2.513	0.0623	0.0922	0.0099	2.699	0.287	0.0906	0.0104	2.3434	0.0315	0.0991	0.008	2.3814	0.0764	0.0975	0.0103
	Equal_Opportunity	2.4777	0.0385	0.0623	0.0219	2.5006	0.0768	0.0605	0.0196	2.739	0.0423	0.1305	0.033	3.2807	0.2901	0.0884	0.0461	2.513	0.0623	0.0718	0.0315	2.5407	0.0876	0.0661	0.0343	2.3434	0.0315	0.0692	0.0253	2.3749	0.0708	0.0712	0.0243
	Equalized_Odds	2.4777	0.0385	0.0811	0.0121	2.5006	0.0768	0.0803	0.0114	2.739	0.0423	0.1305	0.033	3.2888	0.2897	0.0933	0.0419	2.513	0.0623	0.0864	0.0195	2.594	0.238	0.0855	0.0197	2.3434	0.0315	0.0874	0.0171	2.3749	0.0708	0.0858	0.0178
	Overall_Acc_Equality	2.4777	0.0385	0.0116	0.0072	2.4777	0.0385	0.0116	0.0072	2.739	0.0423	0.0111	0.0091	2.739	0.0423	0.0111	0.0091	2.513	0.0623	0.0106	0.0078	2.513	0.0623	0.0106	0.0078	2.3434	0.0315	0.0103	0.0053	2.3434	0.0315	0.0103	0.0053
	Predictive_Equality	2.4777	0.0385	0.0776	0.01	2.4777	0.0385	0.0776	0.01	2.739	0.0423	0.0841	0.0173	2.7839	0.1344	0.0835	0.0174	2.513	0.0623	0.0795	0.012	2.5132	0.0626	0.0795	0.012	2.3434	0.0315	0.0839	0.0091	2.3434	0.0315	0.0839	0.0091
	Predictive_Parity	2.4776	0.0425	0.0428	0.0157	2.4776	0.0425	0.0428	0.0157	2.739	0.0423	0.0601	0.0135	3.4145	0.0726	0.0519	0.0039	2.481	0.0404	0.0442	0.0118	2.481	0.0404	0.0442	0.0118	2.3434	0.0315	0.0521	0.0111	2.3434	0.0315	0.0521	0.0111
0.15	Demographic_Parity	2.4776	0.0425	0.0909	0.0098	2.4776	0.0425	0.0909	0.0098	2.7773	0.0872	0.087	0.0111	2.7773	0.0872	0.087	0.0111	2.481	0.0404	0.0926	0.0071	2.481	0.0404	0.0926	0.0071	2.3434	0.0315	0.0991	0.008	2.3434	0.0315	0.0991	0.008
	Equal_Opportunity	2.4776	0.0425	0.0612	0.0289	2.4776	0.0425	0.0612	0.0289	2.7773	0.0872	0.1175	0.0302	2.9559	0.1522	0.1131	0.0288	2.481	0.0404	0.0706	0.0252	2.481	0.0404	0.0706	0.0252	2.3434	0.0315	0.0692	0.0253	2.3434	0.0315	0.0692	0.0253
	Equalized_Odds	2.4776	0.0425	0.0815	0.0147	2.4776	0.0425	0.0815	0.0147	2.7773	0.0872	0.1186	0.0277	2.9557	0.1521	0.1131	0.0288	2.481	0.0404	0.0852	0.0129	2.481	0.0404	0.0852	0.0129	2.3434	0.0315	0.0874	0.0171	2.3434	0.0315	0.0874	0.0171
	Overall_Acc_Equality	2.4776	0.0425	0.0134	0.0083	2.4776	0.0425	0.0134	0.0083	2.7773	0.0872	0.0215	0.01	2.7773	0.0872	0.0215	0.01	2.481	0.0404	0.0113	0.0079	2.481	0.0404	0.0113	0.0079	2.3434	0.0315	0.0103	0.0053	2.3434	0.0315	0.0103	0.0053
	Predictive_Equality	2.4776	0.0425	0.0762	0.0126	2.4776	0.0425	0.0762	0.0126	2.7773	0.0872	0.0806	0.0127	2.7773	0.0872	0.0806	0.0127	2.481	0.0404	0.0782	0.0088	2.481	0.0404	0.0782	0.0088	2.3434	0.0315	0.0839	0.0091	2.3434	0.0315	0.0839	0.0091
	Predictive_Parity	2.4739	0.0401	0.047	0.0135	2.4739	0.0401	0.047	0.0135	2.7773	0.0872	0.0492	0.0175	2.9149	0.1831	0.0526	0.0148	2.4808	0.0688	0.0481	0.014	2.4808	0.0688	0.0481	0.014	2.3434	0.0315	0.0521	0.0111	2.3434	0.0315	0.0521	0.0111
0.2	Demographic_Parity	2.4739	0.0401	0.0956	0.011	2.4739	0.0401	0.0956	0.011	2.8058	0.0513	0.0843	0.0112	2.8058	0.0513	0.0843	0.0112	2.4808	0.0688	0.0948	0.0113	2.4808	0.0688	0.0948	0.0113	2.3434	0.0315	0.0991	0.008	2.3434	0.0315	0.0991	0.008
	Equal_Opportunity	2.4739	0.0401	0.0704	0.025	2.4739	0.0401	0.0704	0.025	2.8058	0.0513	0.1163	0.0276	2.8341	0.0813	0.1123	0.0304	2.4808	0.0688	0.0664	0.0282	2.4808	0.0688	0.0664	0.0282	2.3434	0.0315	0.0692	0.0253	2.3434	0.0315	0.0692	0.0253
	Equalized_Odds	2.4739	0.0401	0.088	0.0145	2.4739	0.0401	0.088	0.0145	2.8058	0.0513	0.1168	0.0265	2.8348	0.0821	0.1134	0.0287	2.4808	0.0688	0.088	0.0158	2.4808	0.0688	0.088	0.0158	2.3434	0.0315	0.0874	0.0171	2.3434	0.0315	0.0874	0.0171
	Overall_Acc_Equality	2.4739	0.0401	0.0123	0.0086	2.4739	0.0401	0.0123	0.0086	2.8058	0.0513	0.0184	0.0087	2.8058	0.0513	0.0184	0.0087	2.4808	0.0688	0.0093	0.0064	2.4808	0.0688	0.0093	0.0064	2.3434	0.0315	0.0103	0.0053	2.3434	0.0315	0.0103	0.0053
	Predictive_Equality	2.4739	0.0401	0.0818	0.0122	2.4739	0.0401	0.0818	0.0122	2.8058	0.0513	0.0777	0.0128	2.8058	0.0513	0.0777	0.0128	2.4808	0.0688	0.0814	0.0128	2.4808	0.0688	0.0814	0.0128	2.3434	0.0315	0.0839	0.0091	2.3434	0.0315	0.0839	0.0091
	Predictive_Parity	2.4682	0.032	0.0433	0.0131	2.4682	0.032	0.0433	0.0131	2.8058	0.0513	0.0514	0.0153	2.8058	0.0513	0.0514	0.0153	2.4946	0.0636	0.0487	0.0133	2.4946	0.0636	0.0487	0.0133	2.3434	0.0315	0.0521	0.0111	2.3434	0.0315	0.0521	0.0111
0.8	Disparate_Impact	2.4654	0.0421	0.798	0.0174	2.5649	0.1131	0.8019	0.0213	2.6365	0.0592	0.7836	0.0285	2.8385	0.2394	0.7972	0.038	2.474	0.0674	0.8	0.0184	2.6393	0.2745	0.8065	0.0269	2.3434	0.0315	0.7775	0.0165	2.4939	0.1229	0.796	0.0315
