# Supplementary material
Source: ML conference proceedings conference paper supplement (https://openreview.net/forum?id=xiQNfYl33p)
Supplement: supplementary_material [file Pokec_n_region_False.xlsx]

## Sheet: Sheet1
		stats
	cp_method	aps								cfgnn								daps								tps
	type	base				ours				base				ours				base				ours				base				ours
	stat_type	eff_mean	eff_std	violation_mean	violation_std	eff_mean	eff_std	violation_mean	violation_std	eff_mean	eff_std	violation_mean	violation_std	eff_mean	eff_std	violation_mean	violation_std	eff_mean	eff_std	violation_mean	violation_std	eff_mean	eff_std	violation_mean	violation_std	eff_mean	eff_std	violation_mean	violation_std	eff_mean	eff_std	violation_mean	violation_std
c	fairness_metric
0.05	Demographic_Parity	2.4014	0.0433	0.0769	0.0105	3.3724	0.0735	0.0475	0.0158	3.1684	0.0429	0.0375	0.0175	3.2359	0.1611	0.0357	0.0172	2.4133	0.0319	0.0712	0.0112	3.2284	0.3457	0.0586	0.0216	2.3003	0.0277	0.0773	0.0155	3.3812	0.1001	0.0548	0.0142
	Equal_Opportunity	2.4014	0.0433	0.0848	0.0361	2.873	0.3396	0.0545	0.0383	3.1684	0.0429	0.0584	0.0247	3.4605	0.2985	0.0475	0.0319	2.4133	0.0319	0.078	0.0297	3.1039	0.325	0.0435	0.032	2.3003	0.0277	0.0922	0.0182	2.7341	0.3592	0.0519	0.0304
	Equalized_Odds	2.4014	0.0433	0.0972	0.0245	3.4217	0.1174	0.0439	0.0163	3.1684	0.0429	0.0618	0.0227	3.5073	0.2941	0.0552	0.0313	2.4133	0.0319	0.0828	0.0267	3.407	0.2034	0.0499	0.0205	2.3003	0.0277	0.0941	0.0177	3.3167	0.1314	0.0647	0.0196
	Overall_Acc_Equality	2.4014	0.0433	0.0105	0.0091	2.4014	0.0433	0.0105	0.0091	3.1684	0.0429	0.0258	0.0087	3.1684	0.0429	0.0258	0.0087	2.4133	0.0319	0.0079	0.0071	2.4133	0.0319	0.0079	0.0071	2.3003	0.0277	0.0162	0.0064	2.3003	0.0277	0.0162	0.0064
	Predictive_Equality	2.4014	0.0433	0.0729	0.0128	3.3933	0.0943	0.0475	0.0151	3.1684	0.0414	0.0389	0.0179	3.2776	0.1828	0.0411	0.0195	2.4133	0.0307	0.0639	0.0134	3.1437	0.4406	0.0564	0.0216	2.3003	0.0277	0.0685	0.0164	3.2256	0.3429	0.0648	0.0187
	Predictive_Parity	2.4157	0.0324	0.0559	0.0165	2.8312	0.2274	0.0422	0.0254	3.1684	0.0429	0.0291	0.0019	3.836	0.1108	0.034	0.0051	2.378	0.061	0.055	0.0135	2.7615	0.362	0.0403	0.0259	2.3003	0.0277	0.0654	0.0186	2.7888	0.2281	0.0481	0.0229
0.1	Demographic_Parity	2.4157	0.0324	0.0708	0.0121	2.4622	0.1603	0.0712	0.0112	3.1916	0.0549	0.0247	0.0106	3.1916	0.0549	0.0247	0.0106	2.378	0.061	0.0709	0.0095	2.4864	0.2579	0.0704	0.009	2.3003	0.0277	0.0773	0.0155	2.303	0.0298	0.0773	0.0151
	Equal_Opportunity	2.4157	0.0324	0.0741	0.0309	2.4995	0.1262	0.0652	0.0209	3.1916	0.0549	0.0513	0.0288	3.2159	0.0885	0.0479	0.0283	2.378	0.061	0.0751	0.0251	2.554	0.3454	0.0631	0.0309	2.3003	0.0277	0.0922	0.0182	2.3292	0.0627	0.0808	0.0264
	Equalized_Odds	2.4157	0.0324	0.0844	0.0195	2.5692	0.2215	0.073	0.019	3.1916	0.0549	0.0536	0.0263	3.2158	0.0883	0.0502	0.026	2.378	0.061	0.0806	0.0157	2.5608	0.3455	0.0791	0.0205	2.3003	0.0277	0.0941	0.0177	2.3292	0.0627	0.0895	0.016
	Overall_Acc_Equality	2.4157	0.0324	0.0077	0.0066	2.4157	0.0324	0.0077	0.0066	3.1916	0.0549	0.0208	0.007	3.1916	0.0549	0.0208	0.007	2.378	0.061	0.0112	0.0098	2.378	0.061	0.0112	0.0098	2.3003	0.0277	0.0162	0.0064	2.3003	0.0277	0.0162	0.0064
	Predictive_Equality	2.4157	0.0324	0.064	0.0132	2.4622	0.1603	0.0644	0.0124	3.1684	0.0429	0.0389	0.0185	3.1684	0.0429	0.0389	0.0185	2.4133	0.0319	0.0639	0.0138	2.5121	0.2107	0.0674	0.0143	2.3003	0.0277	0.0685	0.0164	2.3003	0.0277	0.0685	0.0164
	Predictive_Parity	2.41	0.025	0.0607	0.0164	2.4352	0.0936	0.0599	0.0183	3.1916	0.0549	0.0412	0.0143	3.2	0.0595	0.0405	0.0136	2.4054	0.0586	0.0593	0.0188	2.4709	0.1606	0.0531	0.0235	2.3003	0.0277	0.0654	0.0186	2.3198	0.0759	0.0642	0.0215
0.15	Demographic_Parity	2.41	0.025	0.0699	0.0111	2.41	0.025	0.0699	0.0111	3.1945	0.0249	0.0257	0.0118	3.1945	0.0249	0.0257	0.0118	2.4054	0.0586	0.0763	0.013	2.4054	0.0586	0.0763	0.013	2.3003	0.0277	0.0773	0.0155	2.3003	0.0277	0.0773	0.0155
	Equal_Opportunity	2.41	0.025	0.0745	0.0324	2.4327	0.0869	0.0716	0.035	3.1945	0.0249	0.0738	0.0255	3.1945	0.0249	0.0738	0.0255	2.4054	0.0586	0.0811	0.0333	2.4152	0.0591	0.078	0.0328	2.3003	0.0277	0.0922	0.0182	2.3028	0.0332	0.0921	0.0183
	Equalized_Odds	2.41	0.025	0.0849	0.0196	2.4327	0.0869	0.0847	0.0198	3.1945	0.0249	0.0754	0.0226	3.1945	0.0249	0.0754	0.0226	2.4054	0.0586	0.0925	0.0243	2.4152	0.0591	0.0914	0.0232	2.3003	0.0277	0.0941	0.0177	2.3028	0.0332	0.0943	0.0174
	Overall_Acc_Equality	2.41	0.025	0.0122	0.0052	2.41	0.025	0.0122	0.0052	3.1945	0.0249	0.0254	0.0072	3.1945	0.0249	0.0254	0.0072	2.4054	0.0586	0.0079	0.0091	2.4054	0.0586	0.0079	0.0091	2.3003	0.0277	0.0162	0.0064	2.3003	0.0277	0.0162	0.0064
	Predictive_Equality	2.41	0.025	0.0647	0.0131	2.41	0.025	0.0647	0.0131	3.1916	0.0535	0.0236	0.0091	3.1916	0.0535	0.0236	0.0091	2.378	0.0594	0.0641	0.009	2.378	0.0594	0.0641	0.009	2.3003	0.0277	0.0685	0.0164	2.3003	0.0277	0.0685	0.0164
	Predictive_Parity	2.4044	0.0324	0.0571	0.0139	2.4044	0.0324	0.0571	0.0139	3.1945	0.0249	0.0355	0.0135	3.1945	0.0249	0.0355	0.0135	2.4091	0.0406	0.0583	0.0159	2.4091	0.0406	0.0583	0.0159	2.3003	0.0277	0.0654	0.0186	2.3003	0.0277	0.0654	0.0186
0.2	Demographic_Parity	2.4044	0.0324	0.0746	0.0175	2.4044	0.0324	0.0746	0.0175	3.1737	0.0361	0.0235	0.0135	3.1737	0.0361	0.0235	0.0135	2.4091	0.0406	0.0797	0.0177	2.4091	0.0406	0.0797	0.0177	2.3003	0.0277	0.0773	0.0155	2.3003	0.0277	0.0773	0.0155
	Equal_Opportunity	2.4044	0.0324	0.08	0.0437	2.4044	0.0324	0.08	0.0437	3.1737	0.0361	0.0564	0.0352	3.1737	0.0361	0.0564	0.0352	2.4091	0.0406	0.0834	0.0378	2.4091	0.0406	0.0834	0.0378	2.3003	0.0277	0.0922	0.0182	2.3003	0.0277	0.0922	0.0182
	Equalized_Odds	2.4044	0.0324	0.0915	0.0359	2.4044	0.0324	0.0915	0.0359	3.1736	0.0362	0.0581	0.033	3.1736	0.0362	0.0581	0.033	2.4091	0.0406	0.0965	0.0322	2.4091	0.0406	0.0965	0.0322	2.3003	0.0277	0.0941	0.0177	2.3003	0.0277	0.0941	0.0177
	Overall_Acc_Equality	2.4044	0.0324	0.0081	0.0084	2.4044	0.0324	0.0081	0.0084	3.1736	0.0362	0.0211	0.0091	3.1736	0.0362	0.0211	0.0091	2.4091	0.0406	0.0086	0.0066	2.4091	0.0406	0.0086	0.0066	2.3003	0.0277	0.0162	0.0064	2.3003	0.0277	0.0162	0.0064
	Predictive_Equality	2.4044	0.0324	0.0647	0.0176	2.4044	0.0324	0.0647	0.0176	3.1945	0.0249	0.0281	0.0121	3.1945	0.0249	0.0281	0.0121	2.4054	0.0586	0.0732	0.0133	2.4054	0.0586	0.0732	0.0133	2.3003	0.0277	0.0685	0.0164	2.3003	0.0277	0.0685	0.0164
	Predictive_Parity	2.4156	0.0228	0.0607	0.0147	2.4156	0.0228	0.0607	0.0147	3.1736	0.0362	0.0435	0.0198	3.1736	0.0362	0.0435	0.0198	2.4003	0.0527	0.0579	0.0188	2.4003	0.0527	0.0579	0.0188	2.3003	0.0277	0.0654	0.0186	2.3003	0.0277	0.0654	0.0186
0.8	Disparate_Impact	2.4014	0.0433	0.8144	0.0222	2.4983	0.1816	0.8228	0.023	3.1684	0.0429	0.9157	0.0635	3.1848	0.0828	0.9178	0.0614	2.4133	0.0319	0.8218	0.0261	2.5842	0.2498	0.8312	0.0394	2.3003	0.0277	0.8031	0.0339	2.4259	0.2489	0.8136	0.0482
