# Supplementary material
Source: ML conference proceedings conference paper supplement (https://openreview.net/forum?id=xiQNfYl33p)
Supplement: supplementary_material [file Pokec_n_region_gender_True.xlsx]

## Sheet: Sheet1
		stats
	cp_method	aps								cfgnn								daps								tps
	type	base				ours				base				ours				base				ours				base				ours
	stat_type	eff_mean	eff_std	violation_mean	violation_std	eff_mean	eff_std	violation_mean	violation_std	eff_mean	eff_std	violation_mean	violation_std	eff_mean	eff_std	violation_mean	violation_std	eff_mean	eff_std	violation_mean	violation_std	eff_mean	eff_std	violation_mean	violation_std	eff_mean	eff_std	violation_mean	violation_std	eff_mean	eff_std	violation_mean	violation_std
c	fairness_metric
0.05	Demographic_Parity	2.4851	0.0504	0.1602	0.022	3.3507	0.1116	0.0787	0.0128	2.5372	0.0812	0.1992	0.0154	3.6151	0.0643	0.0691	0.0238	2.5091	0.0544	0.166	0.0317	3.4518	0.1296	0.0716	0.0194	2.3412	0.0512	0.1585	0.0215	3.368	0.1322	0.0733	0.018
	Equal_Opportunity	2.4851	0.0504	0.1518	0.0524	3.2104	0.1646	0.0972	0.0348	2.5372	0.0812	0.1716	0.0381	3.4847	0.1842	0.0748	0.0681	2.5091	0.0544	0.1516	0.0352	3.3983	0.1541	0.0634	0.0333	2.3412	0.0512	0.1093	0.0528	3.0183	0.1425	0.086	0.0388
	Equalized_Odds	2.4851	0.0504	0.1751	0.0218	3.5852	0.0793	0.0926	0.0243	2.5372	0.0812	0.1951	0.0229	3.8318	0.0579	0.0556	0.032	2.5091	0.0544	0.1709	0.0303	3.7013	0.1164	0.0647	0.0195	2.3412	0.0512	0.1584	0.0311	3.6555	0.0784	0.0841	0.0334
	Overall_Acc_Equality	2.4851	0.0504	0.0296	0.0097	2.4851	0.0504	0.0296	0.0097	2.5372	0.0812	0.0453	0.0093	2.542	0.0774	0.0451	0.0095	2.5091	0.0544	0.0301	0.0104	2.5175	0.0576	0.0306	0.0099	2.3412	0.0512	0.0384	0.0109	2.3414	0.0513	0.0384	0.0109
	Predictive_Equality	2.4851	0.0504	0.1472	0.0211	3.3425	0.1522	0.0853	0.0258	2.5372	0.0812	0.1879	0.0165	3.6797	0.089	0.0635	0.0261	2.5091	0.0544	0.1518	0.0339	3.4602	0.1566	0.0851	0.027	2.3412	0.0512	0.145	0.0208	3.4042	0.1355	0.0745	0.0185
	Predictive_Parity	2.4849	0.0499	0.0552	0.0155	2.527	0.0554	0.05	0.015	2.5372	0.0812	0.1188	0.0133	3.8919	0.0349	0.086	0	2.4861	0.0659	0.054	0.0151	2.7636	0.1184	0.0284	0.0055	2.3412	0.0512	0.066	0.013	2.3934	0.0449	0.0458	0.014
0.1	Demographic_Parity	2.4849	0.0499	0.1531	0.0242	3.0045	0.0966	0.1254	0.0276	2.5811	0.0615	0.1635	0.0211	3.1283	0.195	0.1068	0.0131	2.4861	0.0659	0.1609	0.0285	2.903	0.1598	0.1355	0.0354	2.3412	0.0512	0.1585	0.0215	2.819	0.19	0.1336	0.0269
	Equal_Opportunity	2.4849	0.0499	0.1513	0.0423	2.6991	0.185	0.1444	0.0442	2.5811	0.0615	0.1565	0.0395	3.0232	0.2098	0.1008	0.0262	2.4861	0.0659	0.1477	0.0439	3.0076	0.1332	0.1087	0.044	2.3412	0.0512	0.1093	0.0528	2.4127	0.095	0.1066	0.0444
	Equalized_Odds	2.4849	0.0499	0.161	0.0346	3.0579	0.1717	0.137	0.0427	2.5811	0.0615	0.1755	0.0214	3.3768	0.2007	0.1092	0.022	2.4861	0.0659	0.1672	0.0352	3.1649	0.1565	0.1303	0.0311	2.3412	0.0512	0.1584	0.0311	2.7979	0.1952	0.135	0.0256
	Overall_Acc_Equality	2.4849	0.0499	0.0315	0.0135	2.4849	0.0499	0.0315	0.0135	2.5811	0.0615	0.0396	0.0079	2.5811	0.0615	0.0396	0.0079	2.4861	0.0659	0.0279	0.0101	2.4861	0.0659	0.0279	0.0101	2.3412	0.0512	0.0384	0.0109	2.3412	0.0512	0.0384	0.0109
	Predictive_Equality	2.4849	0.0499	0.1396	0.0254	2.9372	0.1075	0.1225	0.0255	2.5811	0.0615	0.1562	0.0208	3.1719	0.1974	0.1181	0.0141	2.4861	0.0659	0.1478	0.0302	2.8653	0.2086	0.1363	0.038	2.3412	0.0512	0.145	0.0208	2.6821	0.258	0.136	0.0256
	Predictive_Parity	2.473	0.042	0.0522	0.0106	2.473	0.042	0.0522	0.0106	2.5811	0.0615	0.1144	0.0143	3.5548	0.0335	0.0862	0.0015	2.5101	0.0597	0.0558	0.0135	2.5186	0.0683	0.0541	0.0144	2.3412	0.0512	0.066	0.013	2.3412	0.0512	0.066	0.013
0.15	Demographic_Parity	2.473	0.042	0.1531	0.0243	2.5937	0.1839	0.154	0.0236	2.6202	0.0695	0.1322	0.0098	2.6586	0.0688	0.131	0.0105	2.5101	0.0597	0.1713	0.0251	2.6986	0.1918	0.1549	0.0304	2.3412	0.0512	0.1585	0.0215	2.4016	0.1541	0.1583	0.0219
	Equal_Opportunity	2.473	0.042	0.1522	0.0383	2.5252	0.0726	0.1449	0.0413	2.6202	0.0695	0.1472	0.039	2.7429	0.0914	0.1377	0.0359	2.5101	0.0597	0.1513	0.038	2.7428	0.168	0.1224	0.03	2.3412	0.0512	0.1093	0.0528	2.3421	0.0499	0.1093	0.0528
	Equalized_Odds	2.473	0.042	0.1617	0.0299	2.6376	0.1921	0.1564	0.0328	2.6202	0.0695	0.1542	0.0303	2.8016	0.1324	0.1439	0.0269	2.5101	0.0597	0.1775	0.022	2.8373	0.2121	0.1467	0.0309	2.3412	0.0512	0.1584	0.0311	2.3439	0.0516	0.156	0.0249
	Overall_Acc_Equality	2.473	0.042	0.0276	0.0112	2.473	0.042	0.0276	0.0112	2.6202	0.0695	0.0363	0.0118	2.6202	0.0695	0.0363	0.0118	2.5101	0.0597	0.0245	0.007	2.5101	0.0597	0.0245	0.007	2.3412	0.0512	0.0384	0.0109	2.3412	0.0512	0.0384	0.0109
	Predictive_Equality	2.473	0.042	0.1351	0.0251	2.5737	0.1743	0.1378	0.0235	2.6202	0.0695	0.1312	0.012	2.6939	0.0923	0.1304	0.0107	2.5101	0.0597	0.1596	0.0294	2.6747	0.1835	0.148	0.0315	2.3412	0.0512	0.145	0.0208	2.343	0.0528	0.1454	0.0202
	Predictive_Parity	2.4854	0.0439	0.0516	0.0136	2.4854	0.0439	0.0516	0.0136	2.6202	0.0695	0.1034	0.0188	3.0021	0.0816	0.0958	0.0175	2.4837	0.0875	0.0531	0.0147	2.4837	0.0875	0.0531	0.0147	2.3412	0.0512	0.066	0.013	2.3412	0.0512	0.066	0.013
0.2	Demographic_Parity	2.4854	0.0439	0.1542	0.0251	2.4953	0.0542	0.1542	0.0251	2.6557	0.0613	0.1201	0.0153	2.6557	0.0613	0.1201	0.0153	2.4837	0.0875	0.1712	0.0354	2.5202	0.0978	0.1644	0.0313	2.3412	0.0512	0.1585	0.0215	2.3412	0.0512	0.1585	0.0215
	Equal_Opportunity	2.4854	0.0439	0.1327	0.0358	2.4951	0.035	0.1327	0.0358	2.6557	0.0613	0.135	0.0413	2.7142	0.0648	0.125	0.0473	2.4837	0.0875	0.1479	0.0266	2.5715	0.1409	0.1359	0.0346	2.3412	0.0512	0.1093	0.0528	2.3412	0.0512	0.1093	0.0528
	Equalized_Odds	2.4854	0.0439	0.1532	0.0243	2.5043	0.0436	0.156	0.0215	2.6557	0.0613	0.1531	0.0148	2.7144	0.065	0.1496	0.0205	2.4837	0.0875	0.1778	0.0265	2.5831	0.15	0.1709	0.0306	2.3412	0.0512	0.1584	0.0311	2.3412	0.0512	0.1584	0.0311
	Overall_Acc_Equality	2.4854	0.0439	0.0288	0.0082	2.4854	0.0439	0.0288	0.0082	2.6557	0.0613	0.0383	0.0103	2.6557	0.0613	0.0383	0.0103	2.4837	0.0875	0.0272	0.0105	2.4837	0.0875	0.0272	0.0105	2.3412	0.0512	0.0384	0.0109	2.3412	0.0512	0.0384	0.0109
	Predictive_Equality	2.4854	0.0439	0.1388	0.0244	2.4946	0.053	0.1388	0.0244	2.6557	0.0613	0.1283	0.0198	2.6557	0.0613	0.1283	0.0198	2.4837	0.0875	0.1583	0.0426	2.4977	0.0916	0.1579	0.0419	2.3412	0.0512	0.145	0.0208	2.3412	0.0512	0.145	0.0208
	Predictive_Parity	2.493	0.0586	0.0512	0.0137	2.493	0.0586	0.0512	0.0137	2.6557	0.0613	0.1135	0.0227	2.7157	0.0422	0.1078	0.0223	2.4797	0.064	0.057	0.0114	2.4797	0.064	0.057	0.0114	2.3412	0.0512	0.066	0.013	2.3412	0.0512	0.066	0.013
0.8	Disparate_Impact	2.4851	0.0504	0.7179	0.0369	2.7385	0.1462	0.7669	0.0513	2.5372	0.0812	0.6024	0.0437	2.9644	0.1375	0.7793	0.0441	2.5091	0.0544	0.7204	0.0359	2.7088	0.1667	0.7639	0.0621	2.3412	0.0512	0.7164	0.0365	2.5656	0.1732	0.7537	0.051
