# Supplementary material
Source: ML conference proceedings conference paper supplement (https://openreview.net/forum?id=xiQNfYl33p)
Supplement: supplementary_material [file Pokec_z_gender_False.xlsx]

## Sheet: Sheet1
		stats
	cp_method	aps								cfgnn								daps								tps
	type	base				ours				base				ours				base				ours				base				ours
	stat_type	eff_mean	eff_std	violation_mean	violation_std	eff_mean	eff_std	violation_mean	violation_std	eff_mean	eff_std	violation_mean	violation_std	eff_mean	eff_std	violation_mean	violation_std	eff_mean	eff_std	violation_mean	violation_std	eff_mean	eff_std	violation_mean	violation_std	eff_mean	eff_std	violation_mean	violation_std	eff_mean	eff_std	violation_mean	violation_std
c	fairness_metric
0.05	Demographic_Parity	2.5233	0.0455	0.1332	0.0149	3.6754	0.1014	0.0569	0.0269	2.5122	0.0851	0.1458	0.0095	3.6828	0.1348	0.0586	0.0406	2.5218	0.0568	0.132	0.0148	3.6805	0.1284	0.0541	0.0342	2.3272	0.0304	0.1446	0.0106	3.7151	0.0483	0.0559	0.0272
	Equal_Opportunity	2.5233	0.0455	0.0655	0.0322	2.7349	0.3574	0.0623	0.0369	2.5122	0.0851	0.0945	0.0465	3.0279	0.3437	0.0517	0.038	2.5218	0.0568	0.047	0.0222	2.9284	0.3439	0.0485	0.0272	2.3272	0.0304	0.0838	0.0249	2.7298	0.272	0.0669	0.0418
	Equalized_Odds	2.5233	0.0455	0.131	0.0184	3.6656	0.1121	0.0577	0.031	2.5122	0.0851	0.1451	0.0141	3.6484	0.1508	0.0592	0.0478	2.5218	0.0568	0.1293	0.0174	3.596	0.1884	0.066	0.0416	2.3272	0.0304	0.144	0.0132	3.6842	0.1095	0.0597	0.0399
	Overall_Acc_Equality	2.5233	0.0455	0.0294	0.0126	2.5233	0.0455	0.0294	0.0126	2.5122	0.0851	0.0081	0.006	2.5122	0.0851	0.0081	0.006	2.5218	0.0568	0.0299	0.0075	2.5218	0.0568	0.0299	0.0075	2.3272	0.0304	0.0127	0.0077	2.3272	0.0304	0.0127	0.0077
	Predictive_Equality	2.5233	0.0455	0.131	0.0184	3.6568	0.1175	0.0604	0.0318	2.5122	0.0851	0.1397	0.011	3.6612	0.1642	0.0605	0.0461	2.5218	0.0568	0.1293	0.0174	3.5877	0.192	0.067	0.042	2.3272	0.0304	0.144	0.0132	3.6842	0.1095	0.0597	0.0399
	Predictive_Parity	2.52	0.028	0.0711	0.0156	2.9644	0.249	0.0543	0.023	2.5122	0.0851	0.0809	0.014	4	0	0.051	0	2.5182	0.0498	0.0724	0.0163	3.0869	0.3397	0.0438	0.0283	2.3272	0.0304	0.0949	0.013	3.1273	0.2286	0.0532	0.0231
0.1	Demographic_Parity	2.52	0.028	0.1347	0.0158	3.2441	0.2819	0.1101	0.0268	2.579	0.0444	0.1495	0.0088	3.4967	0.1308	0.1019	0.0291	2.5182	0.0498	0.1354	0.0159	3.2777	0.3181	0.0939	0.0363	2.3272	0.0304	0.1446	0.0106	3.3485	0.2328	0.103	0.0288
	Equal_Opportunity	2.52	0.028	0.0606	0.0212	2.56	0.1225	0.0558	0.0256	2.579	0.0444	0.0528	0.0171	2.6483	0.2256	0.0518	0.0171	2.5182	0.0498	0.0639	0.0426	2.5362	0.0658	0.0616	0.0392	2.3272	0.0304	0.0838	0.0249	2.3831	0.1049	0.0882	0.0208
	Equalized_Odds	2.52	0.028	0.133	0.0188	3.232	0.2865	0.1084	0.0303	2.579	0.0444	0.146	0.0116	3.4989	0.1432	0.1011	0.0344	2.5182	0.0498	0.1367	0.0211	3.2376	0.4068	0.092	0.0432	2.3272	0.0304	0.144	0.0132	3.2945	0.3249	0.1028	0.0317
	Overall_Acc_Equality	2.52	0.028	0.0318	0.0094	2.52	0.028	0.0318	0.0094	2.579	0.0444	0.0094	0.0065	2.579	0.0444	0.0094	0.0065	2.5182	0.0498	0.028	0.0106	2.5182	0.0498	0.028	0.0106	2.3272	0.0304	0.0127	0.0077	2.3272	0.0304	0.0127	0.0077
	Predictive_Equality	2.52	0.028	0.133	0.0188	3.2313	0.286	0.1086	0.03	2.579	0.0444	0.146	0.0116	3.4431	0.3165	0.1024	0.0408	2.5182	0.0498	0.1334	0.019	3.2237	0.4172	0.0932	0.0422	2.3272	0.0304	0.144	0.0132	3.2945	0.3249	0.1028	0.0317
	Predictive_Parity	2.5248	0.0307	0.0722	0.0154	2.5248	0.0307	0.0722	0.0154	2.579	0.0444	0.0795	0.0142	3.6042	0.0655	0.0527	0.0014	2.5147	0.0532	0.0739	0.0177	2.572	0.157	0.0714	0.0198	2.3272	0.0304	0.0949	0.013	2.3407	0.0418	0.0936	0.0148
0.15	Demographic_Parity	2.5248	0.0307	0.1352	0.016	2.5248	0.0307	0.1352	0.016	2.6188	0.0482	0.152	0.0103	2.822	0.2821	0.1477	0.0161	2.5147	0.0532	0.1355	0.0167	2.5402	0.1067	0.1353	0.0168	2.3272	0.0304	0.1446	0.0106	2.3293	0.0317	0.1446	0.0106
	Equal_Opportunity	2.5248	0.0307	0.0508	0.022	2.5248	0.0307	0.0508	0.022	2.6188	0.0482	0.0625	0.0344	2.6188	0.0482	0.0625	0.0344	2.5147	0.0532	0.0746	0.0381	2.5344	0.079	0.0692	0.0387	2.3272	0.0304	0.0838	0.0249	2.3373	0.046	0.084	0.0244
	Equalized_Odds	2.5248	0.0307	0.1337	0.0197	2.5248	0.0307	0.1337	0.0197	2.6188	0.0482	0.1516	0.0109	2.8312	0.2902	0.1484	0.0166	2.5147	0.0532	0.1355	0.02	2.5884	0.1934	0.1339	0.0213	2.3272	0.0304	0.144	0.0132	2.3373	0.046	0.143	0.0148
	Overall_Acc_Equality	2.5248	0.0307	0.0295	0.0083	2.5248	0.0307	0.0295	0.0083	2.6188	0.0482	0.0085	0.0062	2.6188	0.0482	0.0085	0.0062	2.5147	0.0532	0.0208	0.0111	2.5147	0.0532	0.0208	0.0111	2.3272	0.0304	0.0127	0.0077	2.3272	0.0304	0.0127	0.0077
	Predictive_Equality	2.5248	0.0307	0.1337	0.0197	2.5248	0.0307	0.1337	0.0197	2.6188	0.0482	0.1516	0.0109	2.8303	0.2886	0.148	0.0173	2.5147	0.0532	0.1339	0.0203	2.5687	0.1906	0.1322	0.0215	2.3272	0.0304	0.144	0.0132	2.3293	0.0317	0.144	0.0132
	Predictive_Parity	2.5354	0.0228	0.0686	0.0167	2.5354	0.0228	0.0686	0.0167	2.6188	0.0482	0.08	0.0119	3.4144	0.0498	0.0577	0.0028	2.5138	0.0573	0.0711	0.0185	2.5138	0.0573	0.0711	0.0185	2.3272	0.0304	0.0949	0.013	2.3272	0.0304	0.0949	0.013
0.2	Demographic_Parity	2.5354	0.0228	0.1317	0.0155	2.5354	0.0228	0.1317	0.0155	2.6226	0.0303	0.1512	0.0078	2.6226	0.0303	0.1512	0.0078	2.5138	0.0573	0.1336	0.0168	2.5138	0.0573	0.1336	0.0168	2.3272	0.0304	0.1446	0.0106	2.3272	0.0304	0.1446	0.0106
	Equal_Opportunity	2.5354	0.0228	0.0537	0.0299	2.5354	0.0228	0.0537	0.0299	2.6226	0.0303	0.0809	0.0383	2.6226	0.0303	0.0809	0.0383	2.5138	0.0573	0.076	0.0323	2.5138	0.0573	0.076	0.0323	2.3272	0.0304	0.0838	0.0249	2.3272	0.0304	0.0838	0.0249
	Equalized_Odds	2.5354	0.0228	0.1295	0.0192	2.5354	0.0228	0.1295	0.0192	2.6226	0.0303	0.1521	0.011	2.6226	0.0303	0.1521	0.011	2.5138	0.0573	0.1331	0.0219	2.5138	0.0573	0.1331	0.0219	2.3272	0.0304	0.144	0.0132	2.3272	0.0304	0.144	0.0132
	Overall_Acc_Equality	2.5354	0.0228	0.0252	0.0082	2.5354	0.0228	0.0252	0.0082	2.6226	0.0303	0.0094	0.0068	2.6226	0.0303	0.0094	0.0068	2.5138	0.0573	0.0251	0.0095	2.5138	0.0573	0.0251	0.0095	2.3272	0.0304	0.0127	0.0077	2.3272	0.0304	0.0127	0.0077
	Predictive_Equality	2.5354	0.0228	0.1295	0.0192	2.5354	0.0228	0.1295	0.0192	2.6226	0.0303	0.1518	0.0113	2.6226	0.0303	0.1518	0.0113	2.5138	0.0573	0.1315	0.0211	2.5138	0.0573	0.1315	0.0211	2.3272	0.0304	0.144	0.0132	2.3272	0.0304	0.144	0.0132
	Predictive_Parity	2.5115	0.0348	0.0706	0.0153	2.5115	0.0348	0.0706	0.0153	2.6226	0.0303	0.0776	0.0131	3.2443	0.1179	0.062	0.0114	2.544	0.0583	0.0702	0.0156	2.544	0.0583	0.0702	0.0156	2.3272	0.0304	0.0949	0.013	2.3272	0.0304	0.0949	0.013
0.8	Disparate_Impact	2.5233	0.0455	0.7512	0.0256	2.9951	0.2151	0.7902	0.0427	2.5122	0.0851	0.6823	0.0187	3.3879	0.1009	0.7997	0.0483	2.5218	0.0568	0.7537	0.0263	2.9956	0.3305	0.7974	0.0484	2.3272	0.0304	0.7159	0.0187	3.1336	0.1981	0.7898	0.0446
