# Supplementary material
Source: ML conference proceedings conference paper supplement (https://openreview.net/forum?id=xiQNfYl33p)
Supplement: supplementary_material [file Pokec_z_gender_True.xlsx]

## Sheet: Sheet1
		stats
	cp_method	aps								cfgnn								daps								tps
	type	base				ours				base				ours				base				ours				base				ours
	stat_type	eff_mean	eff_std	violation_mean	violation_std	eff_mean	eff_std	violation_mean	violation_std	eff_mean	eff_std	violation_mean	violation_std	eff_mean	eff_std	violation_mean	violation_std	eff_mean	eff_std	violation_mean	violation_std	eff_mean	eff_std	violation_mean	violation_std	eff_mean	eff_std	violation_mean	violation_std	eff_mean	eff_std	violation_mean	violation_std
c	fairness_metric
0.05	Demographic_Parity	2.5233	0.0455	0.1332	0.0149	2.885	0.2037	0.0589	0.0245	2.5122	0.0851	0.1458	0.0095	3.0376	0.1768	0.0716	0.0315	2.5218	0.0568	0.132	0.0148	2.8731	0.1848	0.0612	0.0275	2.3272	0.0304	0.1446	0.0106	2.73	0.0868	0.0636	0.0265
	Equal_Opportunity	2.5233	0.0455	0.0655	0.0322	2.616	0.1997	0.064	0.034	2.5122	0.0851	0.0945	0.0465	2.7545	0.1955	0.0747	0.0393	2.5218	0.0568	0.047	0.0222	2.7554	0.2617	0.0584	0.0268	2.3272	0.0304	0.0838	0.0249	2.4755	0.0835	0.0612	0.0354
	Equalized_Odds	2.5233	0.0455	0.131	0.0184	2.8851	0.2066	0.0797	0.0315	2.5122	0.0851	0.1451	0.0141	3.1283	0.2274	0.0812	0.0455	2.5218	0.0568	0.1293	0.0174	2.9918	0.3042	0.0872	0.0297	2.3272	0.0304	0.144	0.0132	2.7746	0.0821	0.0716	0.0388
	Overall_Acc_Equality	2.5233	0.0455	0.0294	0.0126	2.5233	0.0455	0.0294	0.0126	2.5122	0.0851	0.0081	0.006	2.5122	0.0851	0.0081	0.006	2.5218	0.0568	0.0299	0.0075	2.5218	0.0568	0.0299	0.0075	2.3272	0.0304	0.0127	0.0077	2.3272	0.0304	0.0127	0.0077
	Predictive_Equality	2.5233	0.0455	0.131	0.0184	2.7921	0.0914	0.063	0.0284	2.5122	0.0851	0.1397	0.011	3.032	0.2046	0.0769	0.0351	2.5218	0.0568	0.1293	0.0174	2.7626	0.1142	0.0681	0.0411	2.3272	0.0304	0.144	0.0132	2.6899	0.1043	0.079	0.0291
	Predictive_Parity	2.52	0.028	0.0711	0.0156	2.5791	0.053	0.0543	0.023	2.5122	0.0851	0.0809	0.014	3.5018	0.0727	0.051	0	2.5182	0.0498	0.0724	0.0163	2.6021	0.0855	0.0454	0.0276	2.3272	0.0304	0.0949	0.013	2.452	0.0528	0.0618	0.021
0.1	Demographic_Parity	2.52	0.028	0.1347	0.0158	2.6219	0.0663	0.1101	0.0268	2.579	0.0444	0.1495	0.0088	2.7669	0.0532	0.1016	0.0293	2.5182	0.0498	0.1354	0.0159	2.6423	0.0899	0.0939	0.0363	2.3272	0.0304	0.1446	0.0106	2.463	0.0645	0.103	0.0288
	Equal_Opportunity	2.52	0.028	0.0606	0.0212	2.5422	0.0691	0.0591	0.0215	2.579	0.0444	0.0528	0.0171	2.6019	0.0971	0.0503	0.0182	2.5182	0.0498	0.0639	0.0426	2.5269	0.0578	0.0616	0.0392	2.3272	0.0304	0.0838	0.0249	2.3543	0.0615	0.0871	0.024
	Equalized_Odds	2.52	0.028	0.133	0.0188	2.6422	0.0998	0.1086	0.03	2.579	0.0444	0.146	0.0116	2.7846	0.0638	0.105	0.0374	2.5182	0.0498	0.1367	0.0211	2.6491	0.1029	0.1023	0.0428	2.3272	0.0304	0.144	0.0132	2.4819	0.0929	0.1099	0.0261
	Overall_Acc_Equality	2.52	0.028	0.0318	0.0094	2.52	0.028	0.0318	0.0094	2.579	0.0444	0.0094	0.0065	2.579	0.0444	0.0094	0.0065	2.5182	0.0498	0.028	0.0106	2.5182	0.0498	0.028	0.0106	2.3272	0.0304	0.0127	0.0077	2.3272	0.0304	0.0127	0.0077
	Predictive_Equality	2.52	0.028	0.133	0.0188	2.62	0.0681	0.1086	0.03	2.579	0.0444	0.146	0.0116	2.7627	0.072	0.104	0.0377	2.5182	0.0498	0.1334	0.019	2.6404	0.1033	0.0934	0.0419	2.3272	0.0304	0.144	0.0132	2.4548	0.0712	0.104	0.0308
	Predictive_Parity	2.5248	0.0307	0.0722	0.0154	2.5248	0.0307	0.0722	0.0154	2.579	0.0444	0.0795	0.0142	2.8334	0.0368	0.0628	0.0068	2.5147	0.0532	0.0739	0.0177	2.5239	0.0581	0.0717	0.0197	2.3272	0.0304	0.0949	0.013	2.3282	0.0304	0.0936	0.0148
0.15	Demographic_Parity	2.5248	0.0307	0.1352	0.016	2.5248	0.0307	0.1352	0.016	2.6188	0.0482	0.152	0.0103	2.6409	0.0624	0.1477	0.0161	2.5147	0.0532	0.1355	0.0167	2.5171	0.0555	0.1353	0.0168	2.3272	0.0304	0.1446	0.0106	2.3273	0.0304	0.1446	0.0106
	Equal_Opportunity	2.5248	0.0307	0.0508	0.022	2.5248	0.0307	0.0508	0.022	2.6188	0.0482	0.0625	0.0344	2.6188	0.0482	0.0625	0.0344	2.5147	0.0532	0.0746	0.0381	2.5252	0.0607	0.0746	0.0381	2.3272	0.0304	0.0838	0.0249	2.3318	0.0348	0.084	0.0244
	Equalized_Odds	2.5248	0.0307	0.1337	0.0197	2.5248	0.0307	0.1337	0.0197	2.6188	0.0482	0.1516	0.0109	2.6425	0.0628	0.148	0.0173	2.5147	0.0532	0.1355	0.02	2.531	0.066	0.1338	0.0214	2.3272	0.0304	0.144	0.0132	2.3319	0.035	0.144	0.0132
	Overall_Acc_Equality	2.5248	0.0307	0.0295	0.0083	2.5248	0.0307	0.0295	0.0083	2.6188	0.0482	0.0085	0.0062	2.6188	0.0482	0.0085	0.0062	2.5147	0.0532	0.0208	0.0111	2.5147	0.0532	0.0208	0.0111	2.3272	0.0304	0.0127	0.0077	2.3272	0.0304	0.0127	0.0077
	Predictive_Equality	2.5248	0.0307	0.1337	0.0197	2.5248	0.0307	0.1337	0.0197	2.6188	0.0482	0.1516	0.0109	2.6425	0.0628	0.1481	0.0174	2.5147	0.0532	0.1339	0.0203	2.5205	0.0603	0.1322	0.0215	2.3272	0.0304	0.144	0.0132	2.3273	0.0304	0.144	0.0132
	Predictive_Parity	2.5354	0.0228	0.0686	0.0167	2.5354	0.0228	0.0686	0.0167	2.6188	0.0482	0.08	0.0119	2.7585	0.0484	0.0654	0.0056	2.5138	0.0573	0.0711	0.0185	2.5138	0.0573	0.0711	0.0185	2.3272	0.0304	0.0949	0.013	2.3272	0.0304	0.0949	0.013
0.2	Demographic_Parity	2.5354	0.0228	0.1317	0.0155	2.5354	0.0228	0.1317	0.0155	2.6226	0.0303	0.1512	0.0078	2.6226	0.0303	0.1512	0.0078	2.5138	0.0573	0.1336	0.0168	2.5138	0.0573	0.1336	0.0168	2.3272	0.0304	0.1446	0.0106	2.3272	0.0304	0.1446	0.0106
	Equal_Opportunity	2.5354	0.0228	0.0537	0.0299	2.5354	0.0228	0.0537	0.0299	2.6226	0.0303	0.0809	0.0383	2.6226	0.0303	0.0809	0.0383	2.5138	0.0573	0.076	0.0323	2.5138	0.0573	0.076	0.0323	2.3272	0.0304	0.0838	0.0249	2.3272	0.0304	0.0838	0.0249
	Equalized_Odds	2.5354	0.0228	0.1295	0.0192	2.5354	0.0228	0.1295	0.0192	2.6226	0.0303	0.1521	0.011	2.6226	0.0303	0.1521	0.011	2.5138	0.0573	0.1331	0.0219	2.5138	0.0573	0.1331	0.0219	2.3272	0.0304	0.144	0.0132	2.3272	0.0304	0.144	0.0132
	Overall_Acc_Equality	2.5354	0.0228	0.0252	0.0082	2.5354	0.0228	0.0252	0.0082	2.6226	0.0303	0.0094	0.0068	2.6226	0.0303	0.0094	0.0068	2.5138	0.0573	0.0251	0.0095	2.5138	0.0573	0.0251	0.0095	2.3272	0.0304	0.0127	0.0077	2.3272	0.0304	0.0127	0.0077
	Predictive_Equality	2.5354	0.0228	0.1295	0.0192	2.5354	0.0228	0.1295	0.0192	2.6226	0.0303	0.1518	0.0113	2.6226	0.0303	0.1518	0.0113	2.5138	0.0573	0.1315	0.0211	2.5138	0.0573	0.1315	0.0211	2.3272	0.0304	0.144	0.0132	2.3272	0.0304	0.144	0.0132
	Predictive_Parity	2.5115	0.0348	0.0706	0.0153	2.5115	0.0348	0.0706	0.0153	2.6226	0.0303	0.0776	0.0131	2.7083	0.0417	0.0668	0.0113	2.544	0.0583	0.0702	0.0156	2.544	0.0583	0.0702	0.0156	2.3272	0.0304	0.0949	0.013	2.3272	0.0304	0.0949	0.013
0.8	Disparate_Impact	2.5233	0.0455	0.7512	0.0256	2.5716	0.0551	0.7902	0.0427	2.5122	0.0851	0.6823	0.0187	2.6418	0.0927	0.7998	0.0485	2.5218	0.0568	0.7537	0.0263	2.579	0.0801	0.7947	0.0478	2.3272	0.0304	0.7159	0.0187	2.4149	0.047	0.7898	0.0446
