# Supplementary material
Source: ML conference proceedings conference paper supplement (https://openreview.net/forum?id=xiQNfYl33p)
Supplement: supplementary_material [file Pokec_z_region_False.xlsx]

## Sheet: Sheet1
		stats
	cp_method	aps								cfgnn								daps								tps
	type	base				ours				base				ours				base				ours				base				ours
	stat_type	eff_mean	eff_std	violation_mean	violation_std	eff_mean	eff_std	violation_mean	violation_std	eff_mean	eff_std	violation_mean	violation_std	eff_mean	eff_std	violation_mean	violation_std	eff_mean	eff_std	violation_mean	violation_std	eff_mean	eff_std	violation_mean	violation_std	eff_mean	eff_std	violation_mean	violation_std	eff_mean	eff_std	violation_mean	violation_std
c	fairness_metric
0.05	Demographic_Parity	2.4294	0.0234	0.1095	0.0189	3.3343	0.0655	0.0422	0.019	2.5455	0.0668	0.0964	0.0128	3.1882	0.2826	0.0559	0.0316	2.4156	0.0386	0.1061	0.0143	3.2656	0.1466	0.0607	0.0272	2.3367	0.0217	0.1106	0.0107	3.3057	0.0406	0.0504	0.014
	Equal_Opportunity	2.4294	0.0234	0.1154	0.0464	2.7398	0.1871	0.0794	0.0228	2.5455	0.0668	0.0881	0.0155	3.0796	0.4365	0.0655	0.0507	2.4156	0.0386	0.0945	0.0312	3.0167	0.3625	0.0434	0.0274	2.3367	0.0217	0.16	0.0289	3.0794	0.1414	0.0435	0.0276
	Equalized_Odds	2.4294	0.0234	0.1301	0.0382	3.3442	0.0709	0.0448	0.0207	2.5455	0.0668	0.0988	0.0138	3.3741	0.3606	0.051	0.0364	2.4156	0.0386	0.1111	0.0217	3.3742	0.1744	0.0492	0.0225	2.3367	0.0217	0.1602	0.0285	3.3073	0.0449	0.0534	0.0157
	Overall_Acc_Equality	2.4294	0.0234	0.0234	0.0094	2.4294	0.0234	0.0234	0.0094	2.5455	0.0668	0.0075	0.0052	2.5455	0.0668	0.0075	0.0052	2.4156	0.0386	0.0163	0.0123	2.4156	0.0386	0.0163	0.0123	2.3367	0.0217	0.031	0.0081	2.3367	0.0217	0.031	0.0081
	Predictive_Equality	2.4294	0.0234	0.1046	0.0193	3.3401	0.0788	0.0422	0.0223	2.5455	0.0668	0.091	0.0178	3.1872	0.324	0.0639	0.0331	2.4156	0.0386	0.1001	0.0158	3.291	0.2227	0.0621	0.0321	2.3367	0.0217	0.1064	0.0117	3.3073	0.0449	0.0534	0.0157
	Predictive_Parity	2.4507	0.0368	0.0534	0.018	2.7888	0.2685	0.0424	0.0238	2.5455	0.0668	0.041	0.0093	3.7677	0.0638	0.0375	0.0024	2.4087	0.066	0.0528	0.0168	2.7603	0.33	0.0411	0.0267	2.3367	0.0217	0.0578	0.0169	2.6652	0.2743	0.0483	0.021
0.1	Demographic_Parity	2.4507	0.0368	0.1031	0.0191	2.9596	0.2009	0.0965	0.0213	2.5558	0.0768	0.0881	0.0184	2.5769	0.1147	0.0882	0.0187	2.4087	0.066	0.1084	0.0127	2.6734	0.3551	0.1006	0.0183	2.3367	0.0217	0.1106	0.0107	3.0477	0.085	0.1063	0.0226
	Equal_Opportunity	2.4507	0.0368	0.1098	0.0404	2.5667	0.1526	0.0994	0.0453	2.5558	0.0768	0.0889	0.0371	2.6434	0.1614	0.0798	0.045	2.4087	0.066	0.0903	0.0301	2.5833	0.1754	0.0828	0.0319	2.3367	0.0217	0.16	0.0289	2.6167	0.1265	0.1109	0.0479
	Equalized_Odds	2.4507	0.0368	0.1236	0.0273	2.895	0.2613	0.1062	0.0212	2.5558	0.0768	0.1022	0.0294	2.6806	0.2215	0.0991	0.0355	2.4087	0.066	0.111	0.0182	2.7983	0.3055	0.1005	0.0239	2.3367	0.0217	0.1602	0.0285	3.0393	0.1088	0.1095	0.0293
	Overall_Acc_Equality	2.4507	0.0368	0.0177	0.009	2.4507	0.0368	0.0177	0.009	2.5558	0.0768	0.0069	0.0047	2.5558	0.0768	0.0069	0.0047	2.4087	0.066	0.0149	0.0068	2.4087	0.066	0.0149	0.0068	2.3367	0.0217	0.031	0.0081	2.3367	0.0217	0.031	0.0081
	Predictive_Equality	2.4507	0.0368	0.0962	0.0177	2.8368	0.3023	0.1	0.012	2.5558	0.0768	0.0796	0.0232	2.559	0.0821	0.0801	0.0234	2.4087	0.066	0.1029	0.0158	2.6823	0.3665	0.0965	0.0202	2.3367	0.0217	0.1064	0.0117	3.0123	0.1727	0.1076	0.0265
	Predictive_Parity	2.4392	0.0191	0.0531	0.018	2.4474	0.0404	0.0525	0.0195	2.5558	0.0768	0.045	0.0158	3.0016	0.1711	0.0385	0.0132	2.4378	0.039	0.0522	0.0138	2.4457	0.0444	0.0517	0.0142	2.3367	0.0217	0.0578	0.0169	2.3491	0.0541	0.0575	0.0177
0.15	Demographic_Parity	2.4392	0.0191	0.1109	0.0118	2.4392	0.0191	0.1109	0.0118	2.5219	0.0524	0.0807	0.0191	2.5219	0.0524	0.0807	0.0191	2.4378	0.039	0.1112	0.0166	2.4378	0.039	0.1112	0.0166	2.3367	0.0217	0.1106	0.0107	2.3367	0.0217	0.1106	0.0107
	Equal_Opportunity	2.4392	0.0191	0.0973	0.031	2.4392	0.0191	0.0973	0.031	2.5219	0.0524	0.0695	0.0297	2.5219	0.0524	0.0695	0.0297	2.4378	0.039	0.106	0.0311	2.4887	0.074	0.1124	0.0326	2.3367	0.0217	0.16	0.0289	2.3801	0.0827	0.1608	0.028
	Equalized_Odds	2.4392	0.0191	0.1152	0.0192	2.4392	0.0191	0.1152	0.0192	2.5219	0.0524	0.086	0.0189	2.5219	0.0524	0.086	0.0189	2.4378	0.039	0.122	0.0208	2.4887	0.074	0.1293	0.0184	2.3367	0.0217	0.1602	0.0285	2.398	0.1069	0.1568	0.0317
	Overall_Acc_Equality	2.4392	0.0191	0.0149	0.0074	2.4392	0.0191	0.0149	0.0074	2.5219	0.0524	0.0096	0.0059	2.5219	0.0524	0.0096	0.0059	2.4378	0.039	0.0178	0.0075	2.4378	0.039	0.0178	0.0075	2.3367	0.0217	0.031	0.0081	2.3367	0.0217	0.031	0.0081
	Predictive_Equality	2.4392	0.0191	0.1065	0.0135	2.4392	0.0191	0.1065	0.0135	2.5219	0.0524	0.0793	0.0193	2.5219	0.0524	0.0793	0.0193	2.4378	0.039	0.1059	0.0173	2.4378	0.039	0.1059	0.0173	2.3367	0.0217	0.1064	0.0117	2.3627	0.0841	0.1067	0.0113
	Predictive_Parity	2.4469	0.0344	0.0516	0.0153	2.4469	0.0344	0.0516	0.0153	2.5219	0.0524	0.0398	0.0124	2.5476	0.1023	0.0386	0.0136	2.4283	0.0464	0.054	0.0138	2.4283	0.0464	0.054	0.0138	2.3367	0.0217	0.0578	0.0169	2.3367	0.0217	0.0578	0.0169
0.2	Demographic_Parity	2.4469	0.0344	0.1045	0.0173	2.4469	0.0344	0.1045	0.0173	2.5236	0.061	0.0788	0.0212	2.5236	0.061	0.0788	0.0212	2.4283	0.0464	0.1087	0.0153	2.4283	0.0464	0.1087	0.0153	2.3367	0.0217	0.1106	0.0107	2.3367	0.0217	0.1106	0.0107
	Equal_Opportunity	2.4469	0.0344	0.1028	0.0286	2.4469	0.0344	0.1028	0.0286	2.5236	0.061	0.0662	0.0422	2.5263	0.0614	0.0689	0.0409	2.4283	0.0464	0.0916	0.0336	2.4283	0.0464	0.0916	0.0336	2.3367	0.0217	0.16	0.0289	2.3367	0.0217	0.16	0.0289
	Equalized_Odds	2.4469	0.0344	0.1136	0.0211	2.4469	0.0344	0.1136	0.0211	2.5236	0.061	0.0899	0.0334	2.5263	0.0614	0.0902	0.0337	2.4283	0.0464	0.1166	0.0221	2.4283	0.0464	0.1166	0.0221	2.3367	0.0217	0.1602	0.0285	2.3367	0.0217	0.1602	0.0285
	Overall_Acc_Equality	2.4469	0.0344	0.0207	0.0073	2.4469	0.0344	0.0207	0.0073	2.5236	0.061	0.012	0.0071	2.5236	0.061	0.012	0.0071	2.4283	0.0464	0.017	0.0069	2.4283	0.0464	0.017	0.0069	2.3367	0.0217	0.031	0.0081	2.3367	0.0217	0.031	0.0081
	Predictive_Equality	2.4469	0.0344	0.0963	0.0194	2.4469	0.0344	0.0963	0.0194	2.5236	0.061	0.0774	0.0216	2.5236	0.061	0.0774	0.0216	2.4283	0.0464	0.1037	0.0207	2.4283	0.0464	0.1037	0.0207	2.3367	0.0217	0.1064	0.0117	2.3367	0.0217	0.1064	0.0117
	Predictive_Parity	2.4429	0.0248	0.0539	0.014	2.4429	0.0248	0.0539	0.014	2.5236	0.061	0.0378	0.0153	2.5308	0.0645	0.038	0.0151	2.4251	0.0683	0.0508	0.0198	2.4251	0.0683	0.0508	0.0198	2.3367	0.0217	0.0578	0.0169	2.3367	0.0217	0.0578	0.0169
0.8	Disparate_Impact	2.4294	0.0234	0.8069	0.0251	2.5691	0.2052	0.8229	0.0344	2.5455	0.0668	0.781	0.0401	2.6442	0.1557	0.7963	0.05	2.4156	0.0386	0.8115	0.0154	2.5857	0.2342	0.8294	0.0319	2.3367	0.0217	0.8119	0.0208	2.4972	0.1792	0.8164	0.0224
