# Supplementary material
Source: ML conference proceedings conference paper supplement (https://openreview.net/forum?id=xiQNfYl33p)
Supplement: supplementary_material [file Pokec_z_region_gender_False.xlsx]

## Sheet: Sheet1
		stats
	cp_method	aps								cfgnn								daps								tps
	type	base				ours				base				ours				base				ours				base				ours
	stat_type	eff_mean	eff_std	violation_mean	violation_std	eff_mean	eff_std	violation_mean	violation_std	eff_mean	eff_std	violation_mean	violation_std	eff_mean	eff_std	violation_mean	violation_std	eff_mean	eff_std	violation_mean	violation_std	eff_mean	eff_std	violation_mean	violation_std	eff_mean	eff_std	violation_mean	violation_std	eff_mean	eff_std	violation_mean	violation_std
c	fairness_metric
0.05	Demographic_Parity	2.4082	0.0438	0.1711	0.0203	3.6621	0.1439	0.0584	0.0227	2.5123	0.0827	0.1658	0.0191	3.7945	0.164	0.0612	0.045	2.4093	0.0686	0.1702	0.0153	3.6877	0.1284	0.0601	0.0215	2.2648	0.0663	0.1748	0.0198	3.6473	0.114	0.0745	0.0165
	Equal_Opportunity	2.4082	0.0438	0.1477	0.0173	3.4881	0.1685	0.044	0.02	2.5123	0.0827	0.1754	0.0437	3.9181	0.0792	0.0185	0.0232	2.4093	0.0686	0.1368	0.0281	3.8129	0.0945	0.0167	0.0075	2.2648	0.0663	0.122	0.046	3.3012	0.1219	0.0483	0.0265
	Equalized_Odds	2.4082	0.0438	0.1618	0.0176	3.7871	0.1332	0.055	0.0219	2.5123	0.0827	0.1803	0.0391	3.9519	0.0531	0.0282	0.0283	2.4093	0.0686	0.1594	0.0184	3.881	0.0721	0.0426	0.0195	2.2648	0.0663	0.1629	0.0264	3.8341	0.1264	0.0713	0.0294
	Overall_Acc_Equality	2.4082	0.0438	0.0279	0.0127	2.4349	0.0993	0.0279	0.0127	2.5123	0.0827	0.028	0.0126	2.5328	0.0749	0.0266	0.0124	2.4093	0.0686	0.0272	0.007	2.4275	0.0393	0.0267	0.0071	2.2648	0.0663	0.0249	0.0075	2.2648	0.0663	0.0249	0.0075
	Predictive_Equality	2.4082	0.0438	0.1537	0.0244	3.7871	0.1332	0.055	0.0219	2.5123	0.0827	0.1384	0.019	3.8206	0.1797	0.0699	0.0564	2.4093	0.0686	0.1505	0.0215	3.7507	0.2285	0.0636	0.0409	2.2648	0.0663	0.1515	0.0225	3.8341	0.1264	0.0713	0.0294
	Predictive_Parity	2.3932	0.0291	0.0862	0.0237	3.2331	0.1985	0.0472	0.0176	2.5123	0.0827	0.1152	0.0187	4	0	0.086	0	2.406	0.0671	0.0835	0.0203	3.2916	0.2564	0.0449	0.0217	2.2648	0.0663	0.1007	0.0225	3.2163	0.2877	0.0564	0.0252
0.1	Demographic_Parity	2.3932	0.0291	0.1685	0.0176	3.4014	0.0776	0.1063	0.0285	2.6315	0.076	0.1603	0.0148	3.5013	0.1328	0.1013	0.0327	2.406	0.0671	0.1733	0.0176	3.3403	0.1564	0.1087	0.0443	2.2648	0.0663	0.1748	0.0198	3.431	0.0508	0.0958	0.0184
	Equal_Opportunity	2.3932	0.0291	0.1883	0.0508	2.8706	0.1901	0.1011	0.0321	2.6315	0.076	0.1741	0.0666	3.3614	0.3361	0.0755	0.0523	2.406	0.0671	0.1175	0.0278	3.2425	0.1326	0.0628	0.0194	2.2648	0.0663	0.122	0.046	2.6503	0.1287	0.1155	0.0369
	Equalized_Odds	2.3932	0.0291	0.1923	0.0445	3.4038	0.0922	0.1104	0.0307	2.6315	0.076	0.1843	0.0564	3.6434	0.2113	0.097	0.0419	2.406	0.0671	0.1555	0.0277	3.4102	0.1838	0.1093	0.0464	2.2648	0.0663	0.1629	0.0264	3.4539	0.0537	0.0974	0.0211
	Overall_Acc_Equality	2.3932	0.0291	0.0245	0.0126	2.3932	0.0291	0.0245	0.0126	2.6315	0.076	0.0242	0.0058	2.6315	0.076	0.0242	0.0058	2.406	0.0671	0.0283	0.0123	2.406	0.0671	0.0283	0.0123	2.2648	0.0663	0.0249	0.0075	2.2648	0.0663	0.0249	0.0075
	Predictive_Equality	2.3932	0.0291	0.1487	0.0224	3.4006	0.0924	0.1105	0.0307	2.6315	0.076	0.133	0.0175	3.3968	0.2938	0.1136	0.0363	2.406	0.0671	0.1534	0.0272	3.3368	0.2393	0.1178	0.048	2.2648	0.0663	0.1515	0.0225	3.4539	0.0537	0.0974	0.0211
	Predictive_Parity	2.4032	0.0358	0.0838	0.0211	2.5285	0.2129	0.0786	0.0256	2.6315	0.076	0.1157	0.0267	3.8719	0.0173	0.0867	0.0019	2.4158	0.0644	0.0853	0.0241	2.7473	0.2737	0.0749	0.0313	2.2648	0.0663	0.1007	0.0225	2.4152	0.2715	0.097	0.0289
0.15	Demographic_Parity	2.4032	0.0358	0.171	0.0157	2.9975	0.329	0.1541	0.0368	2.697	0.0532	0.1571	0.0147	2.9394	0.2835	0.1488	0.021	2.4158	0.0644	0.1738	0.0183	2.8512	0.3549	0.1634	0.0368	2.2648	0.0663	0.1748	0.0198	2.7536	0.4704	0.1673	0.0378
	Equal_Opportunity	2.4032	0.0358	0.1202	0.016	2.5548	0.198	0.1093	0.0149	2.697	0.0532	0.1629	0.0422	2.9156	0.2325	0.1358	0.0505	2.4158	0.0644	0.1524	0.0274	2.7957	0.3386	0.1136	0.0499	2.2648	0.0663	0.122	0.046	2.3795	0.1969	0.1262	0.0465
	Equalized_Odds	2.4032	0.0358	0.1507	0.0185	2.8522	0.3809	0.1506	0.0279	2.697	0.0532	0.1678	0.0398	2.9716	0.2507	0.1524	0.0288	2.4158	0.0644	0.172	0.02	3.0114	0.3499	0.1516	0.04	2.2648	0.0663	0.1629	0.0264	2.6407	0.4731	0.1508	0.0279
	Overall_Acc_Equality	2.4032	0.0358	0.0286	0.0099	2.4032	0.0358	0.0286	0.0099	2.697	0.0532	0.0235	0.009	2.697	0.0532	0.0235	0.009	2.4158	0.0644	0.0271	0.008	2.4158	0.0644	0.0271	0.008	2.2648	0.0663	0.0249	0.0075	2.2648	0.0663	0.0249	0.0075
	Predictive_Equality	2.4032	0.0358	0.1502	0.0186	2.6624	0.3729	0.1518	0.0205	2.697	0.0532	0.1326	0.0171	2.7616	0.1386	0.1302	0.019	2.4158	0.0644	0.1567	0.0236	2.7251	0.3897	0.1596	0.031	2.2648	0.0663	0.1515	0.0225	2.4788	0.4252	0.1522	0.0264
	Predictive_Parity	2.4093	0.052	0.083	0.0206	2.4093	0.052	0.083	0.0206	2.697	0.0532	0.1254	0.0245	3.68	0.0429	0.0896	0.0086	2.4143	0.0679	0.086	0.0229	2.4953	0.1753	0.0805	0.0255	2.2648	0.0663	0.1007	0.0225	2.2648	0.0663	0.1007	0.0225
0.2	Demographic_Parity	2.4093	0.052	0.17	0.0154	2.4093	0.052	0.17	0.0154	2.7288	0.0483	0.1591	0.0182	2.7288	0.0483	0.1591	0.0182	2.4143	0.0679	0.1782	0.0202	2.4673	0.1775	0.1772	0.0239	2.2648	0.0663	0.1748	0.0198	2.2648	0.0663	0.1748	0.0198
	Equal_Opportunity	2.4093	0.052	0.138	0.035	2.4501	0.0867	0.1293	0.0303	2.7288	0.0483	0.1447	0.046	2.8401	0.1514	0.1281	0.0555	2.4143	0.0679	0.1285	0.026	2.7152	0.2265	0.0994	0.0338	2.2648	0.0663	0.122	0.046	2.2668	0.0683	0.122	0.046
	Equalized_Odds	2.4093	0.052	0.1602	0.0189	2.4501	0.0867	0.1575	0.0153	2.7288	0.0483	0.1591	0.0332	2.8401	0.1514	0.155	0.0354	2.4143	0.0679	0.1644	0.0244	2.7346	0.2391	0.177	0.0262	2.2648	0.0663	0.1629	0.0264	2.2668	0.0683	0.1629	0.0264
	Overall_Acc_Equality	2.4093	0.052	0.0219	0.0068	2.4093	0.052	0.0219	0.0068	2.7288	0.0483	0.0176	0.0094	2.7288	0.0483	0.0176	0.0094	2.4143	0.0679	0.0218	0.0047	2.4143	0.0679	0.0218	0.0047	2.2648	0.0663	0.0249	0.0075	2.2648	0.0663	0.0249	0.0075
	Predictive_Equality	2.4093	0.052	0.1475	0.0207	2.4093	0.052	0.1475	0.0207	2.7288	0.0483	0.1333	0.0185	2.7288	0.0483	0.1333	0.0185	2.4143	0.0679	0.1598	0.0295	2.4293	0.0688	0.1605	0.0283	2.2648	0.0663	0.1515	0.0225	2.2648	0.0663	0.1515	0.0225
	Predictive_Parity	2.4168	0.0524	0.0838	0.0208	2.4168	0.0524	0.0838	0.0208	2.7288	0.0483	0.1312	0.027	3.546	0.0605	0.0906	0.0061	2.3981	0.0637	0.0828	0.0202	2.3981	0.0637	0.0828	0.0202	2.2648	0.0663	0.1007	0.0225	2.2648	0.0663	0.1007	0.0225
0.8	Disparate_Impact	2.4082	0.0438	0.6583	0.0348	3.1733	0.0772	0.7868	0.0466	2.5123	0.0827	0.5897	0.0395	3.4707	0.0994	0.8063	0.0453	2.4093	0.0686	0.6579	0.0309	3.1332	0.1556	0.7682	0.0774	2.2648	0.0663	0.64	0.0384	3.175	0.106	0.7852	0.0519
