# Supplementary material
Source: ML conference proceedings conference paper supplement (https://openreview.net/forum?id=xiQNfYl33p)
Supplement: supplementary_material [file Pokec_z_region_gender_True.xlsx]

## Sheet: Sheet1
		stats
	cp_method	aps								cfgnn								daps								tps
	type	base				ours				base				ours				base				ours				base				ours
	stat_type	eff_mean	eff_std	violation_mean	violation_std	eff_mean	eff_std	violation_mean	violation_std	eff_mean	eff_std	violation_mean	violation_std	eff_mean	eff_std	violation_mean	violation_std	eff_mean	eff_std	violation_mean	violation_std	eff_mean	eff_std	violation_mean	violation_std	eff_mean	eff_std	violation_mean	violation_std	eff_mean	eff_std	violation_mean	violation_std
c	fairness_metric
0.05	Demographic_Parity	2.4082	0.0438	0.1711	0.0203	3.3124	0.1157	0.0836	0.0183	2.5123	0.0827	0.1658	0.0191	3.372	0.3068	0.0897	0.0305	2.4093	0.0686	0.1702	0.0153	3.375	0.1773	0.094	0.0417	2.2648	0.0663	0.1748	0.0198	3.2367	0.1582	0.0817	0.0113
	Equal_Opportunity	2.4082	0.0438	0.1477	0.0173	3.0969	0.1106	0.0812	0.0274	2.5123	0.0827	0.1754	0.0437	3.6489	0.2182	0.0561	0.0343	2.4093	0.0686	0.1368	0.0281	3.3182	0.209	0.0504	0.0256	2.2648	0.0663	0.122	0.046	2.8486	0.103	0.0992	0.0275
	Equalized_Odds	2.4082	0.0438	0.1618	0.0176	3.5656	0.1292	0.0789	0.0271	2.5123	0.0827	0.1803	0.0391	3.8462	0.0869	0.0494	0.024	2.4093	0.0686	0.1594	0.0184	3.6519	0.1701	0.0569	0.0265	2.2648	0.0663	0.1629	0.0264	3.5184	0.1224	0.0954	0.0226
	Overall_Acc_Equality	2.4082	0.0438	0.0279	0.0127	2.4098	0.0447	0.0281	0.0128	2.5123	0.0827	0.028	0.0126	2.5134	0.081	0.028	0.0126	2.4093	0.0686	0.0272	0.007	2.4107	0.0652	0.0269	0.0065	2.2648	0.0663	0.0249	0.0075	2.2648	0.0663	0.0249	0.0075
	Predictive_Equality	2.4082	0.0438	0.1537	0.0244	3.4096	0.1506	0.0852	0.0216	2.5123	0.0827	0.1384	0.019	3.4333	0.2237	0.105	0.0482	2.4093	0.0686	0.1505	0.0215	3.364	0.2292	0.0912	0.0429	2.2648	0.0663	0.1515	0.0225	3.3407	0.1881	0.0895	0.0185
	Predictive_Parity	2.3932	0.0291	0.0862	0.0237	2.5588	0.0942	0.057	0.017	2.5123	0.0827	0.1152	0.0187	3.918	0.0339	0.086	0	2.406	0.0671	0.0835	0.0203	2.6595	0.1386	0.0503	0.0236	2.2648	0.0663	0.1007	0.0225	2.4585	0.1165	0.0595	0.0221
0.1	Demographic_Parity	2.3932	0.0291	0.1685	0.0176	2.914	0.2101	0.1323	0.0318	2.6315	0.076	0.1603	0.0148	2.8884	0.094	0.1146	0.0127	2.406	0.0671	0.1733	0.0176	2.9485	0.1712	0.135	0.0391	2.2648	0.0663	0.1748	0.0198	2.7438	0.2863	0.1243	0.0264
	Equal_Opportunity	2.3932	0.0291	0.1883	0.0508	2.6605	0.139	0.15	0.0548	2.6315	0.076	0.1741	0.0666	3.0344	0.2464	0.139	0.058	2.406	0.0671	0.1175	0.0278	2.8622	0.1719	0.0989	0.024	2.2648	0.0663	0.122	0.046	2.4745	0.1116	0.1288	0.0399
	Equalized_Odds	2.3932	0.0291	0.1923	0.0445	3.0604	0.1976	0.1387	0.0486	2.6315	0.076	0.1843	0.0564	3.2307	0.2373	0.1474	0.0528	2.406	0.0671	0.1555	0.0277	3.0822	0.1642	0.1408	0.0383	2.2648	0.0663	0.1629	0.0264	2.8696	0.2907	0.1462	0.0368
	Overall_Acc_Equality	2.3932	0.0291	0.0245	0.0126	2.3932	0.0291	0.0245	0.0126	2.6315	0.076	0.0242	0.0058	2.6315	0.076	0.0242	0.0058	2.406	0.0671	0.0283	0.0123	2.406	0.0671	0.0283	0.0123	2.2648	0.0663	0.0249	0.0075	2.2648	0.0663	0.0249	0.0075
	Predictive_Equality	2.3932	0.0291	0.1487	0.0224	2.8099	0.2554	0.1392	0.0267	2.6315	0.076	0.133	0.0175	2.8572	0.1486	0.1263	0.0204	2.406	0.0671	0.1534	0.0272	2.8378	0.2613	0.1351	0.0394	2.2648	0.0663	0.1515	0.0225	2.6428	0.3366	0.1314	0.0339
	Predictive_Parity	2.4032	0.0358	0.0838	0.0211	2.4156	0.0512	0.081	0.0238	2.6315	0.076	0.1157	0.0267	3.5557	0.0597	0.0866	0.0028	2.4158	0.0644	0.0853	0.0241	2.4506	0.0739	0.0774	0.0284	2.2648	0.0663	0.1007	0.0225	2.2805	0.0789	0.0989	0.0245
0.15	Demographic_Parity	2.4032	0.0358	0.171	0.0157	2.6062	0.2346	0.1632	0.0242	2.697	0.0532	0.1571	0.0147	2.7285	0.0715	0.1486	0.0215	2.4158	0.0644	0.1738	0.0183	2.5603	0.2114	0.171	0.0303	2.2648	0.0663	0.1748	0.0198	2.3814	0.2253	0.1639	0.0325
	Equal_Opportunity	2.4032	0.0358	0.1202	0.016	2.4762	0.1081	0.1159	0.018	2.697	0.0532	0.1629	0.0422	2.7891	0.108	0.1498	0.0419	2.4158	0.0644	0.1524	0.0274	2.6529	0.2362	0.1344	0.0398	2.2648	0.0663	0.122	0.046	2.3203	0.1225	0.1243	0.0459
	Equalized_Odds	2.4032	0.0358	0.1507	0.0185	2.6027	0.2256	0.152	0.0226	2.697	0.0532	0.1678	0.0398	2.7935	0.1073	0.1597	0.0271	2.4158	0.0644	0.172	0.02	2.7937	0.2432	0.1635	0.0284	2.2648	0.0663	0.1629	0.0264	2.3656	0.2088	0.1629	0.0264
	Overall_Acc_Equality	2.4032	0.0358	0.0286	0.0099	2.4032	0.0358	0.0286	0.0099	2.697	0.0532	0.0235	0.009	2.697	0.0532	0.0235	0.009	2.4158	0.0644	0.0271	0.008	2.4158	0.0644	0.0271	0.008	2.2648	0.0663	0.0249	0.0075	2.2648	0.0663	0.0249	0.0075
	Predictive_Equality	2.4032	0.0358	0.1502	0.0186	2.508	0.1936	0.1509	0.0226	2.697	0.0532	0.1326	0.0171	2.7015	0.0542	0.131	0.0181	2.4158	0.0644	0.1567	0.0236	2.5425	0.19	0.1595	0.0251	2.2648	0.0663	0.1515	0.0225	2.2776	0.0787	0.1487	0.0289
	Predictive_Parity	2.4093	0.052	0.083	0.0206	2.4093	0.052	0.083	0.0206	2.697	0.0532	0.1254	0.0245	3.0823	0.0529	0.098	0.0121	2.4143	0.0679	0.086	0.0229	2.4218	0.0642	0.0805	0.0255	2.2648	0.0663	0.1007	0.0225	2.2648	0.0663	0.1007	0.0225
0.2	Demographic_Parity	2.4093	0.052	0.17	0.0154	2.4093	0.052	0.17	0.0154	2.7288	0.0483	0.1591	0.0182	2.7288	0.0483	0.1591	0.0182	2.4143	0.0679	0.1782	0.0202	2.4379	0.1102	0.1782	0.0202	2.2648	0.0663	0.1748	0.0198	2.2648	0.0663	0.1748	0.0198
	Equal_Opportunity	2.4093	0.052	0.138	0.035	2.4264	0.0493	0.138	0.035	2.7288	0.0483	0.1447	0.046	2.7823	0.0692	0.1324	0.0527	2.4143	0.0679	0.1285	0.026	2.5336	0.1309	0.1182	0.0307	2.2648	0.0663	0.122	0.046	2.2655	0.067	0.122	0.046
	Equalized_Odds	2.4093	0.052	0.1602	0.0189	2.4264	0.0493	0.1603	0.0188	2.7288	0.0483	0.1591	0.0332	2.7822	0.069	0.1543	0.036	2.4143	0.0679	0.1644	0.0244	2.5435	0.135	0.1721	0.0251	2.2648	0.0663	0.1629	0.0264	2.2655	0.067	0.1629	0.0264
	Overall_Acc_Equality	2.4093	0.052	0.0219	0.0068	2.4093	0.052	0.0219	0.0068	2.7288	0.0483	0.0176	0.0094	2.7288	0.0483	0.0176	0.0094	2.4143	0.0679	0.0218	0.0047	2.4143	0.0679	0.0218	0.0047	2.2648	0.0663	0.0249	0.0075	2.2648	0.0663	0.0249	0.0075
	Predictive_Equality	2.4093	0.052	0.1475	0.0207	2.4093	0.052	0.1475	0.0207	2.7288	0.0483	0.1333	0.0185	2.7288	0.0483	0.1333	0.0185	2.4143	0.0679	0.1598	0.0295	2.4212	0.0662	0.1598	0.0295	2.2648	0.0663	0.1515	0.0225	2.2648	0.0663	0.1515	0.0225
	Predictive_Parity	2.4168	0.0524	0.0838	0.0208	2.4168	0.0524	0.0838	0.0208	2.7288	0.0483	0.1312	0.027	2.9921	0.0822	0.0981	0.0066	2.3981	0.0637	0.0828	0.0202	2.3981	0.0637	0.0828	0.0202	2.2648	0.0663	0.1007	0.0225	2.2648	0.0663	0.1007	0.0225
0.8	Disparate_Impact	2.4082	0.0438	0.6583	0.0348	2.7993	0.1037	0.7729	0.0466	2.5123	0.0827	0.5897	0.0395	2.7876	0.1404	0.8005	0.0367	2.4093	0.0686	0.6579	0.0309	2.7427	0.1714	0.7492	0.0734	2.2648	0.0663	0.64	0.0384	2.6267	0.1838	0.7449	0.061
