# Supplementary material
Source: ML conference proceedings conference paper supplement (https://openreview.net/forum?id=xiQNfYl33p)
Supplement: supplementary_material [file Pokec_z_region_True.xlsx]

## Sheet: Sheet1
		stats
	cp_method	aps								cfgnn								daps								tps
	type	base				ours				base				ours				base				ours				base				ours
	stat_type	eff_mean	eff_std	violation_mean	violation_std	eff_mean	eff_std	violation_mean	violation_std	eff_mean	eff_std	violation_mean	violation_std	eff_mean	eff_std	violation_mean	violation_std	eff_mean	eff_std	violation_mean	violation_std	eff_mean	eff_std	violation_mean	violation_std	eff_mean	eff_std	violation_mean	violation_std	eff_mean	eff_std	violation_mean	violation_std
c	fairness_metric
0.05	Demographic_Parity	2.4294	0.0234	0.1095	0.0189	2.9414	0.061	0.0657	0.0121	2.5455	0.0668	0.0964	0.0128	2.9361	0.1875	0.061	0.0276	2.4156	0.0386	0.1061	0.0143	2.8898	0.1079	0.0699	0.0189	2.3367	0.0217	0.1106	0.0107	2.9779	0.0641	0.0694	0.0145
	Equal_Opportunity	2.4294	0.0234	0.1154	0.0464	2.5862	0.1016	0.096	0.0451	2.5455	0.0668	0.0881	0.0155	2.7554	0.2423	0.0855	0.032	2.4156	0.0386	0.0945	0.0312	2.7071	0.2165	0.0678	0.0294	2.3367	0.0217	0.16	0.0289	2.6103	0.1385	0.0876	0.0379
	Equalized_Odds	2.4294	0.0234	0.1301	0.0382	2.9651	0.0736	0.0909	0.0432	2.5455	0.0668	0.0988	0.0138	2.9888	0.2086	0.0708	0.0284	2.4156	0.0386	0.1111	0.0217	3.0442	0.0944	0.0777	0.0237	2.3367	0.0217	0.1602	0.0285	3.01	0.0679	0.0815	0.0272
	Overall_Acc_Equality	2.4294	0.0234	0.0234	0.0094	2.4294	0.0234	0.0234	0.0094	2.5455	0.0668	0.0075	0.0052	2.5455	0.0668	0.0075	0.0052	2.4156	0.0386	0.0163	0.0123	2.4156	0.0386	0.0163	0.0123	2.3367	0.0217	0.031	0.0081	2.3367	0.0217	0.031	0.0081
	Predictive_Equality	2.4294	0.0234	0.1046	0.0193	2.9036	0.0676	0.0614	0.012	2.5455	0.0668	0.091	0.0178	2.8635	0.1867	0.0733	0.0328	2.4156	0.0386	0.1001	0.0158	2.854	0.1028	0.0736	0.0203	2.3367	0.0217	0.1064	0.0117	2.9093	0.0786	0.0687	0.0143
	Predictive_Parity	2.4507	0.0368	0.0534	0.018	2.4834	0.0414	0.0438	0.0215	2.5455	0.0668	0.041	0.0093	3.5031	0.0682	0.0403	0.0057	2.4087	0.066	0.0528	0.0168	2.4448	0.0719	0.0426	0.0252	2.3367	0.0217	0.0578	0.0169	2.3678	0.0408	0.0491	0.0195
0.1	Demographic_Parity	2.4507	0.0368	0.1031	0.0191	2.6872	0.0976	0.0978	0.0182	2.5558	0.0768	0.0881	0.0184	2.5671	0.097	0.0882	0.0187	2.4087	0.066	0.1084	0.0127	2.5325	0.1789	0.1006	0.0183	2.3367	0.0217	0.1106	0.0107	2.6715	0.0491	0.1131	0.0138
	Equal_Opportunity	2.4507	0.0368	0.1098	0.0404	2.5038	0.0768	0.1091	0.0408	2.5558	0.0768	0.0889	0.0371	2.6063	0.1163	0.0889	0.0396	2.4087	0.066	0.0903	0.0301	2.4898	0.0715	0.091	0.0317	2.3367	0.0217	0.16	0.0289	2.4629	0.0634	0.1111	0.048
	Equalized_Odds	2.4507	0.0368	0.1236	0.0273	2.651	0.1496	0.1183	0.0284	2.5558	0.0768	0.1022	0.0294	2.6303	0.1528	0.0996	0.0348	2.4087	0.066	0.111	0.0182	2.6021	0.1612	0.1044	0.0233	2.3367	0.0217	0.1602	0.0285	2.7659	0.0515	0.1344	0.0367
	Overall_Acc_Equality	2.4507	0.0368	0.0177	0.009	2.4507	0.0368	0.0177	0.009	2.5558	0.0768	0.0069	0.0047	2.5558	0.0768	0.0069	0.0047	2.4087	0.066	0.0149	0.0068	2.4087	0.066	0.0149	0.0068	2.3367	0.0217	0.031	0.0081	2.3367	0.0217	0.031	0.0081
	Predictive_Equality	2.4507	0.0368	0.0962	0.0177	2.6302	0.1522	0.1	0.012	2.5558	0.0768	0.0796	0.0232	2.5578	0.08	0.0801	0.0234	2.4087	0.066	0.1029	0.0158	2.5366	0.1841	0.0965	0.0202	2.3367	0.0217	0.1064	0.0117	2.6372	0.0818	0.1126	0.019
	Predictive_Parity	2.4392	0.0191	0.0531	0.018	2.4398	0.0203	0.0525	0.0195	2.5558	0.0768	0.045	0.0158	2.7205	0.0937	0.0401	0.0122	2.4378	0.039	0.0522	0.0138	2.4381	0.0389	0.0517	0.0142	2.3367	0.0217	0.0578	0.0169	2.3375	0.0232	0.0578	0.0169
0.15	Demographic_Parity	2.4392	0.0191	0.1109	0.0118	2.4392	0.0191	0.1109	0.0118	2.5219	0.0524	0.0807	0.0191	2.5219	0.0524	0.0807	0.0191	2.4378	0.039	0.1112	0.0166	2.4378	0.039	0.1112	0.0166	2.3367	0.0217	0.1106	0.0107	2.3367	0.0217	0.1106	0.0107
	Equal_Opportunity	2.4392	0.0191	0.0973	0.031	2.4392	0.0191	0.0973	0.031	2.5219	0.0524	0.0695	0.0297	2.5219	0.0524	0.0695	0.0297	2.4378	0.039	0.106	0.0311	2.4624	0.0281	0.1066	0.0314	2.3367	0.0217	0.16	0.0289	2.3585	0.0482	0.1608	0.028
	Equalized_Odds	2.4392	0.0191	0.1152	0.0192	2.4392	0.0191	0.1152	0.0192	2.5219	0.0524	0.086	0.0189	2.5219	0.0524	0.086	0.0189	2.4378	0.039	0.122	0.0208	2.4624	0.0281	0.122	0.0208	2.3367	0.0217	0.1602	0.0285	2.3684	0.0595	0.1615	0.0266
	Overall_Acc_Equality	2.4392	0.0191	0.0149	0.0074	2.4392	0.0191	0.0149	0.0074	2.5219	0.0524	0.0096	0.0059	2.5219	0.0524	0.0096	0.0059	2.4378	0.039	0.0178	0.0075	2.4378	0.039	0.0178	0.0075	2.3367	0.0217	0.031	0.0081	2.3367	0.0217	0.031	0.0081
	Predictive_Equality	2.4392	0.0191	0.1065	0.0135	2.4392	0.0191	0.1065	0.0135	2.5219	0.0524	0.0793	0.0193	2.5219	0.0524	0.0793	0.0193	2.4378	0.039	0.1059	0.0173	2.4378	0.039	0.1059	0.0173	2.3367	0.0217	0.1064	0.0117	2.3465	0.0371	0.1067	0.0113
	Predictive_Parity	2.4469	0.0344	0.0516	0.0153	2.4469	0.0344	0.0516	0.0153	2.5219	0.0524	0.0398	0.0124	2.5228	0.0535	0.04	0.0129	2.4283	0.0464	0.054	0.0138	2.4283	0.0464	0.054	0.0138	2.3367	0.0217	0.0578	0.0169	2.3367	0.0217	0.0578	0.0169
0.2	Demographic_Parity	2.4469	0.0344	0.1045	0.0173	2.4469	0.0344	0.1045	0.0173	2.5236	0.061	0.0788	0.0212	2.5236	0.061	0.0788	0.0212	2.4283	0.0464	0.1087	0.0153	2.4283	0.0464	0.1087	0.0153	2.3367	0.0217	0.1106	0.0107	2.3367	0.0217	0.1106	0.0107
	Equal_Opportunity	2.4469	0.0344	0.1028	0.0286	2.4469	0.0344	0.1028	0.0286	2.5236	0.061	0.0662	0.0422	2.5248	0.061	0.0689	0.0409	2.4283	0.0464	0.0916	0.0336	2.4283	0.0464	0.0916	0.0336	2.3367	0.0217	0.16	0.0289	2.3367	0.0217	0.16	0.0289
	Equalized_Odds	2.4469	0.0344	0.1136	0.0211	2.4469	0.0344	0.1136	0.0211	2.5236	0.061	0.0899	0.0334	2.5248	0.061	0.0902	0.0337	2.4283	0.0464	0.1166	0.0221	2.4283	0.0464	0.1166	0.0221	2.3367	0.0217	0.1602	0.0285	2.3367	0.0217	0.1602	0.0285
	Overall_Acc_Equality	2.4469	0.0344	0.0207	0.0073	2.4469	0.0344	0.0207	0.0073	2.5236	0.061	0.012	0.0071	2.5236	0.061	0.012	0.0071	2.4283	0.0464	0.017	0.0069	2.4283	0.0464	0.017	0.0069	2.3367	0.0217	0.031	0.0081	2.3367	0.0217	0.031	0.0081
	Predictive_Equality	2.4469	0.0344	0.0963	0.0194	2.4469	0.0344	0.0963	0.0194	2.5236	0.061	0.0774	0.0216	2.5236	0.061	0.0774	0.0216	2.4283	0.0464	0.1037	0.0207	2.4283	0.0464	0.1037	0.0207	2.3367	0.0217	0.1064	0.0117	2.3367	0.0217	0.1064	0.0117
	Predictive_Parity	2.4429	0.0248	0.0539	0.014	2.4429	0.0248	0.0539	0.014	2.5236	0.061	0.0378	0.0153	2.527	0.0616	0.038	0.0151	2.4251	0.0683	0.0508	0.0198	2.4251	0.0683	0.0508	0.0198	2.3367	0.0217	0.0578	0.0169	2.3367	0.0217	0.0578	0.0169
0.8	Disparate_Impact	2.4294	0.0234	0.8069	0.0251	2.4749	0.0734	0.8148	0.023	2.5455	0.0668	0.781	0.0401	2.6027	0.1148	0.7964	0.0501	2.4156	0.0386	0.8115	0.0154	2.4526	0.0758	0.8128	0.0155	2.3367	0.0217	0.8119	0.0208	2.3909	0.0575	0.8164	0.0224
