# Supplementary material
Source: ML conference proceedings conference paper supplement (https://openreview.net/forum?id=xiQNfYl33p)

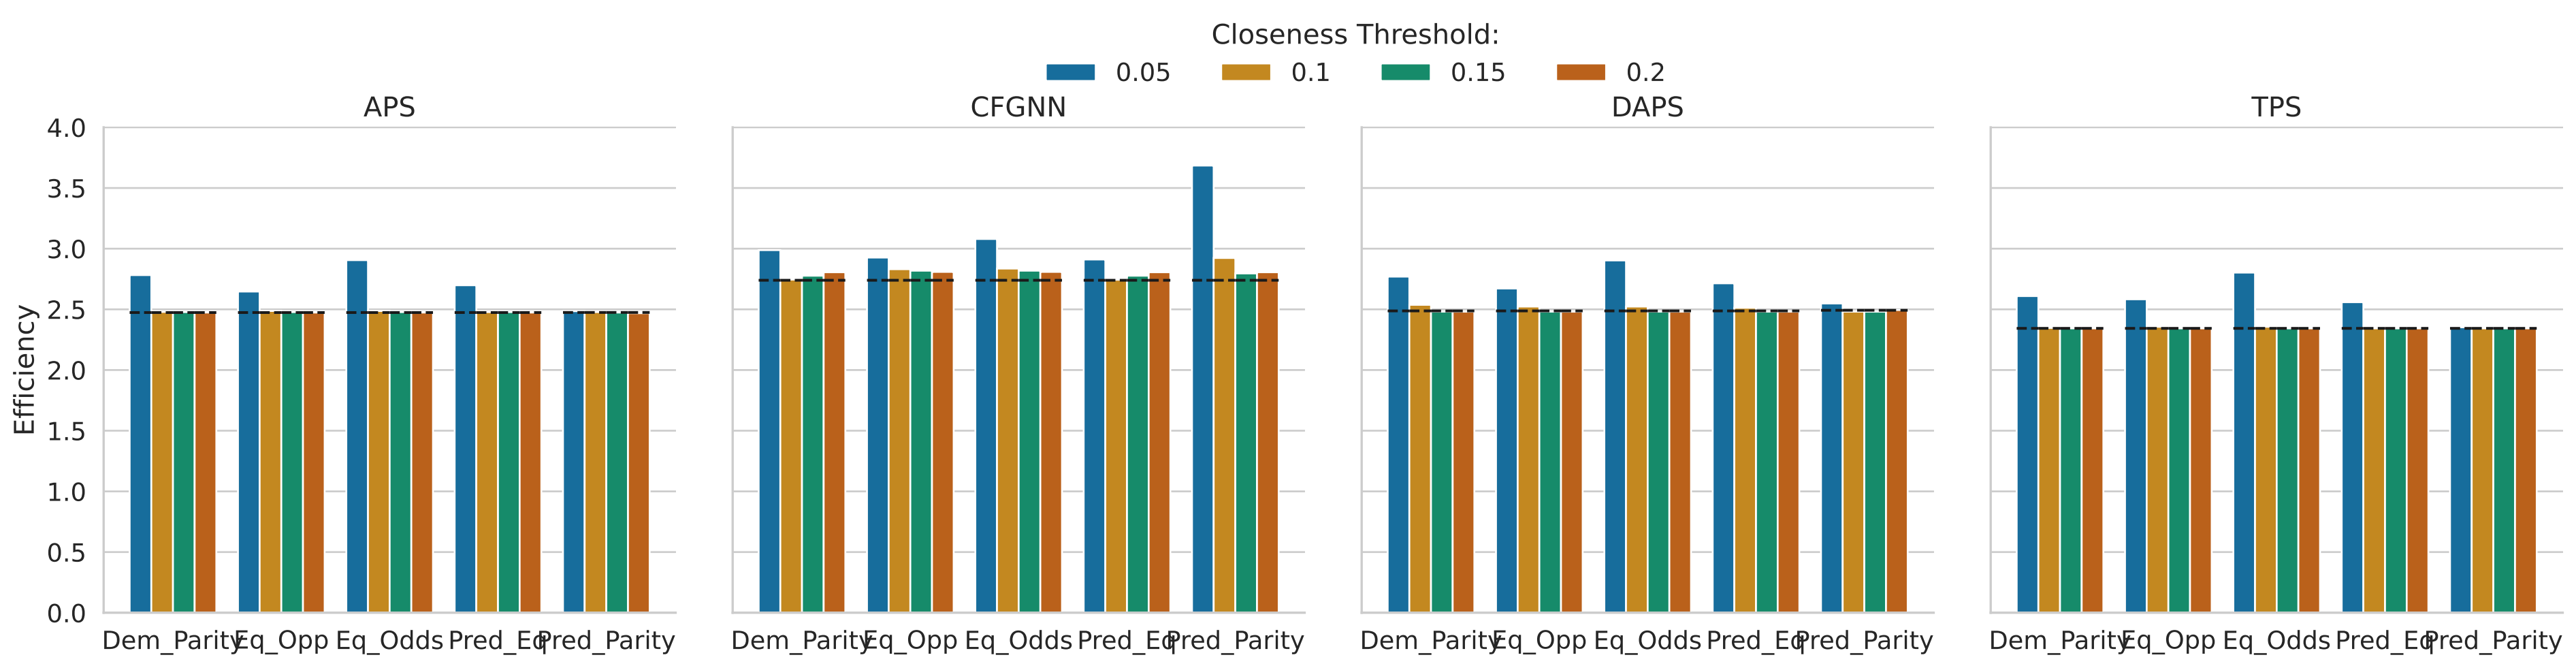

Supplement: supplementary_material [file attachment]

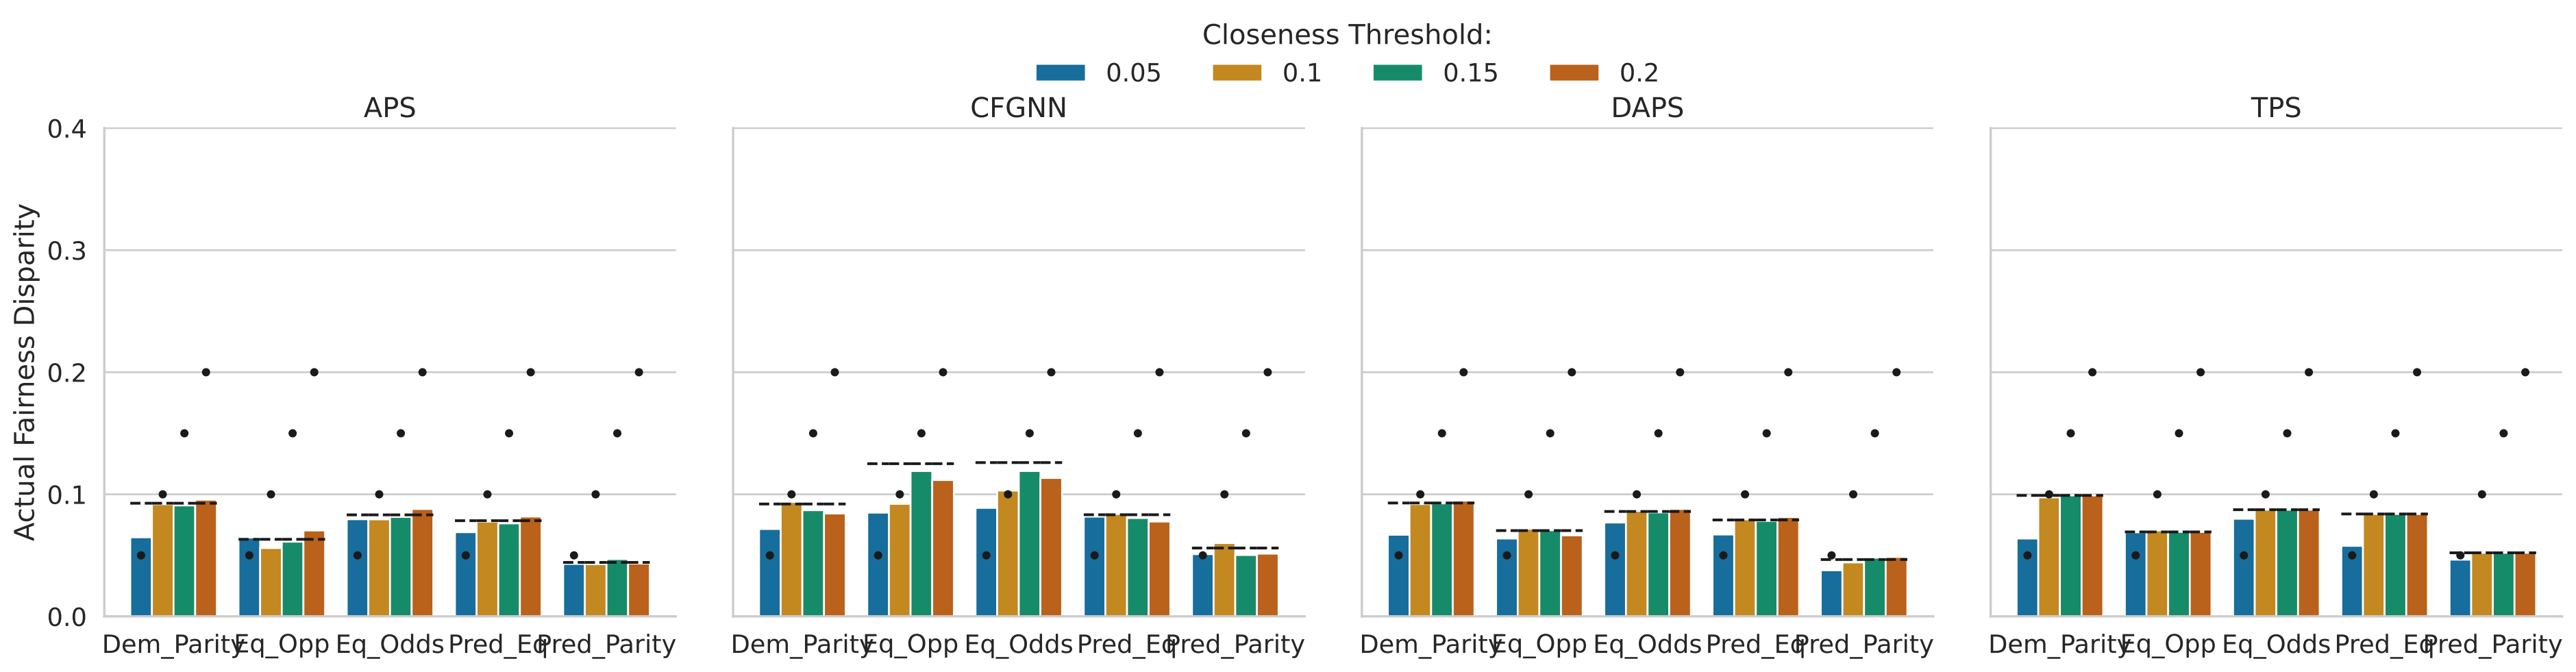

Supplement: supplementary_material [file attachment]

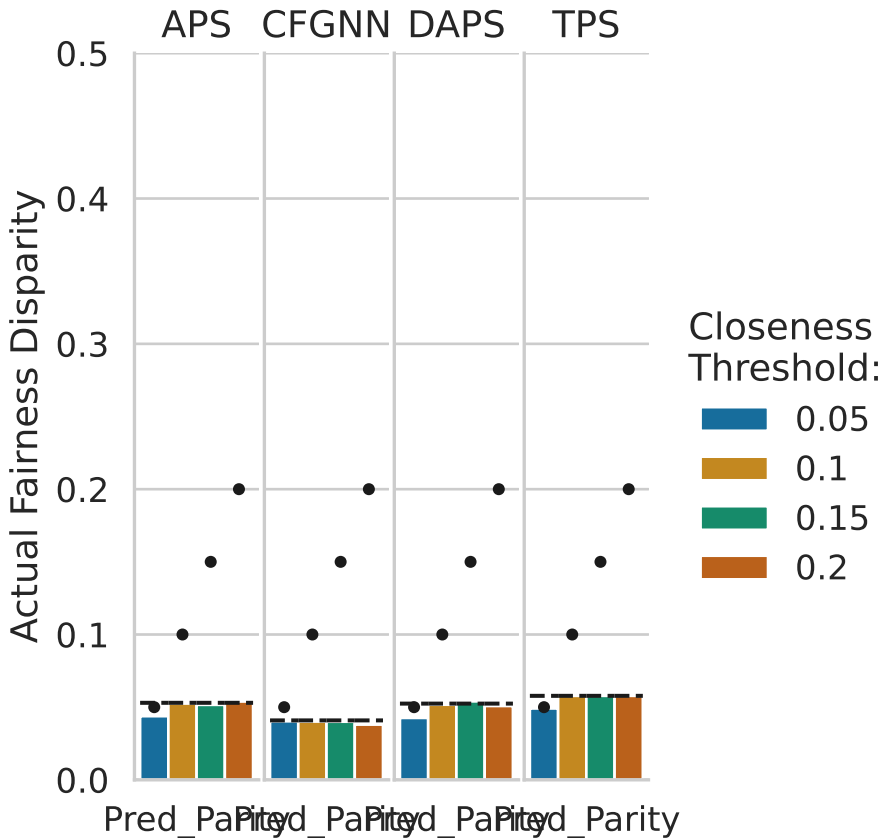

Supplement: supplementary_material [file attachment]

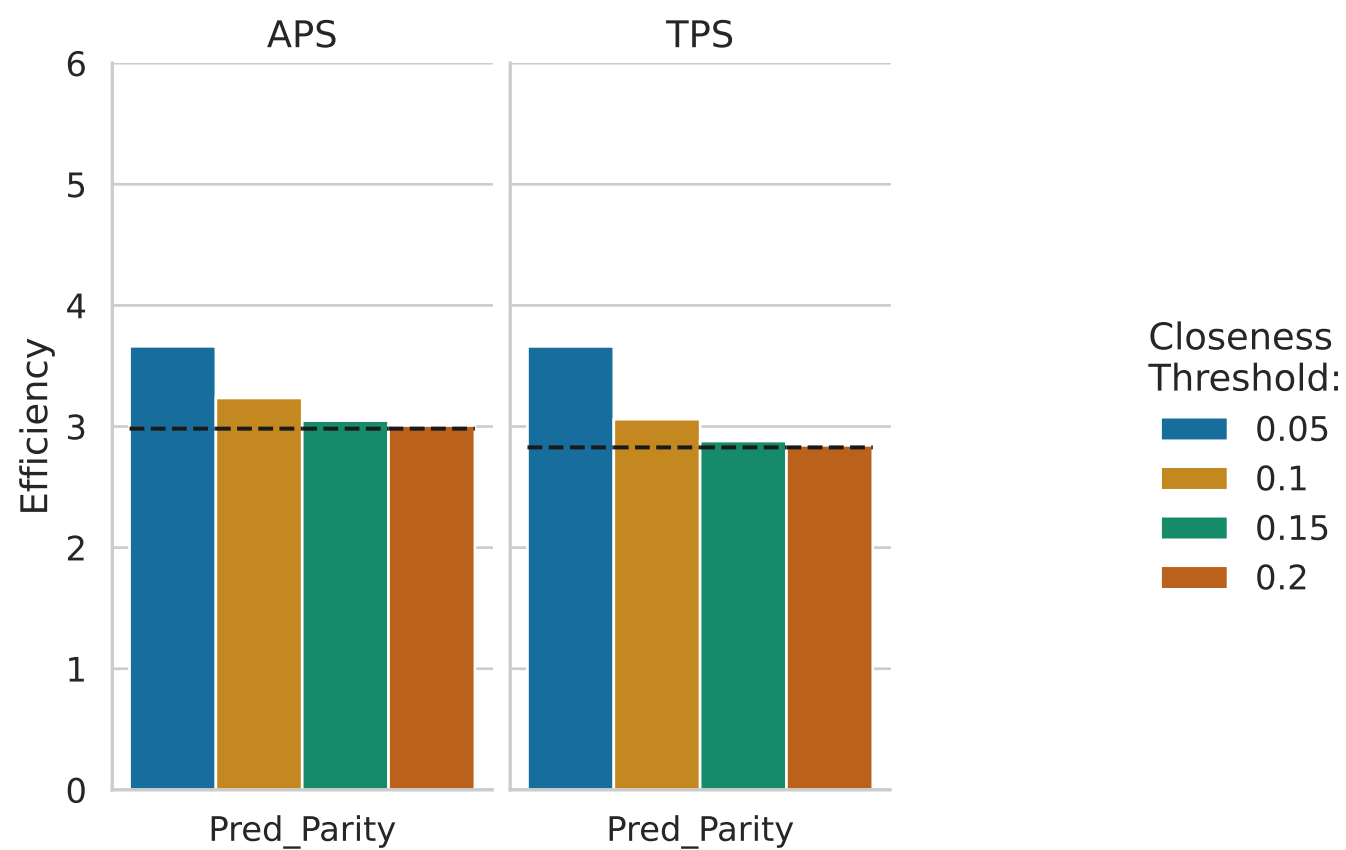

Supplement: supplementary_material [file attachment]

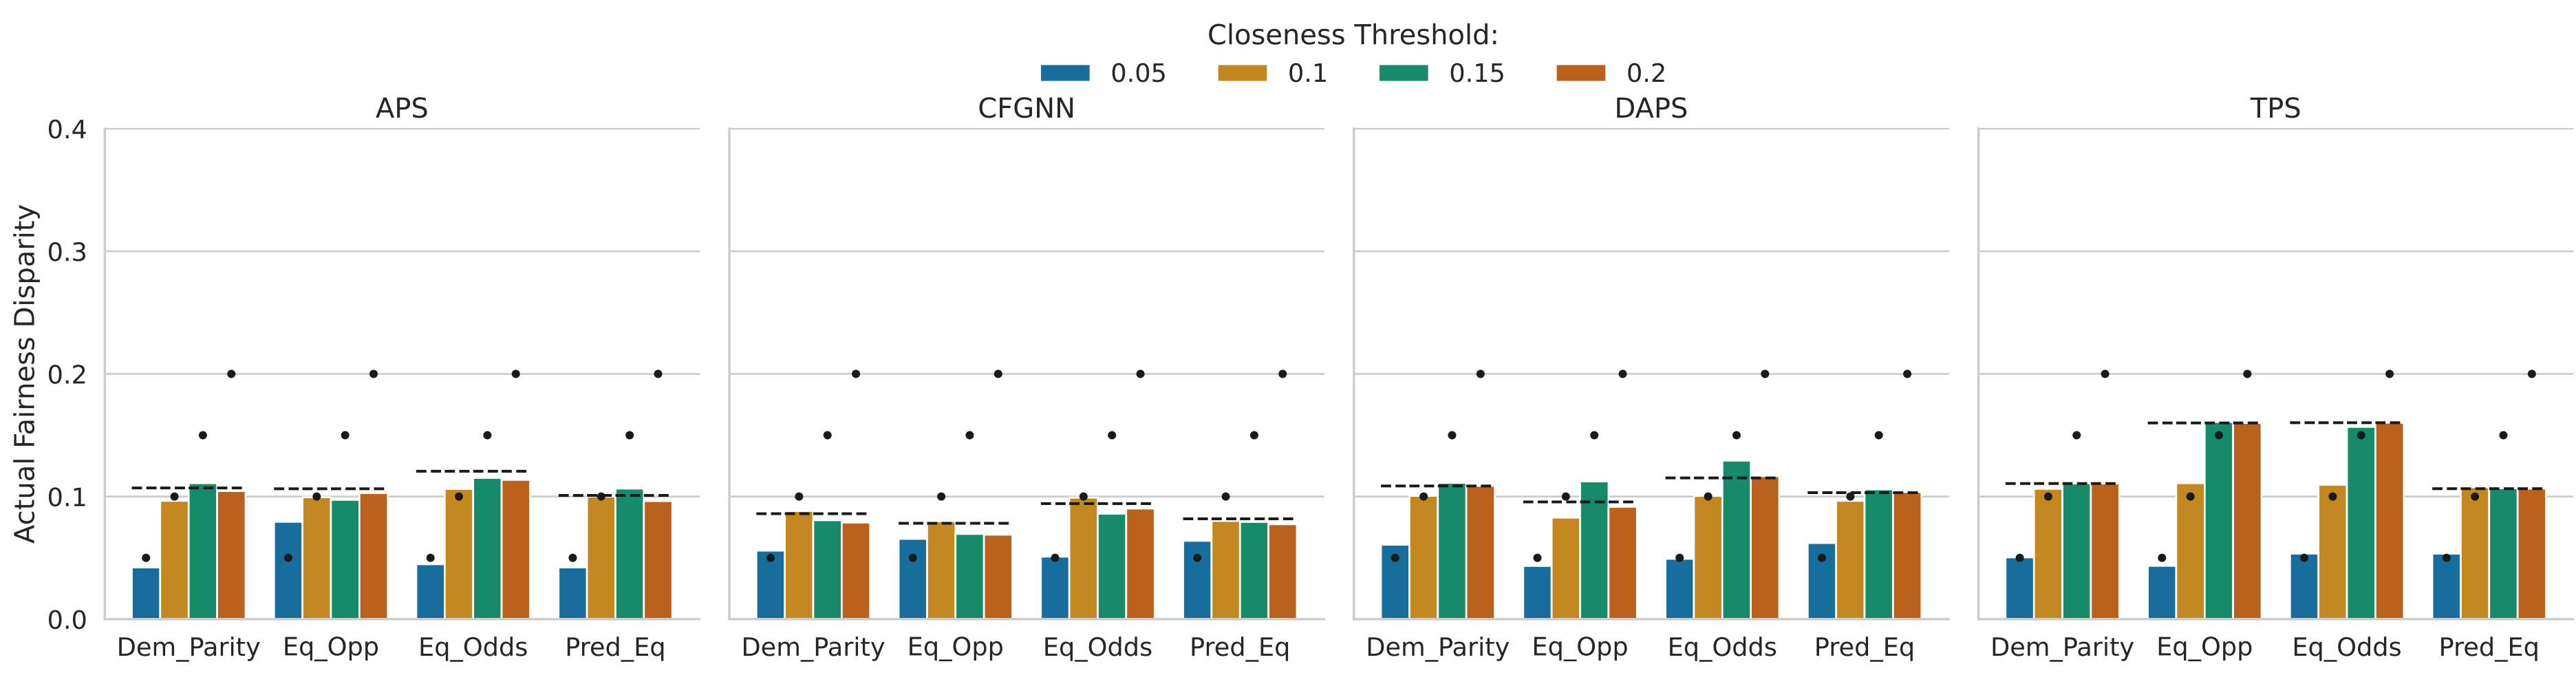

Supplement: supplementary_material [file attachment]

Closeness Threshold:

0.05

0.1

0.15

0.2

APS

CFGNN

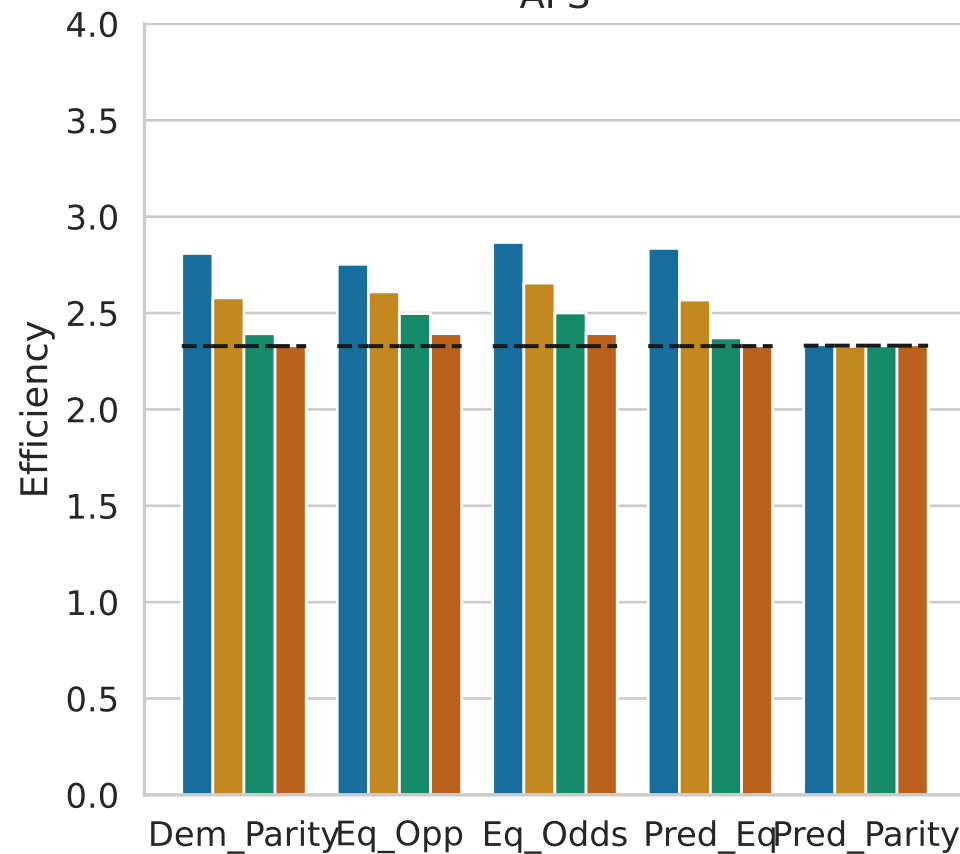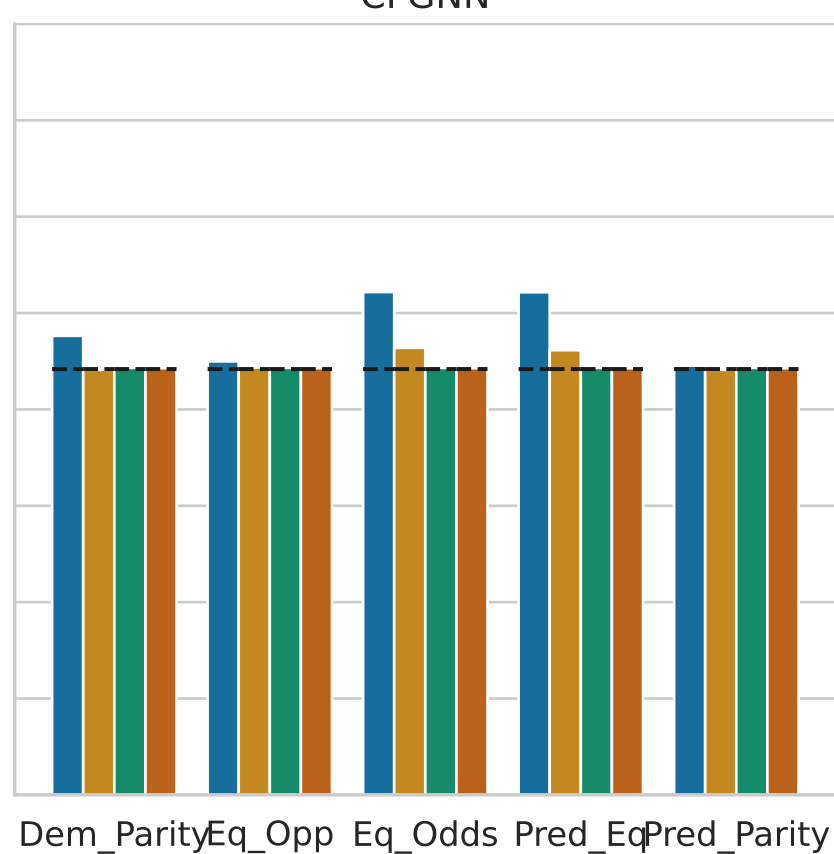

DAPS

TPS

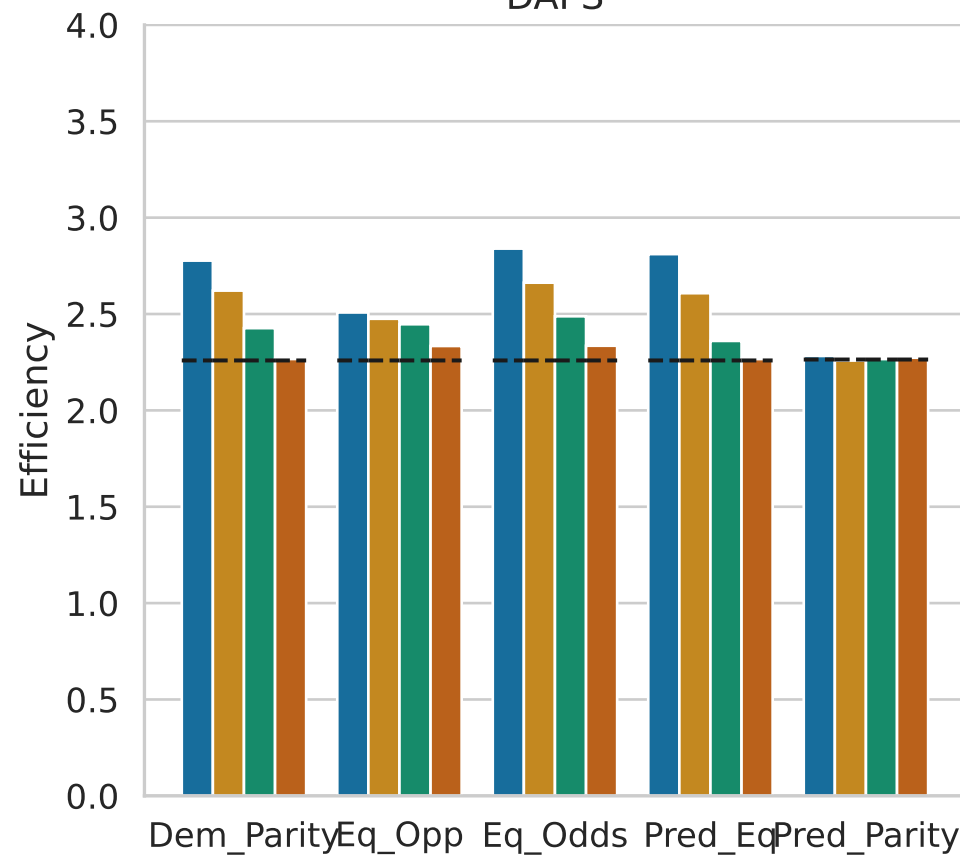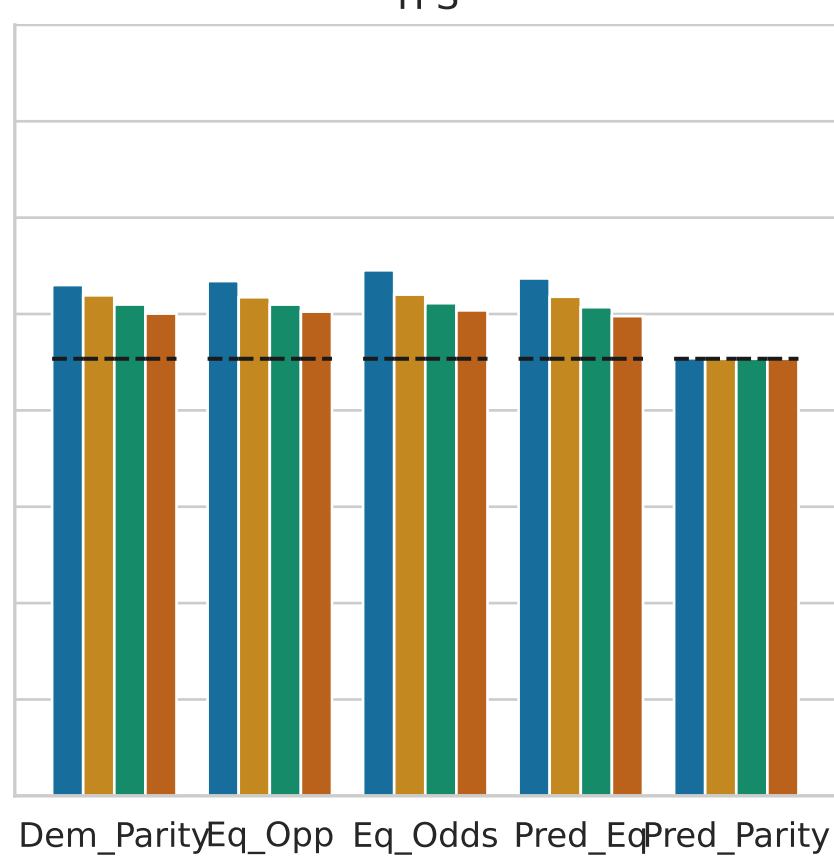

Supplement: supplementary_material [file attachment]

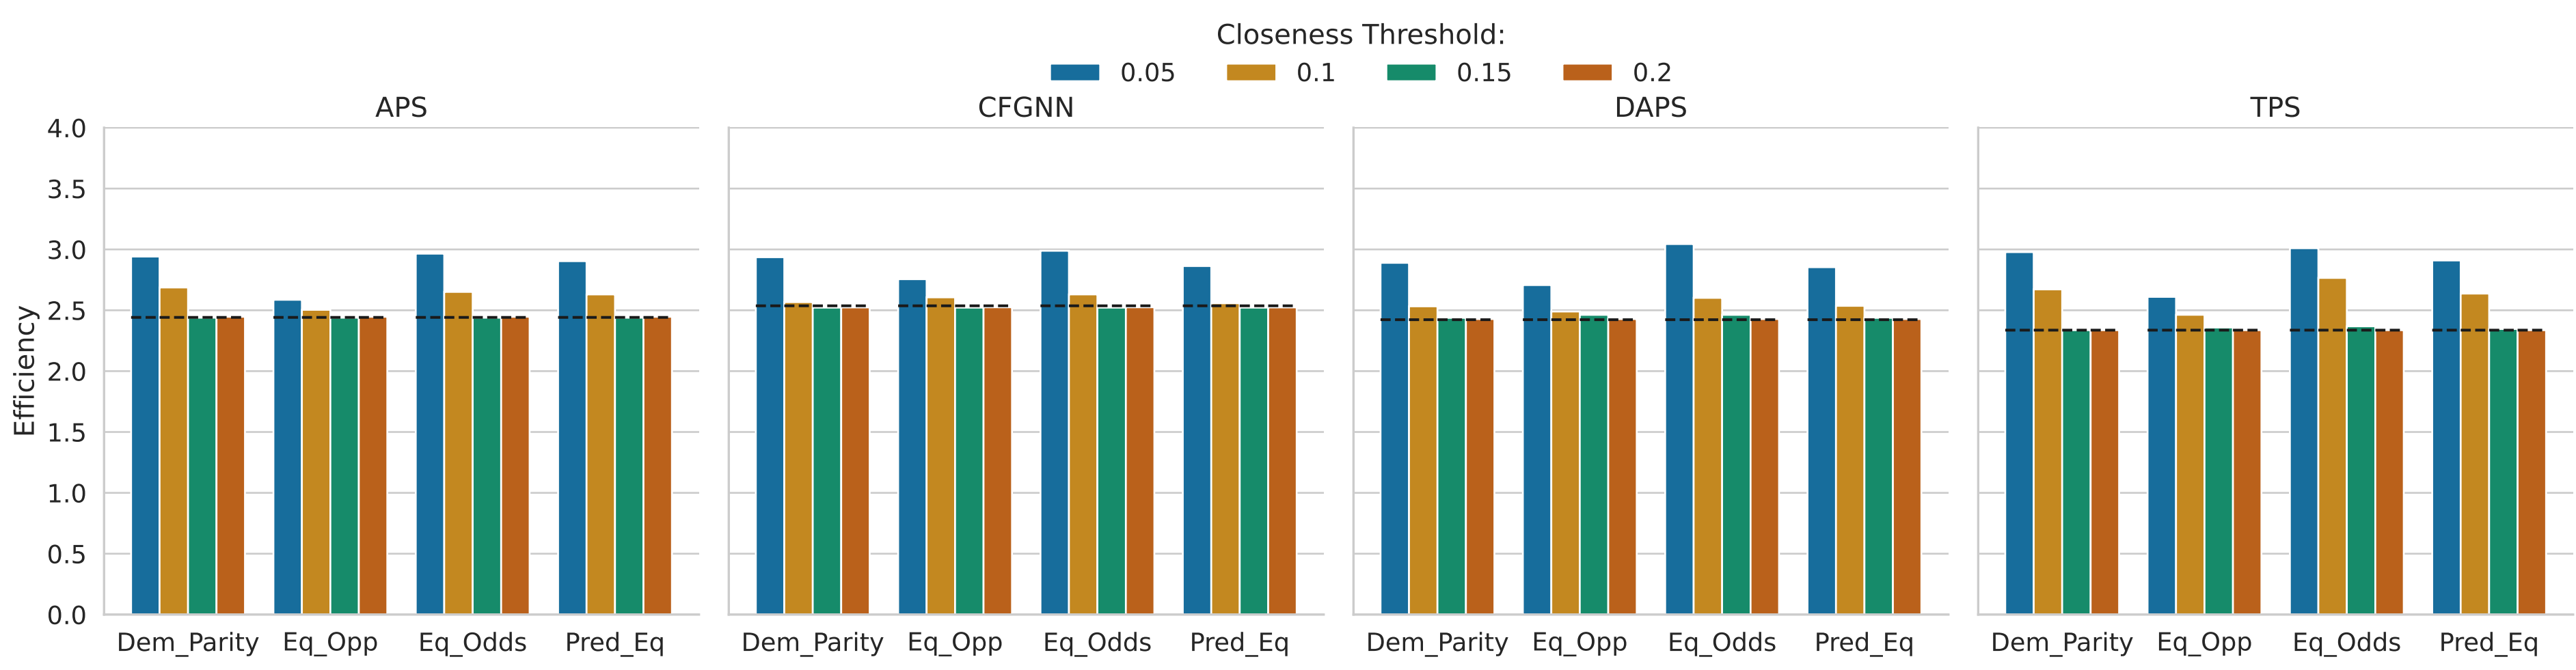

Supplement: supplementary_material [file attachment]

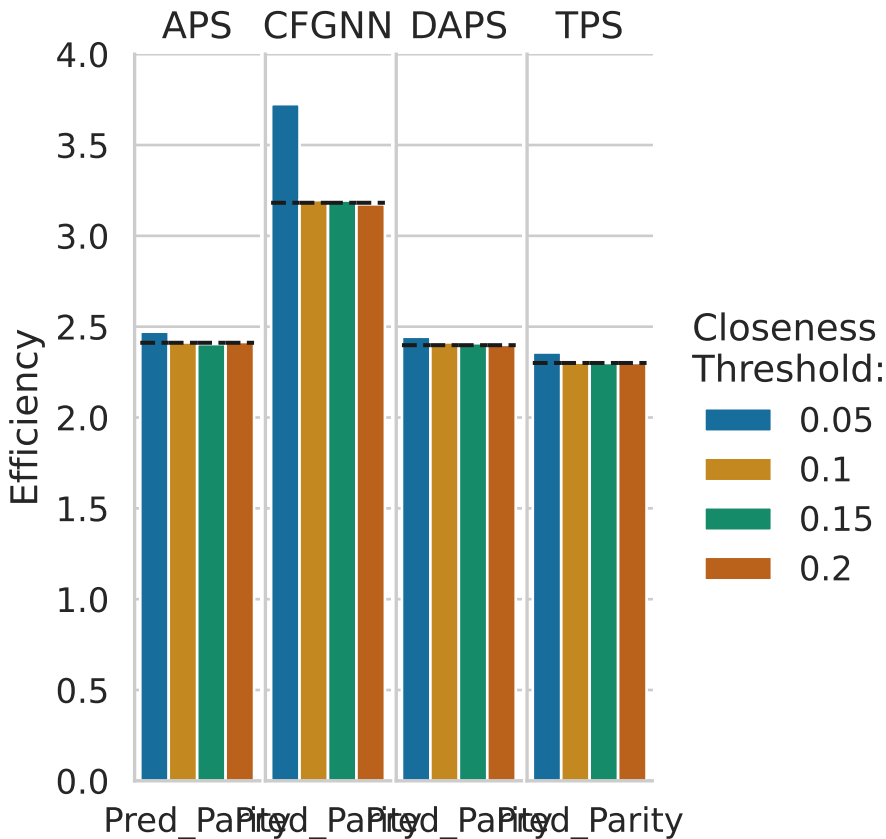

Supplement: supplementary_material [file attachment]

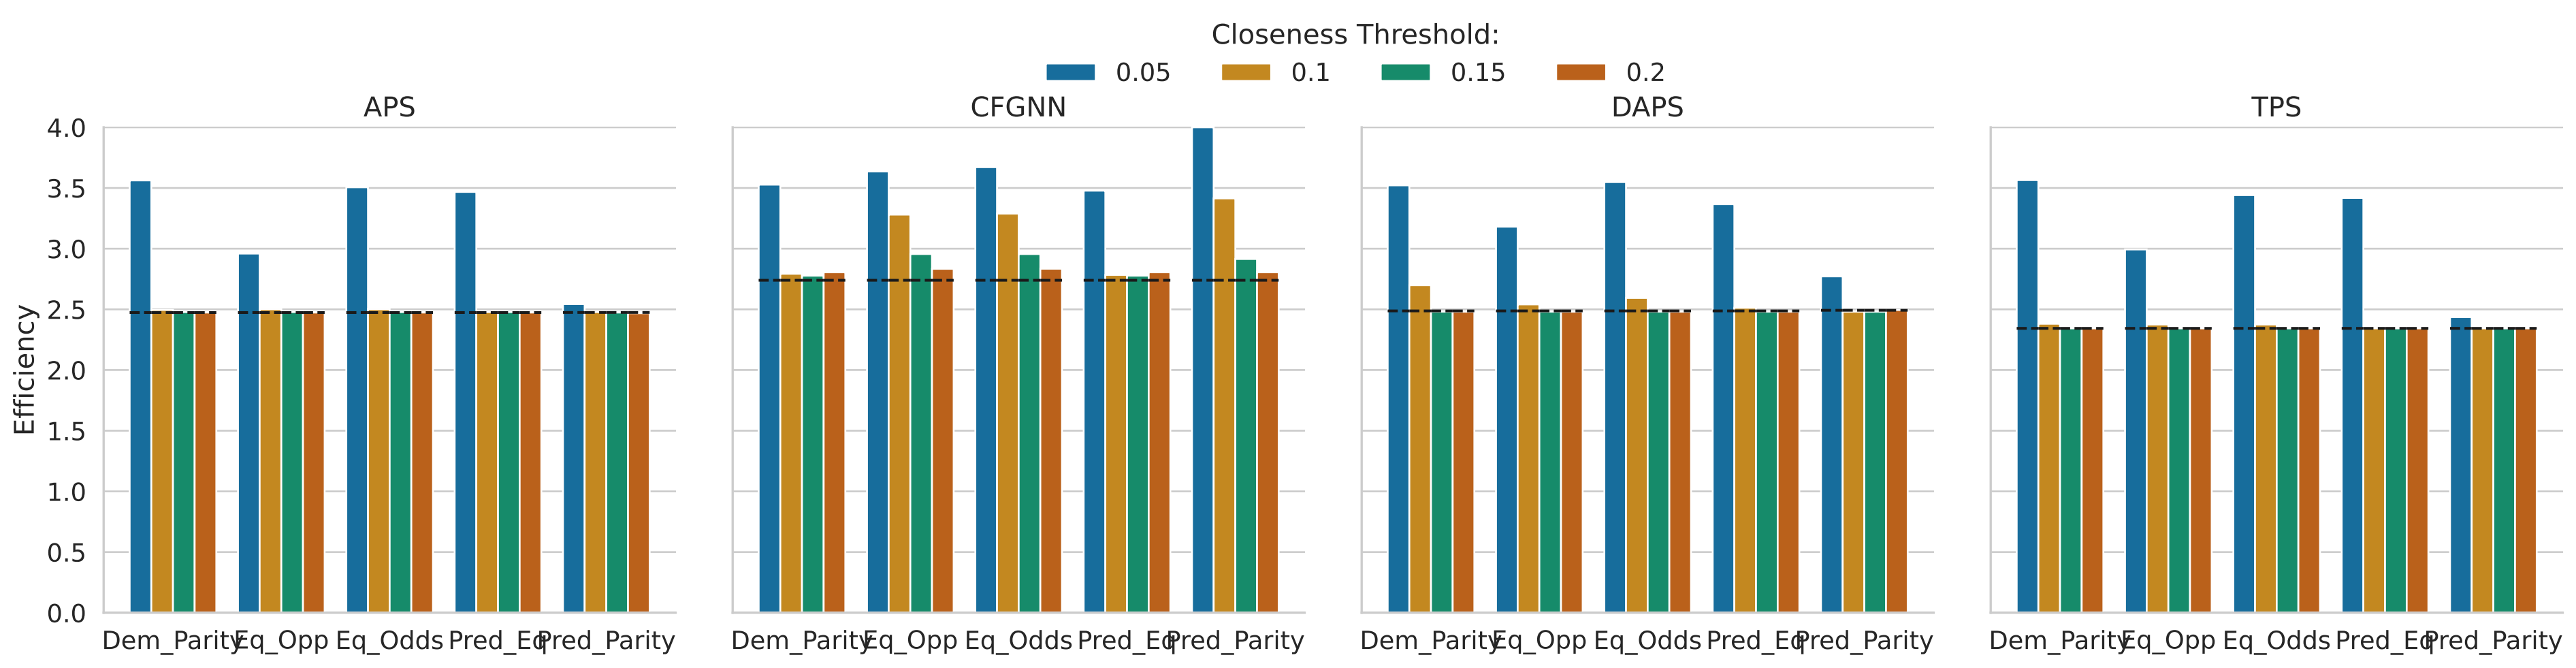

Supplement: supplementary_material [file attachment]

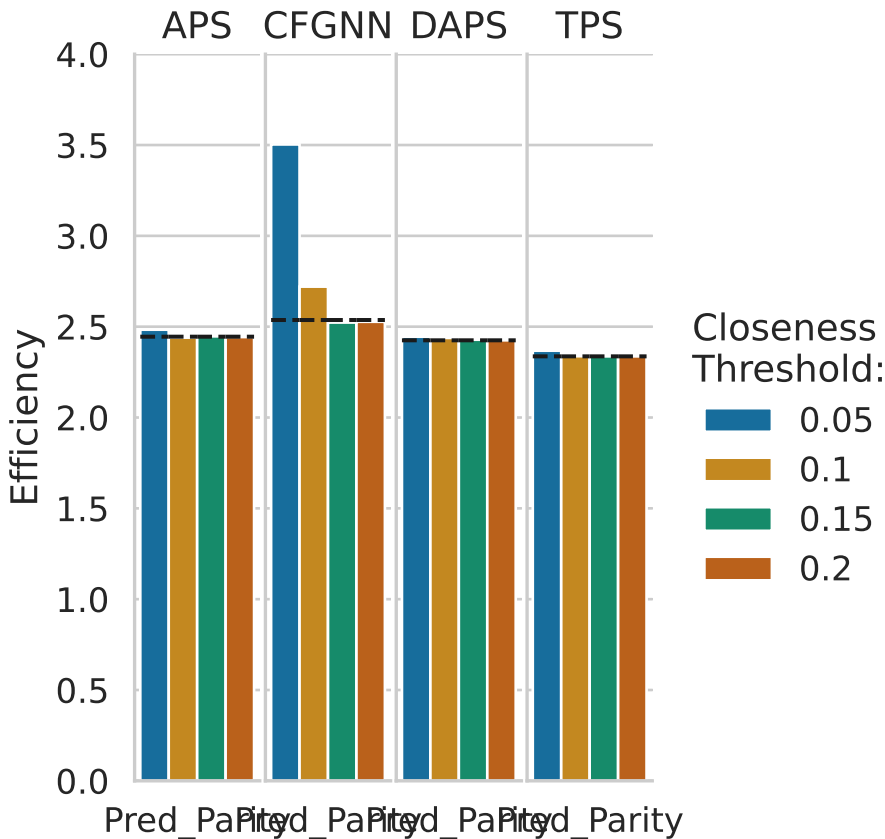

Supplement: supplementary_material [file attachment]

Closeness Threshold:

0.05

0.1

0.15

0.2

APS

TPS

Efficiency

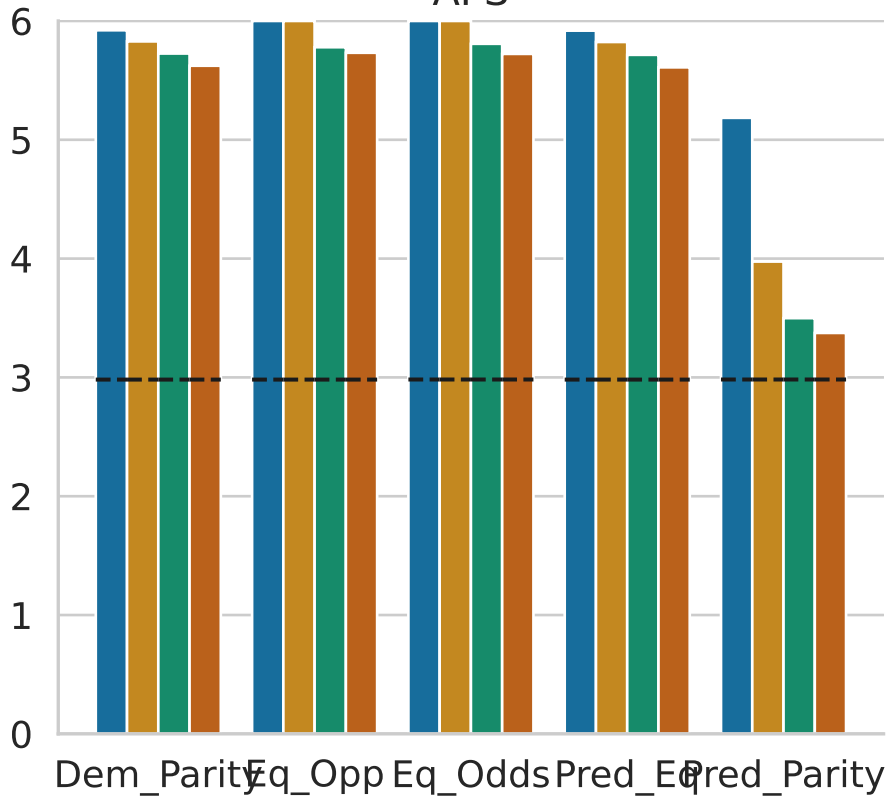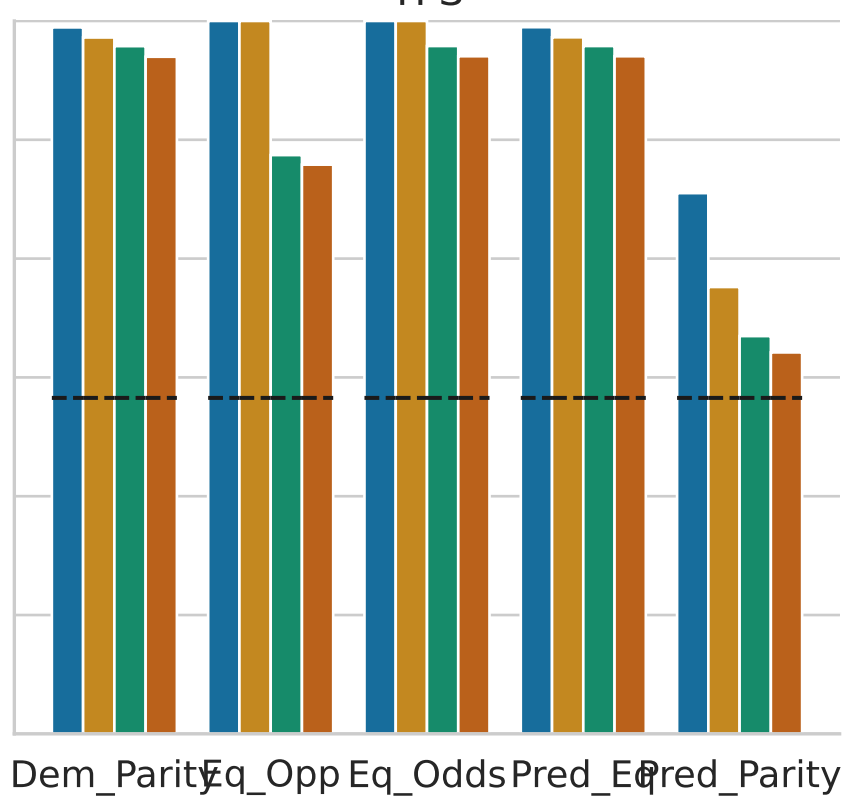

Supplement: supplementary_material [file attachment]

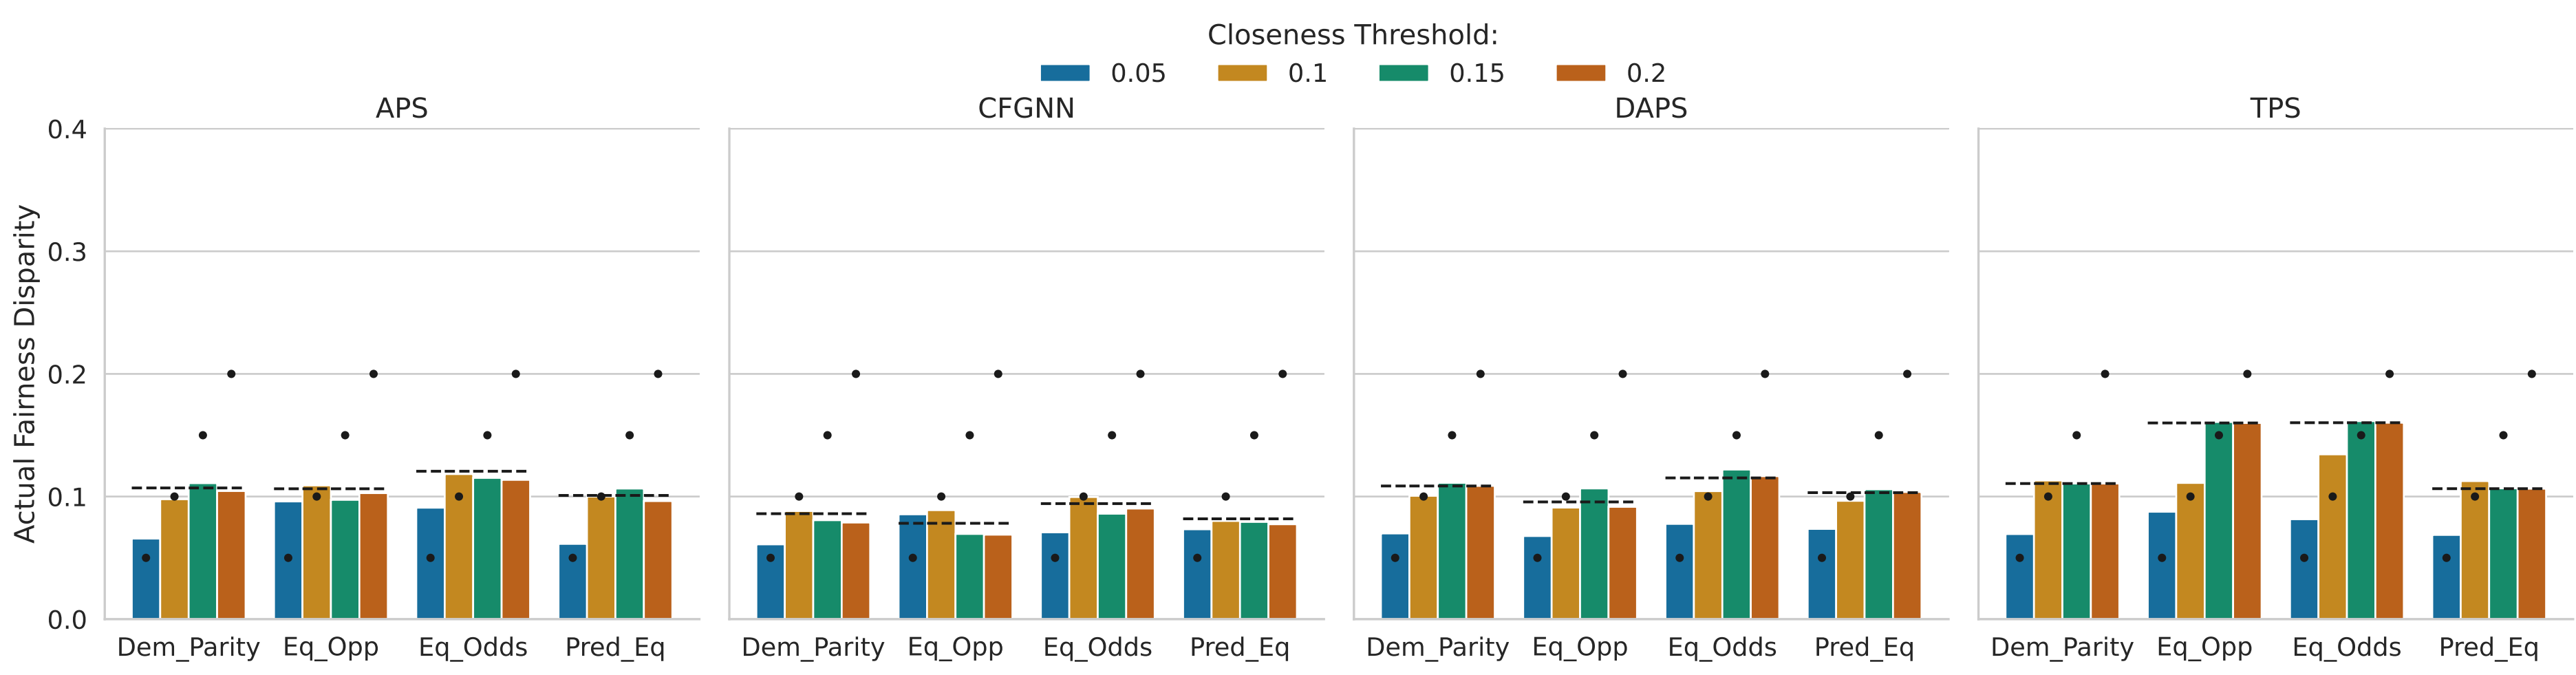

Supplement: supplementary_material [file attachment]

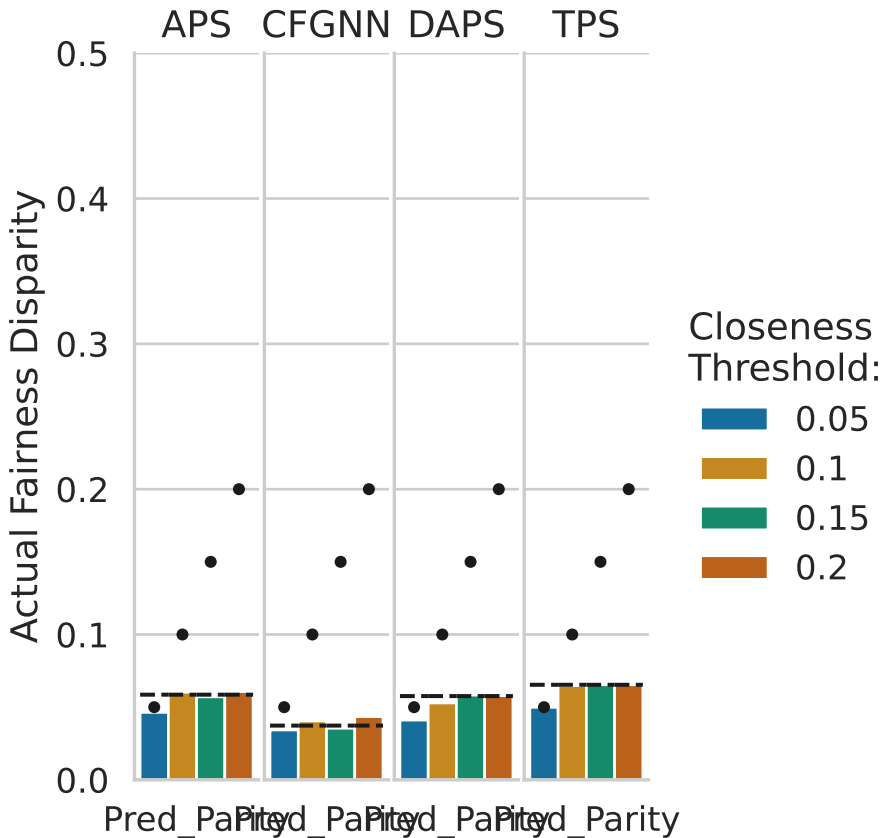

Supplement: supplementary_material [file attachment]

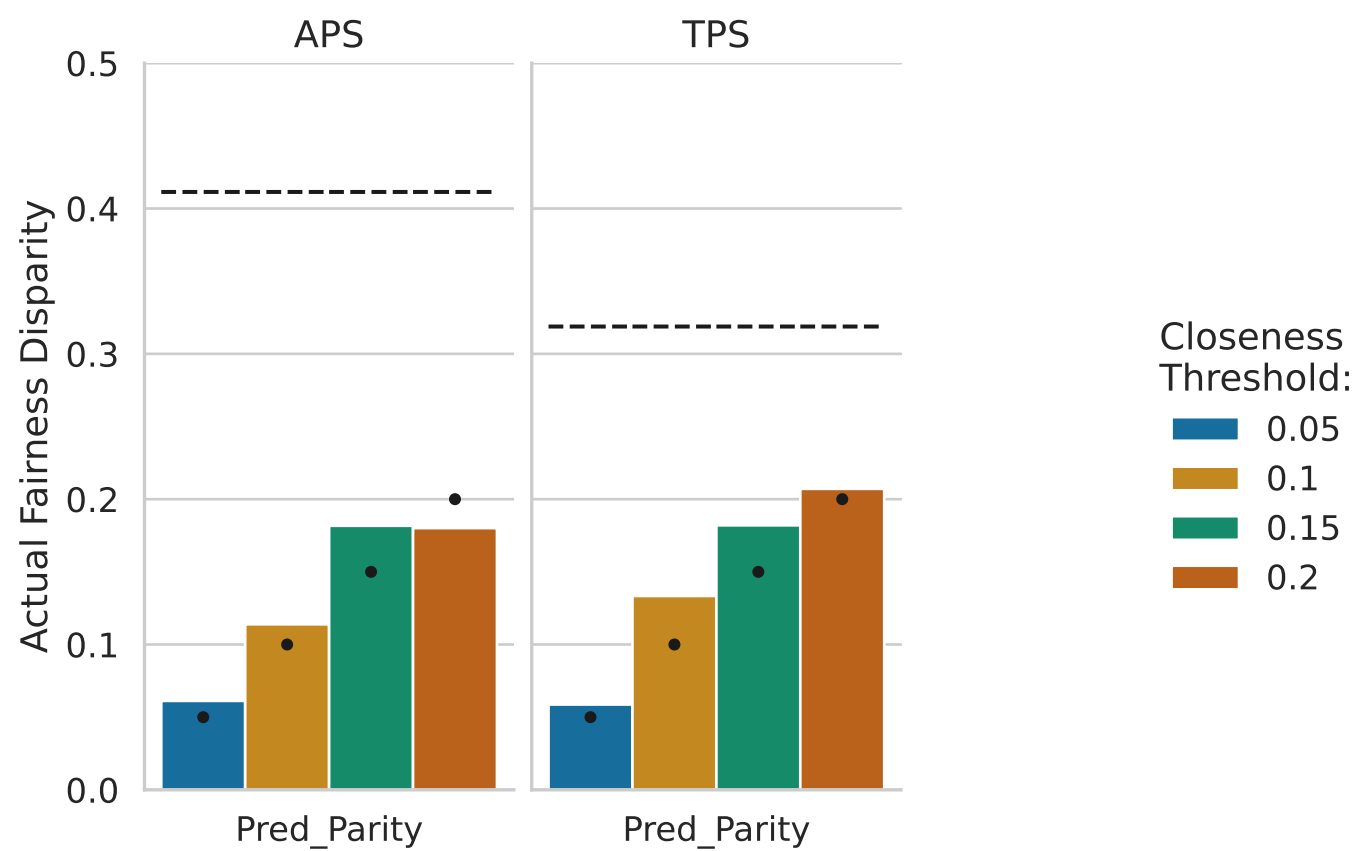

Supplement: supplementary_material [file attachment]

Closeness Threshold:

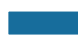

0.05

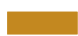

0.1

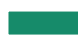

0.15

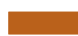

0.2

APS

TPS

Efficiency

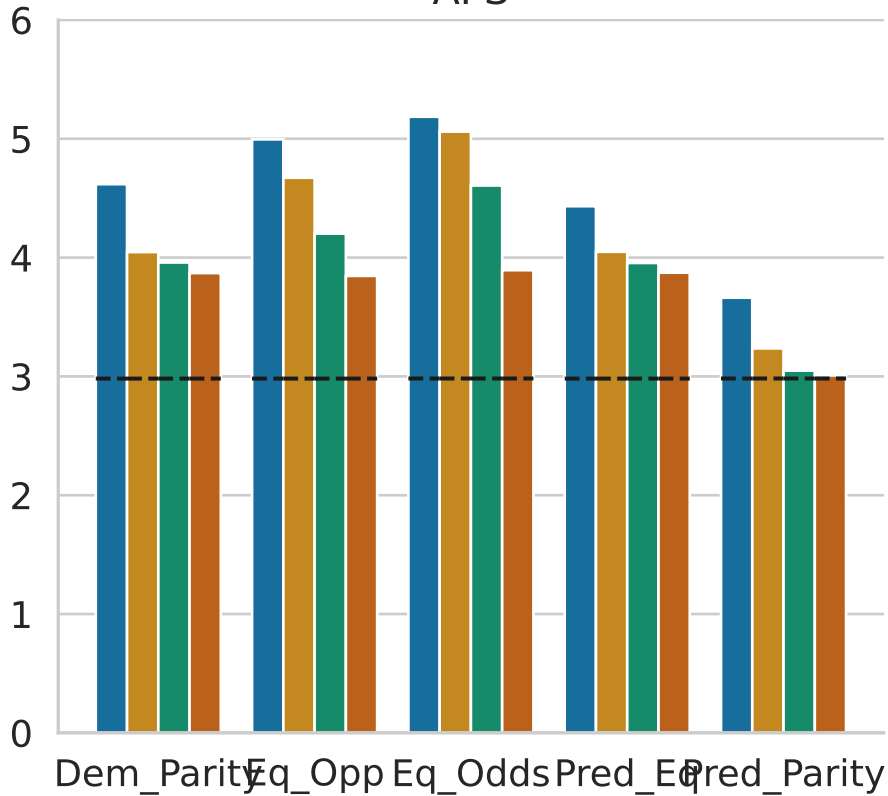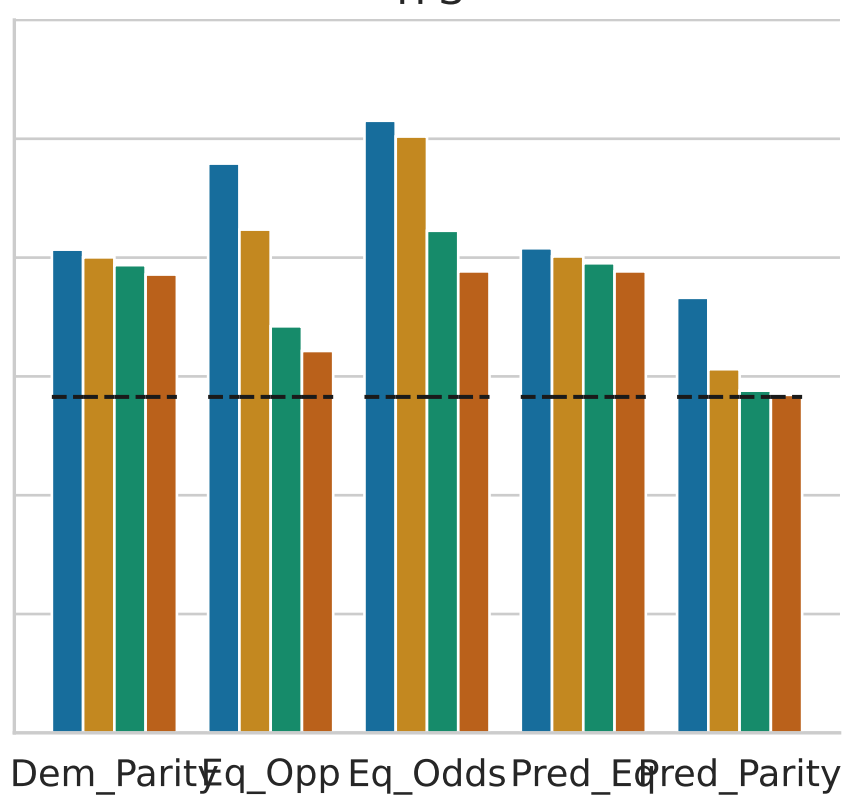

Supplement: supplementary_material [file attachment]

Closeness Threshold:

0.05

0.1

0.15

0.2

APS

CFGNN

Efficiency

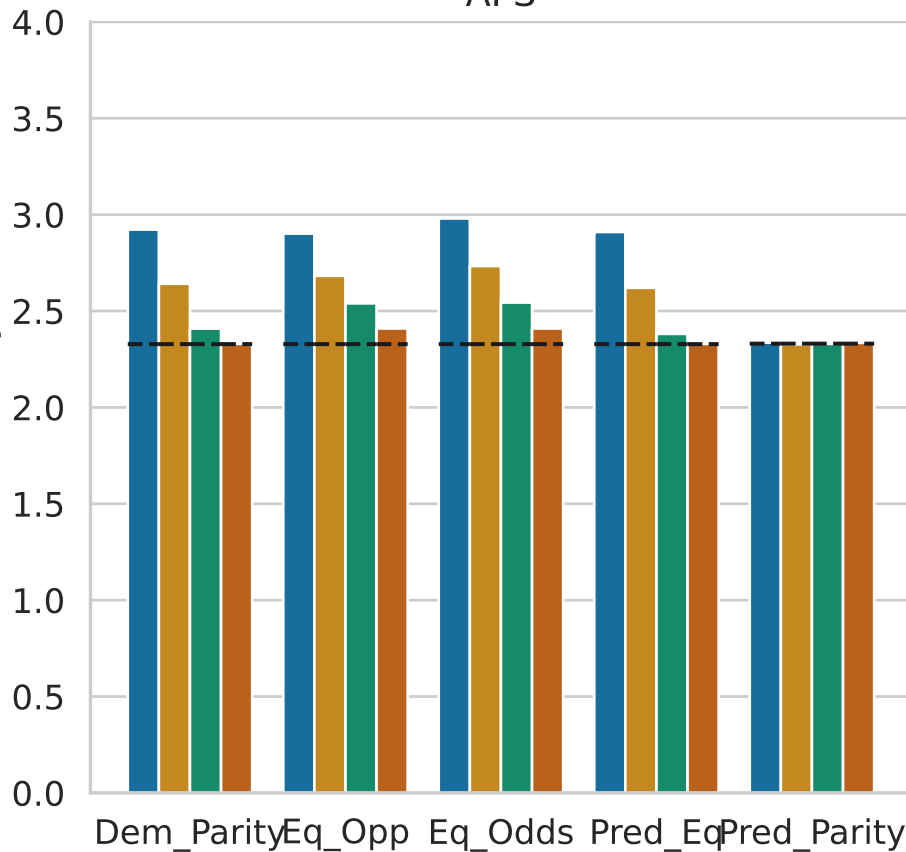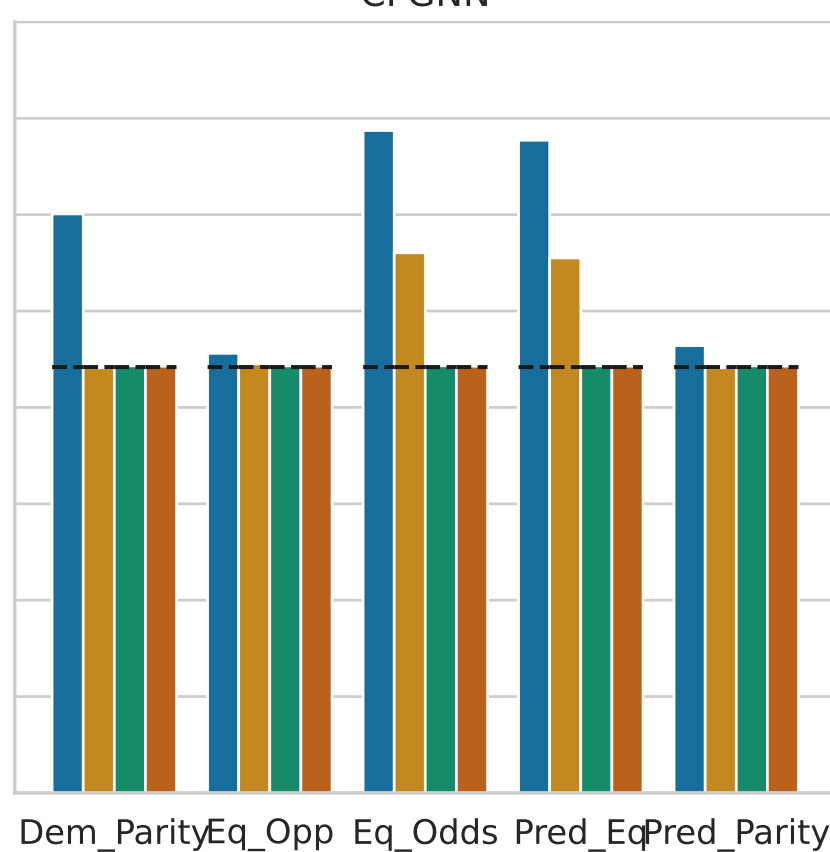

DAPS

TPS

Efficiency

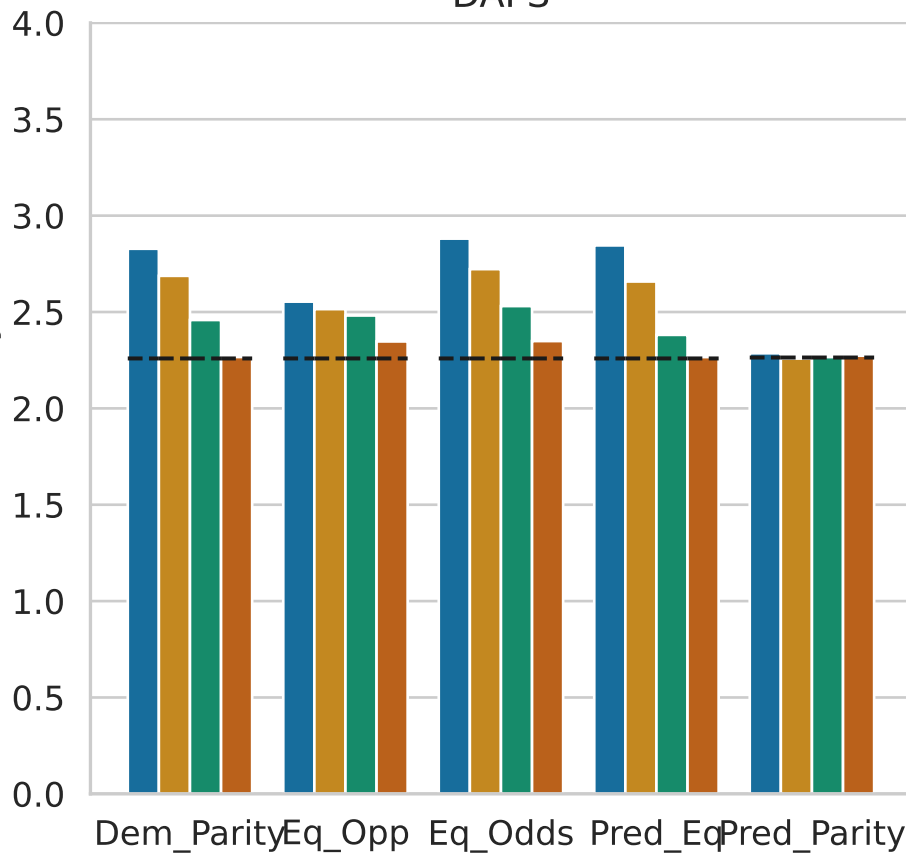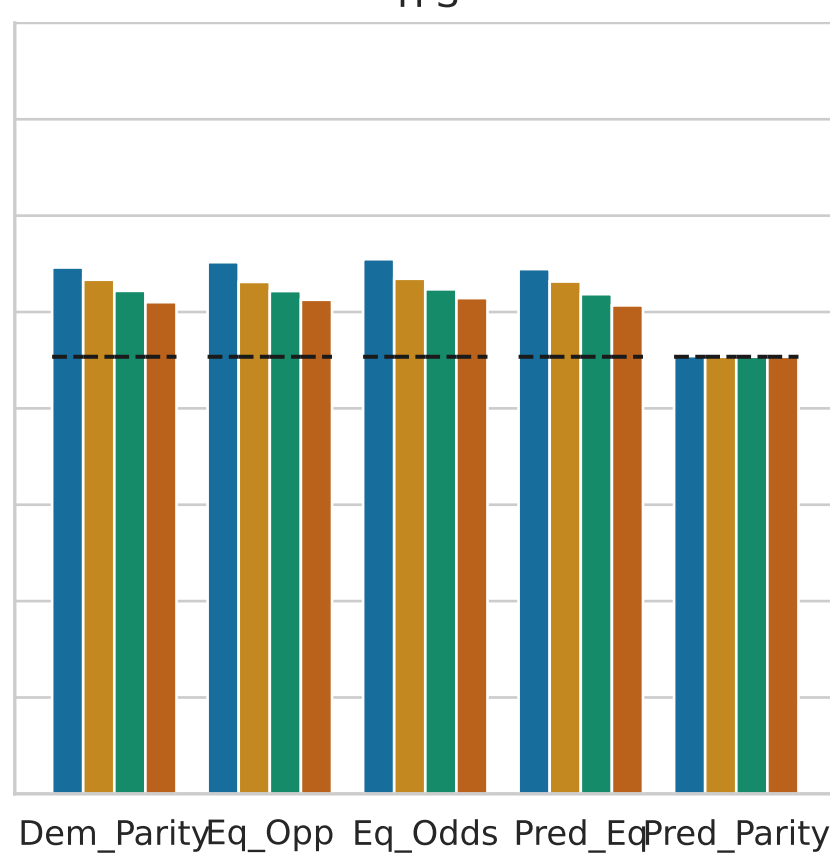

Supplement: supplementary_material [file attachment]

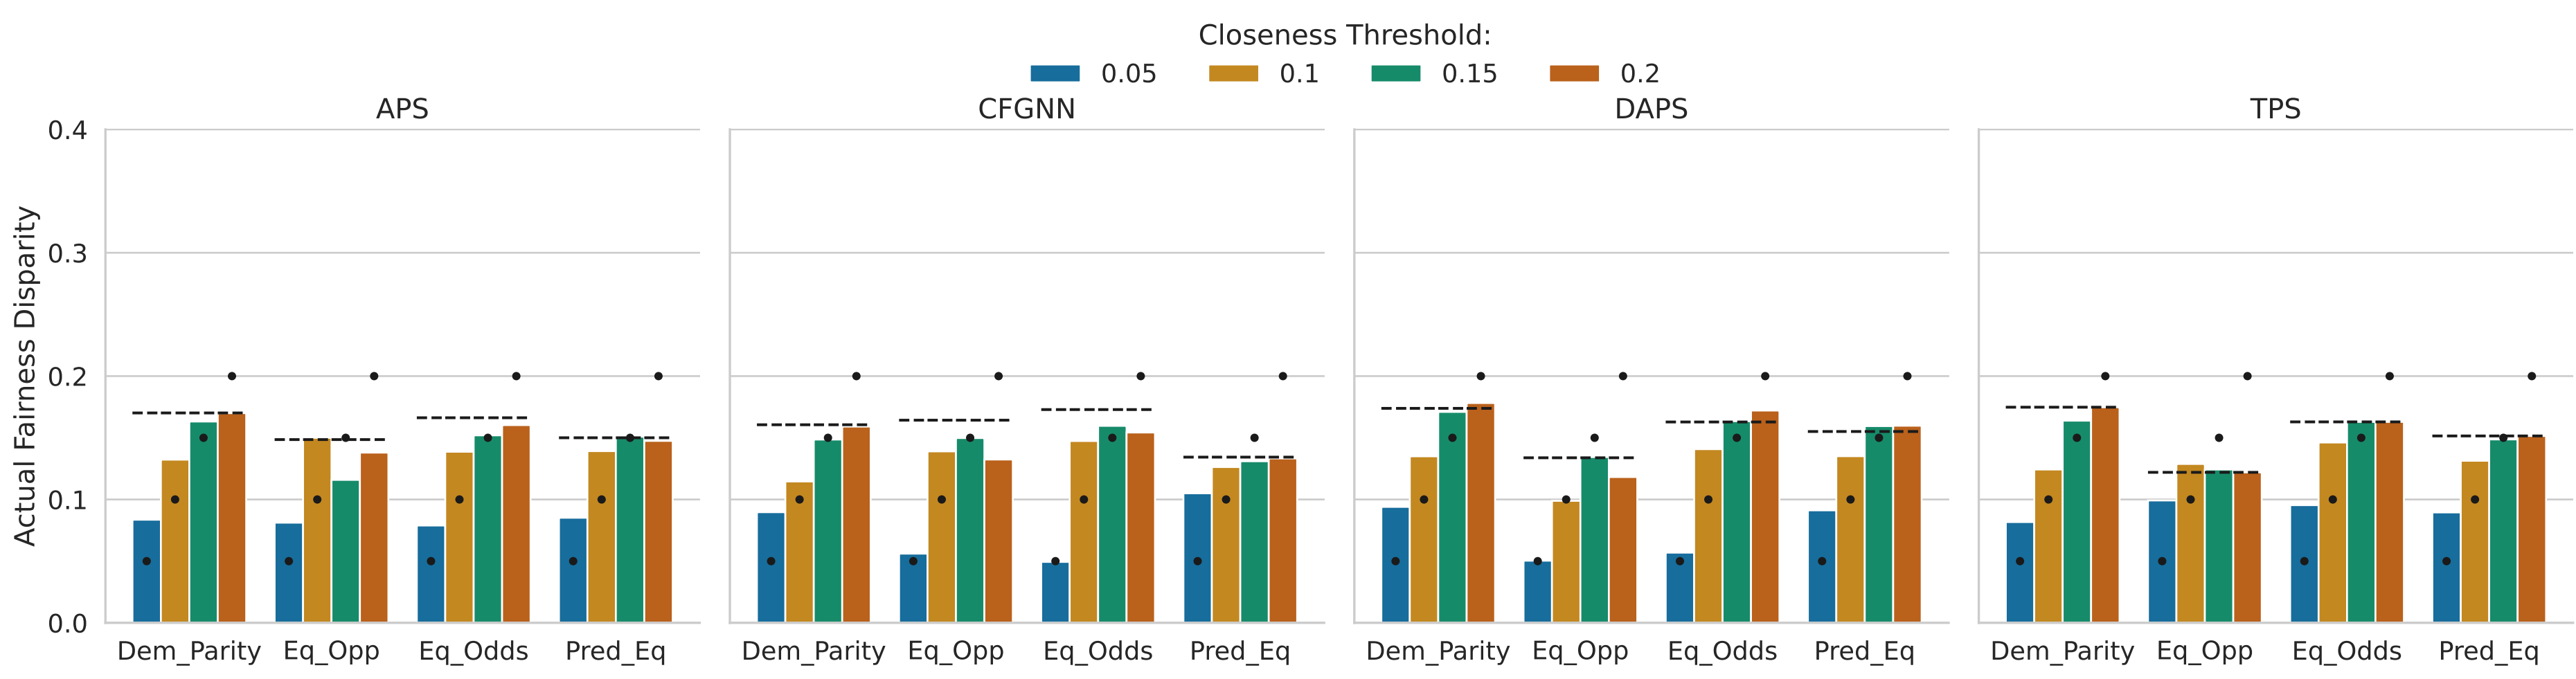

Supplement: supplementary_material [file attachment]

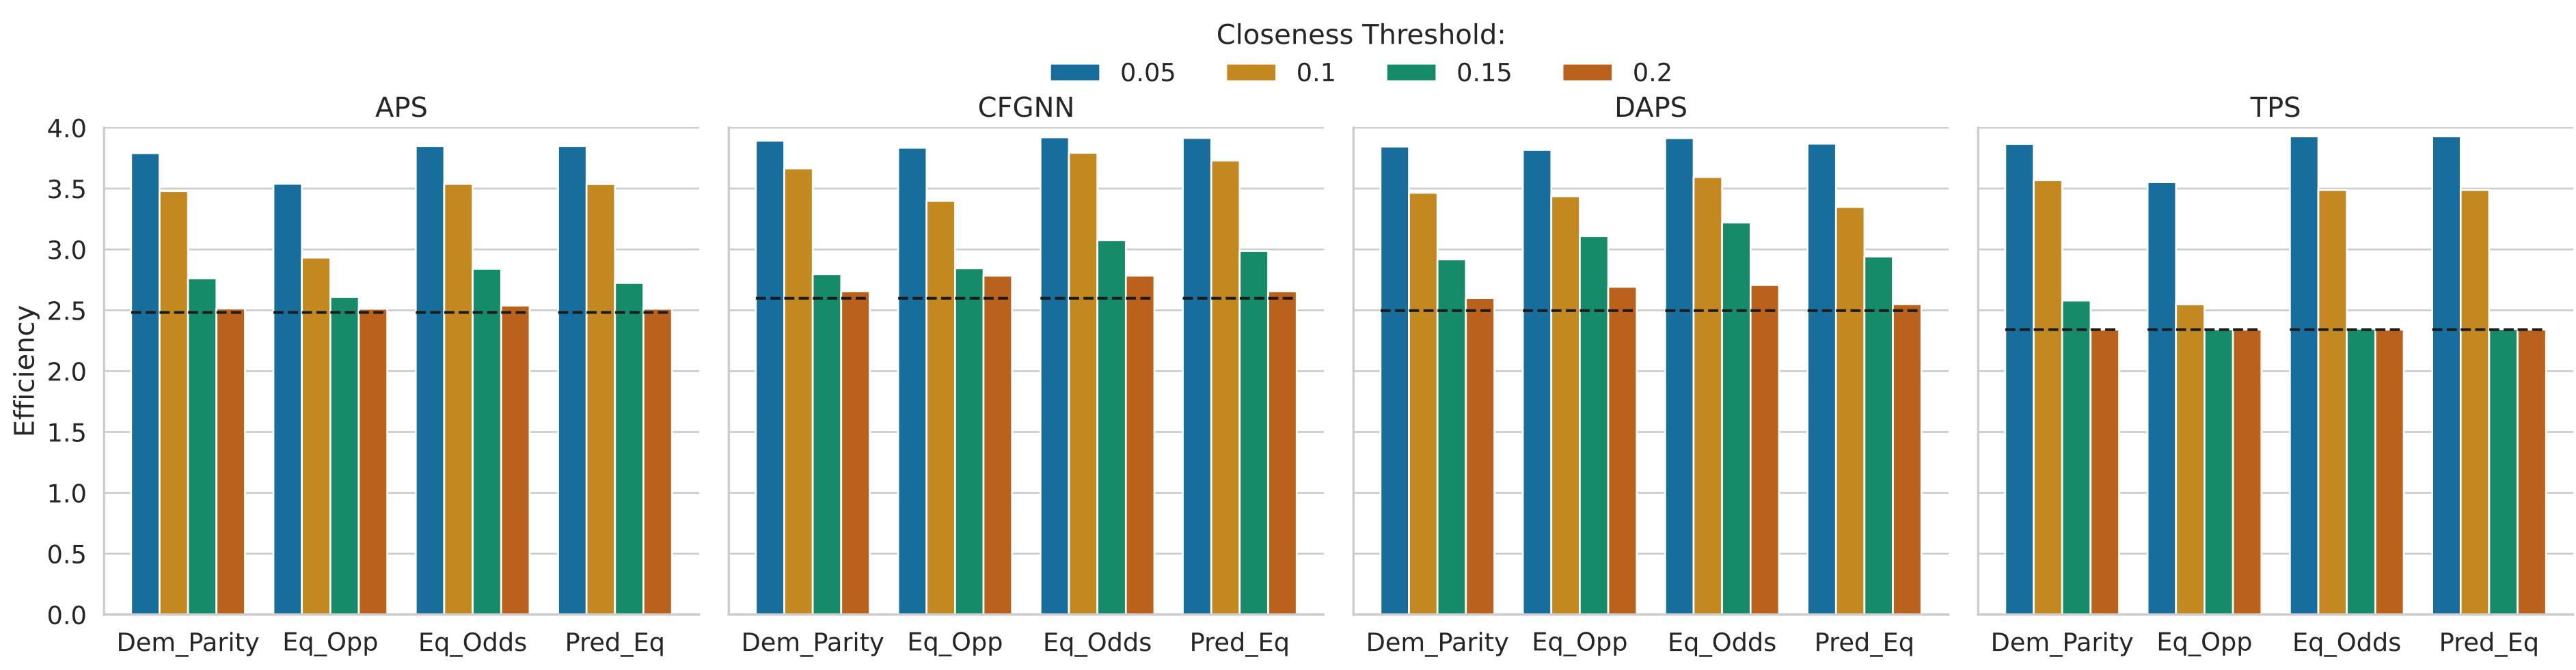

Supplement: supplementary_material [file attachment]

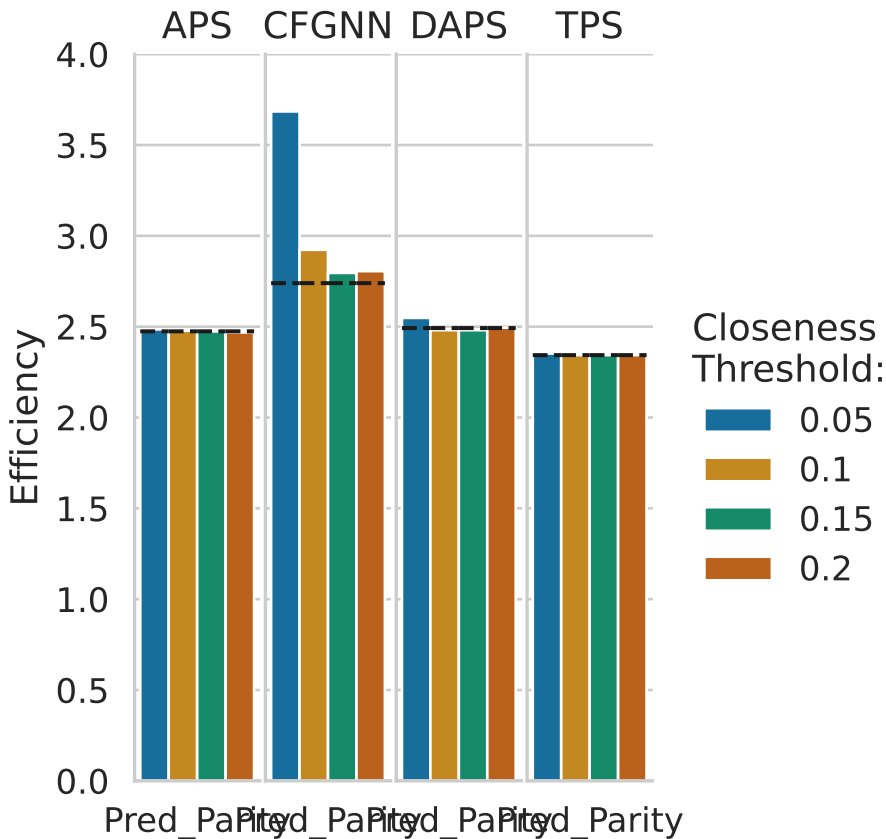

Supplement: supplementary_material [file attachment]

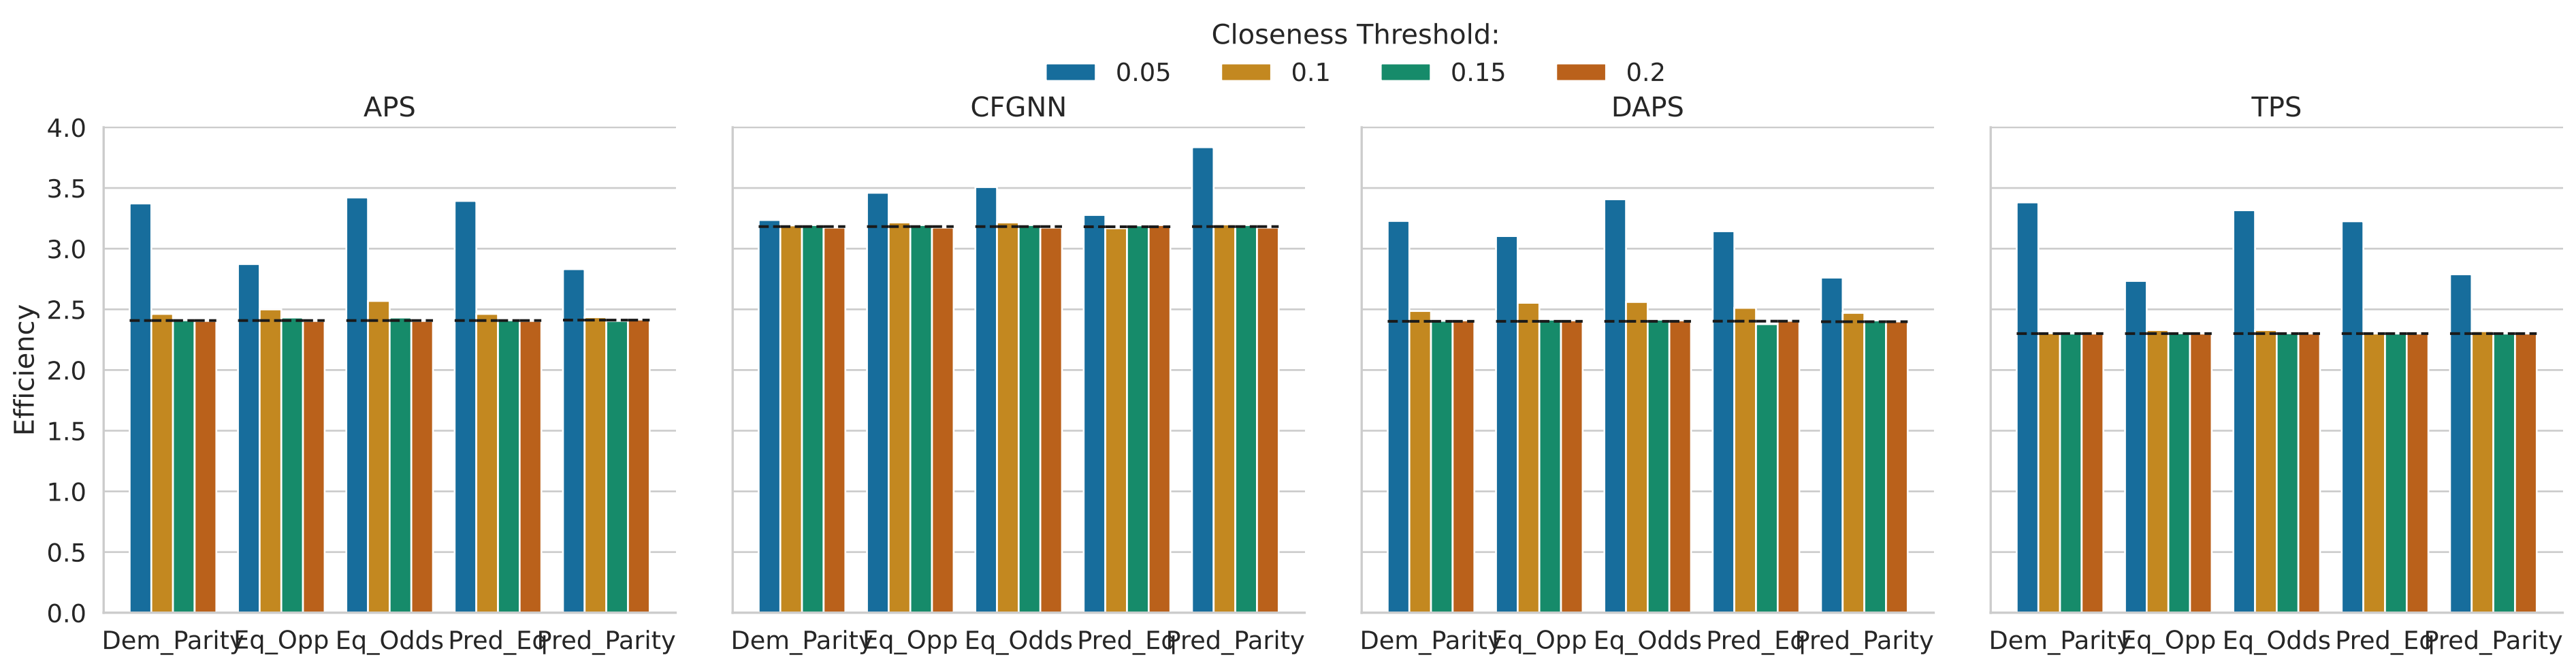

Supplement: supplementary_material [file attachment]

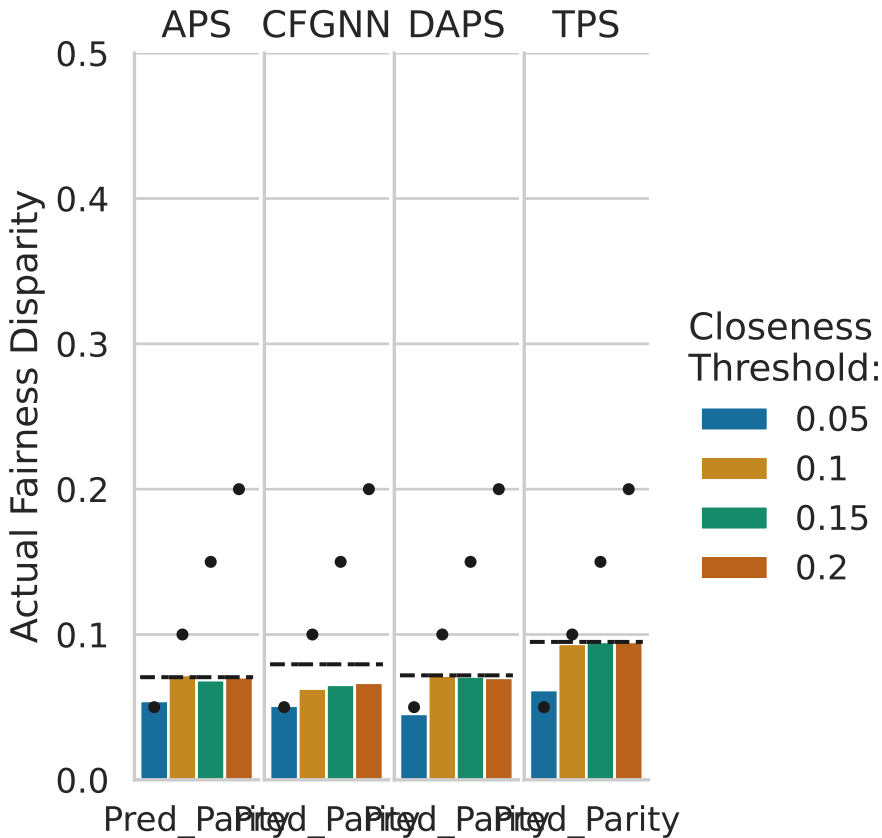

Supplement: supplementary_material [file attachment]

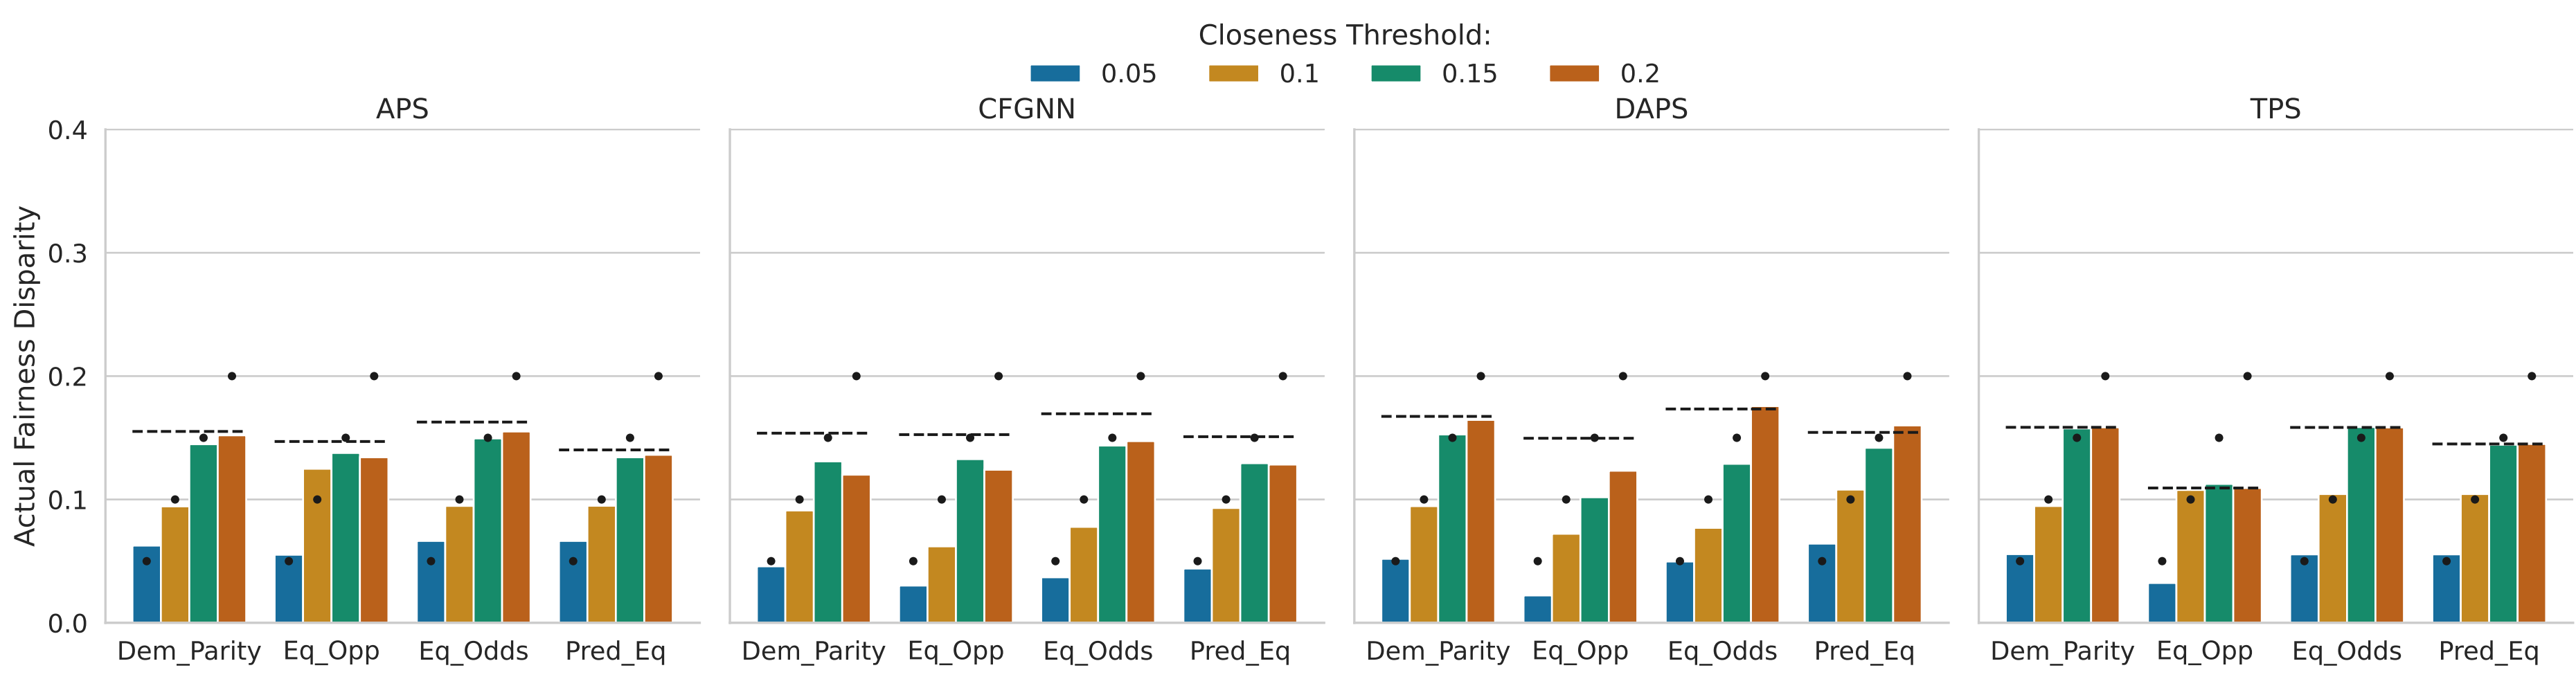

Supplement: supplementary_material [file attachment]

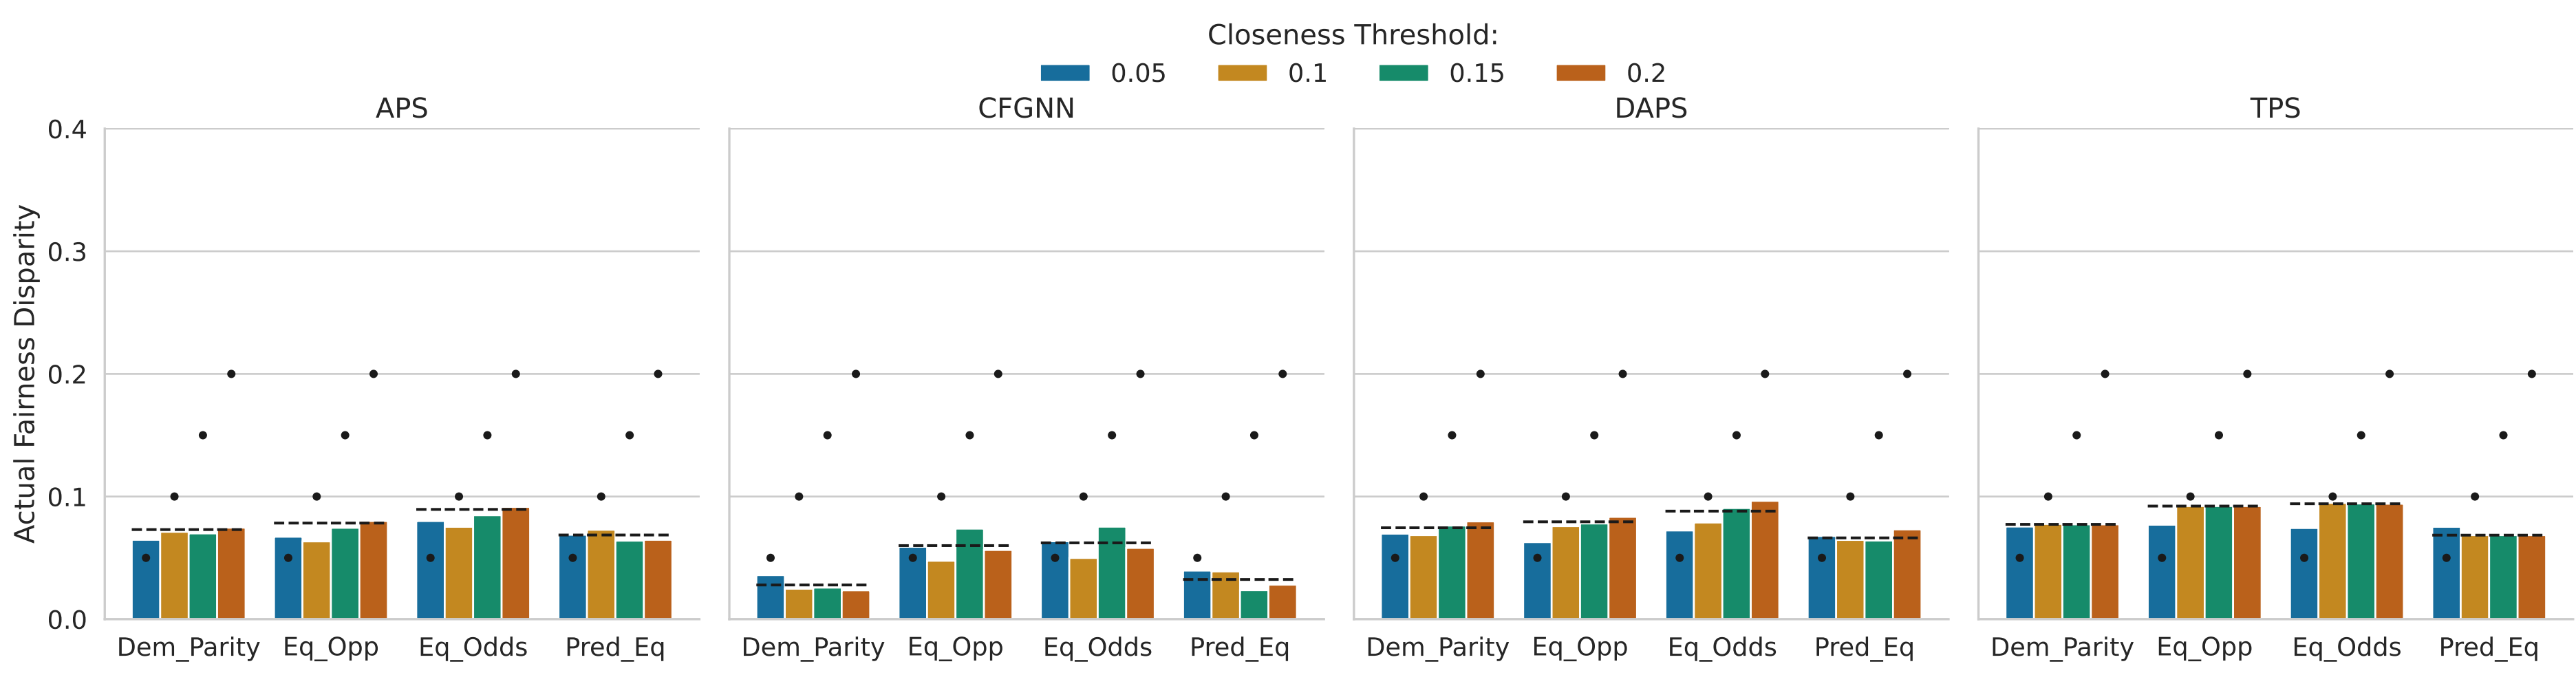

Supplement: supplementary_material [file attachment]

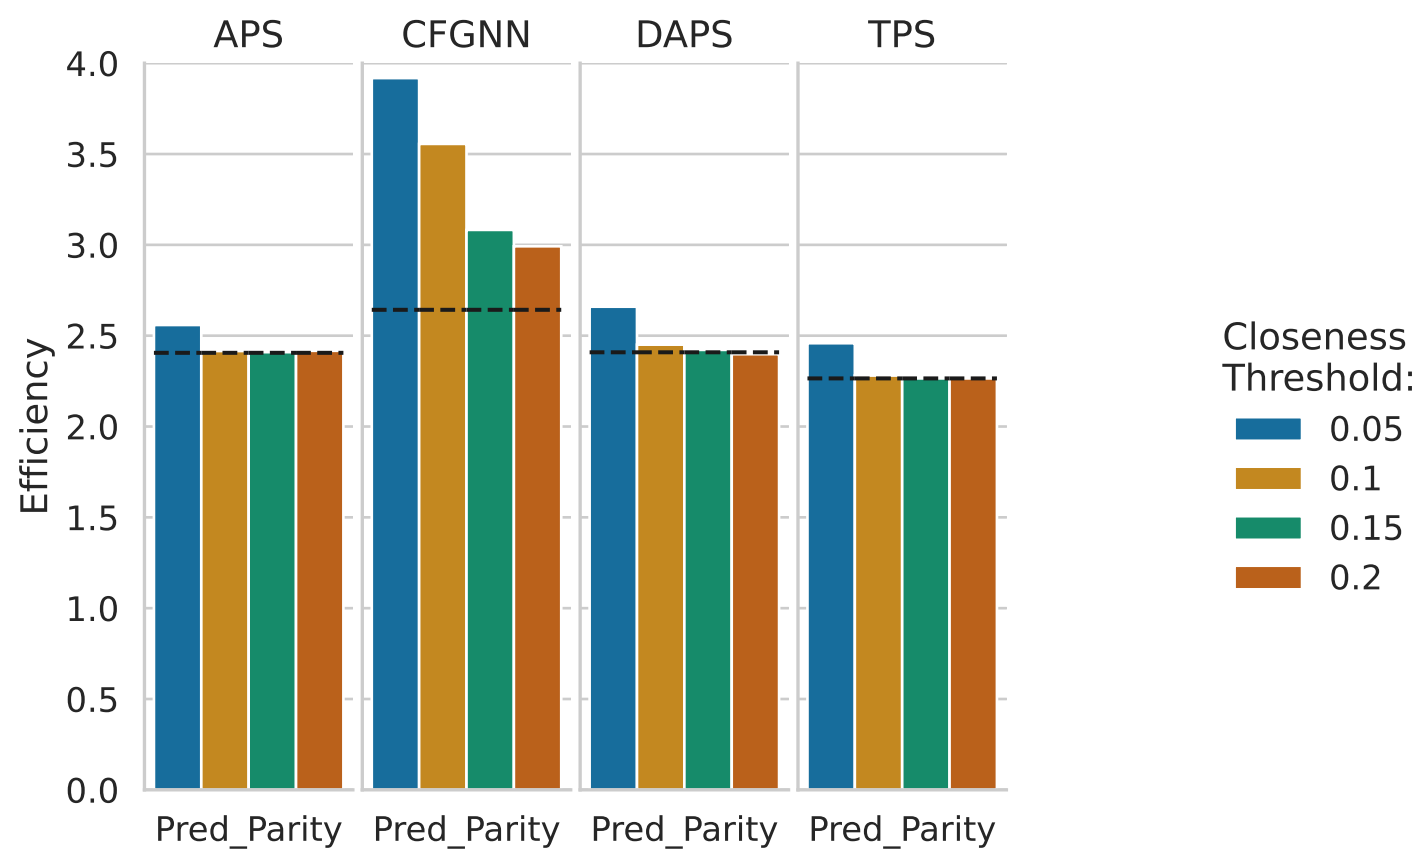

Supplement: supplementary_material [file attachment]

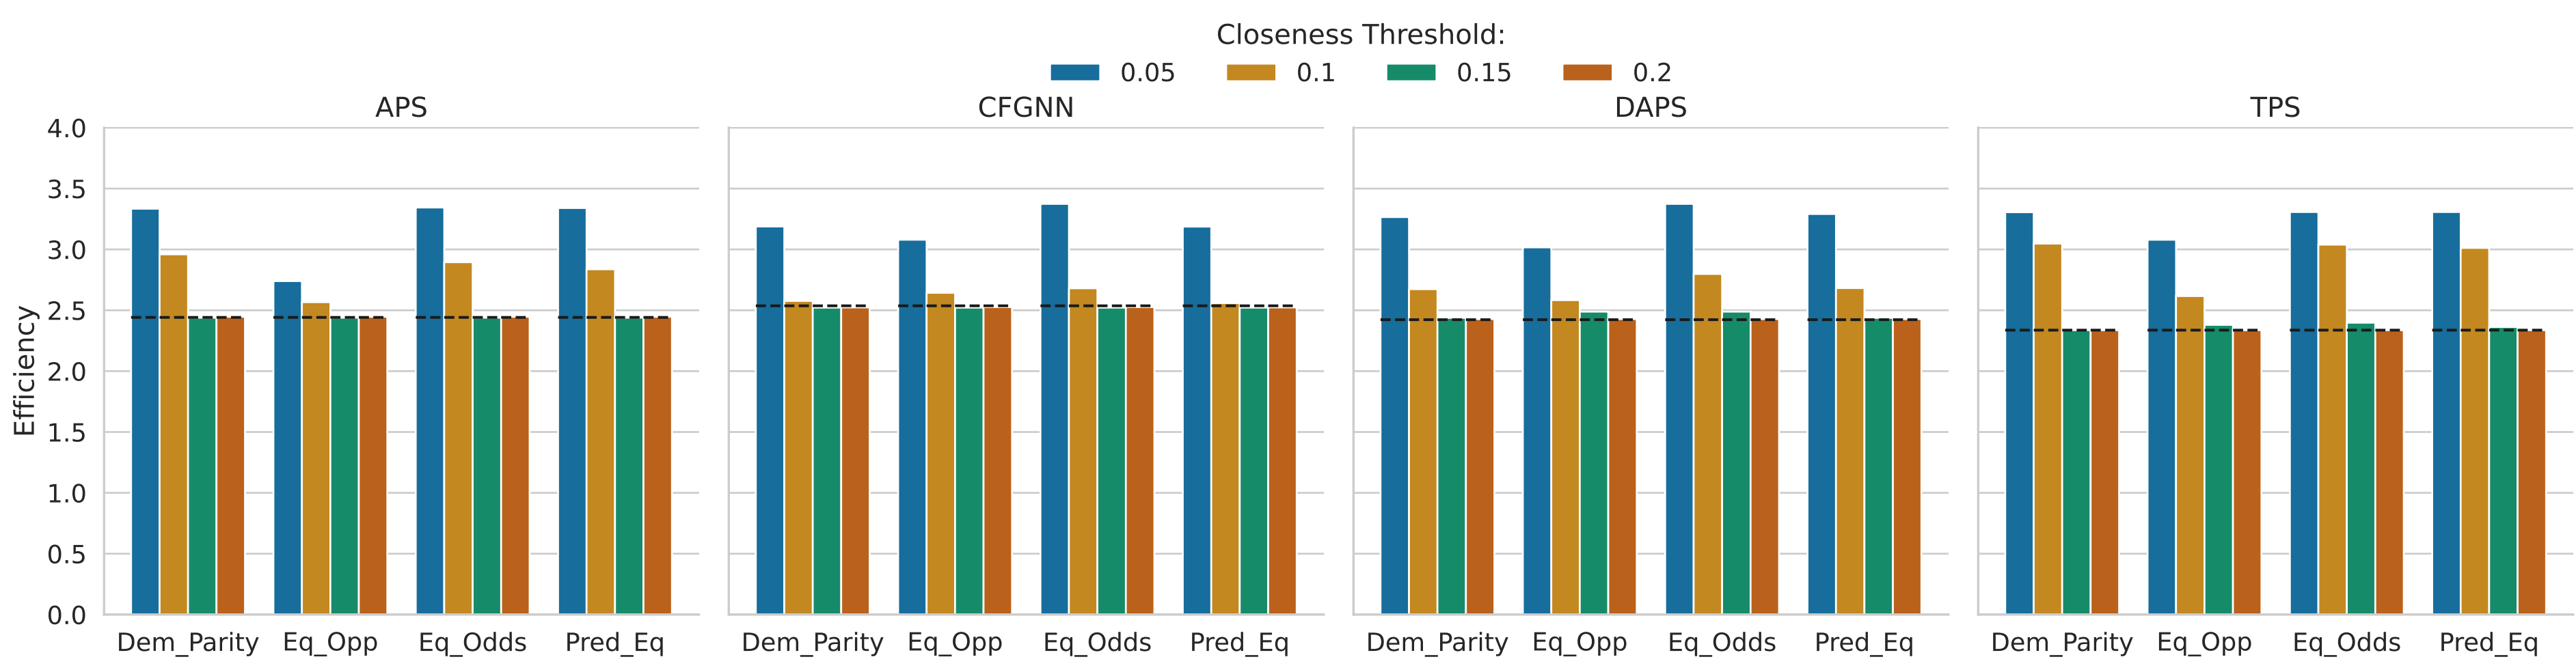

Supplement: supplementary_material [file attachment]

Closeness Threshold:

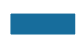

0.05

0.1

0.15

0.2

APS

CFGNN

Actual Fairness Disparity

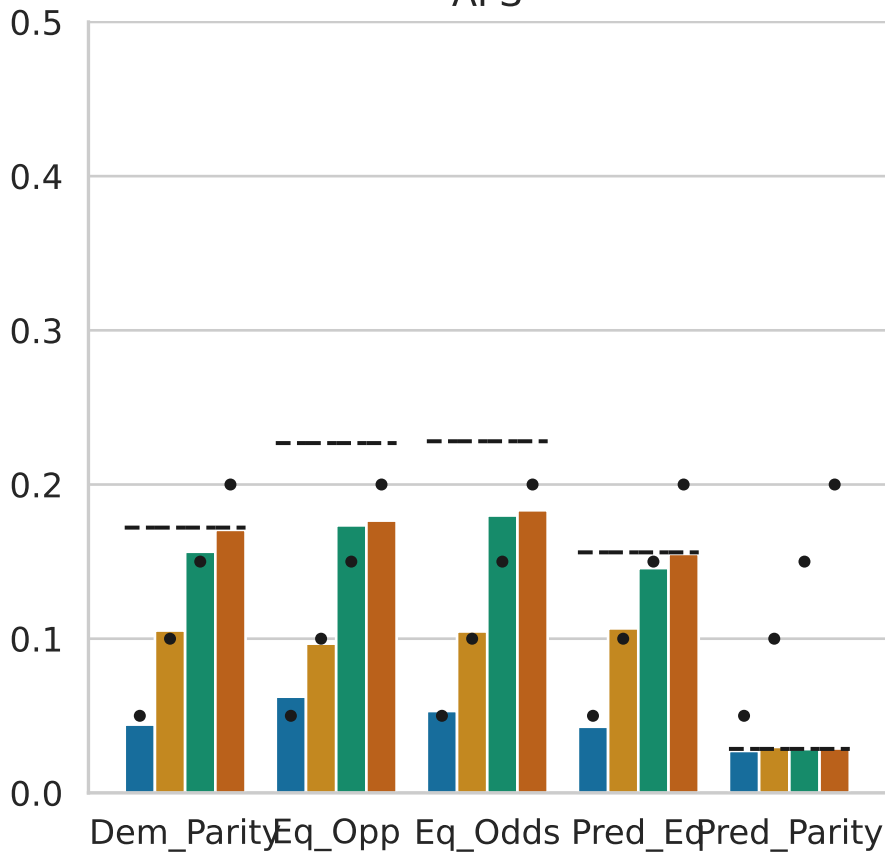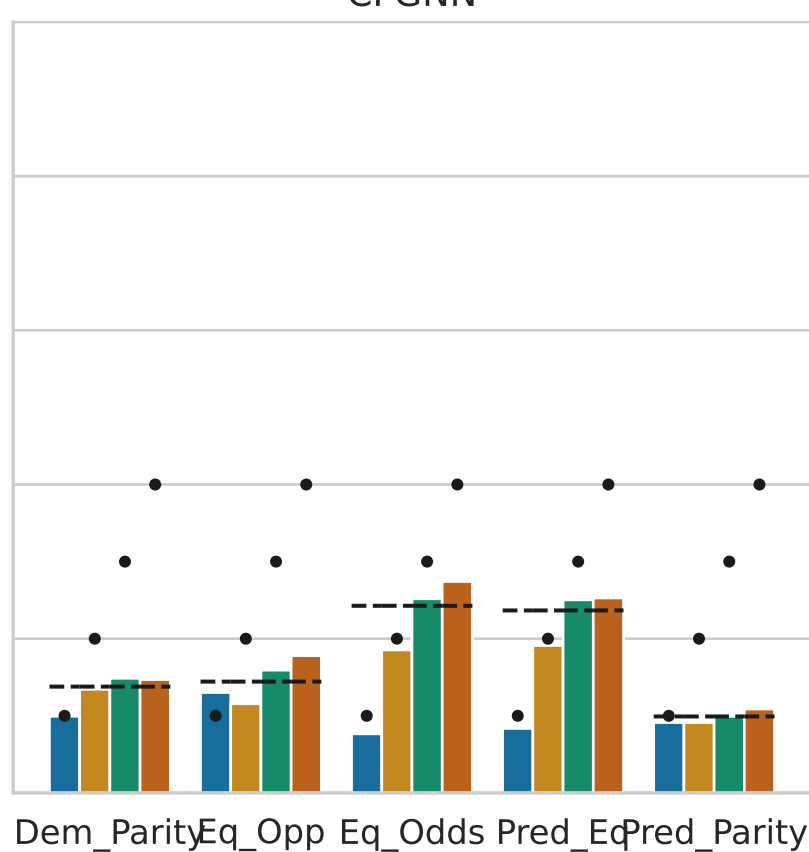

DAPS

TPS

Actual Fairness Disparity

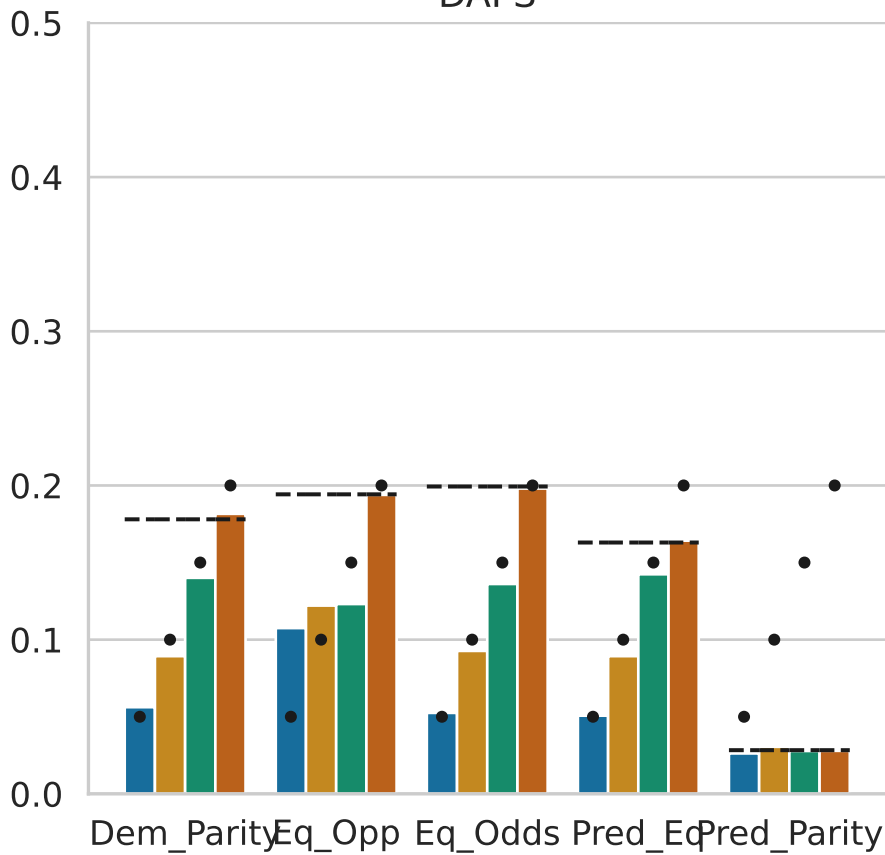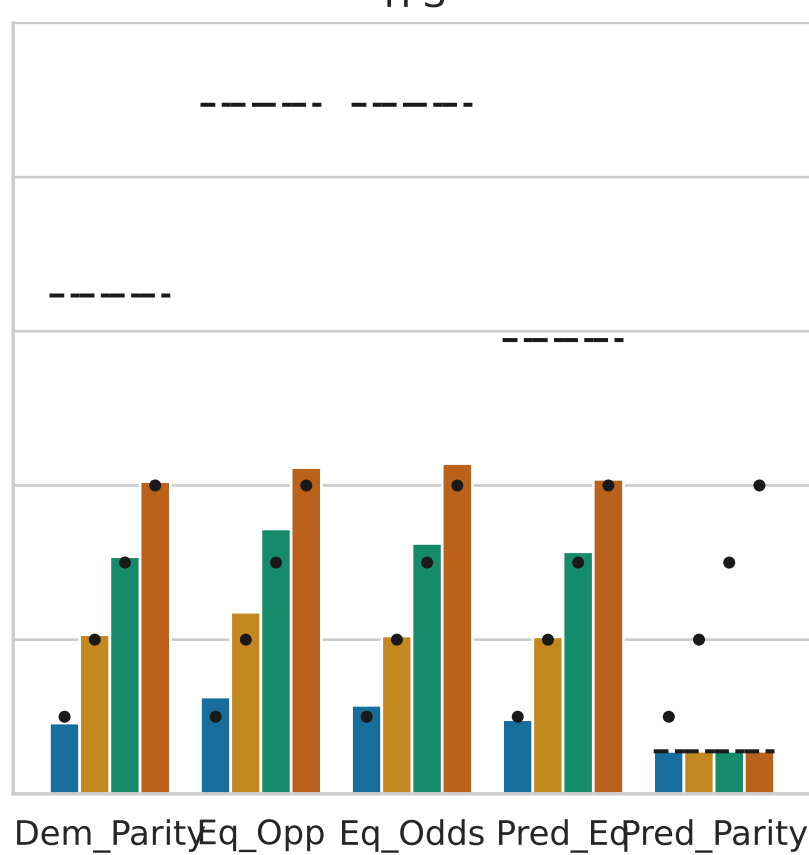

Supplement: supplementary_material [file attachment]

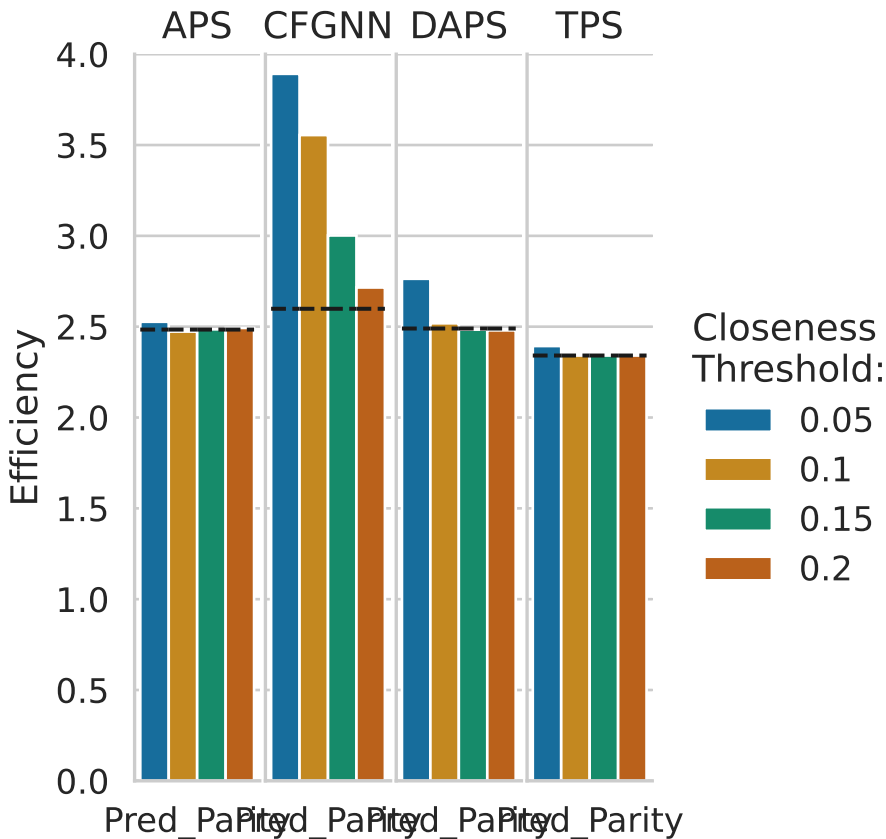

Supplement: supplementary_material [file attachment]

Closeness Threshold:

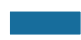

0.05

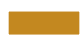

0.1

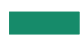

0.15

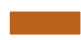

0.2

APS

TPS

Actual Fairness Disparity

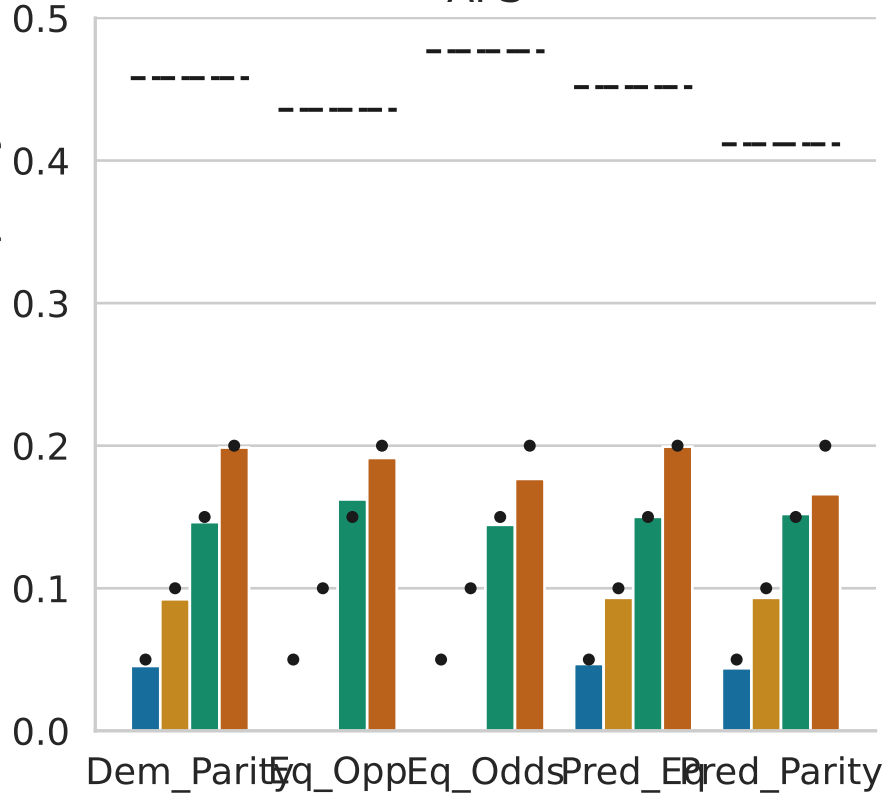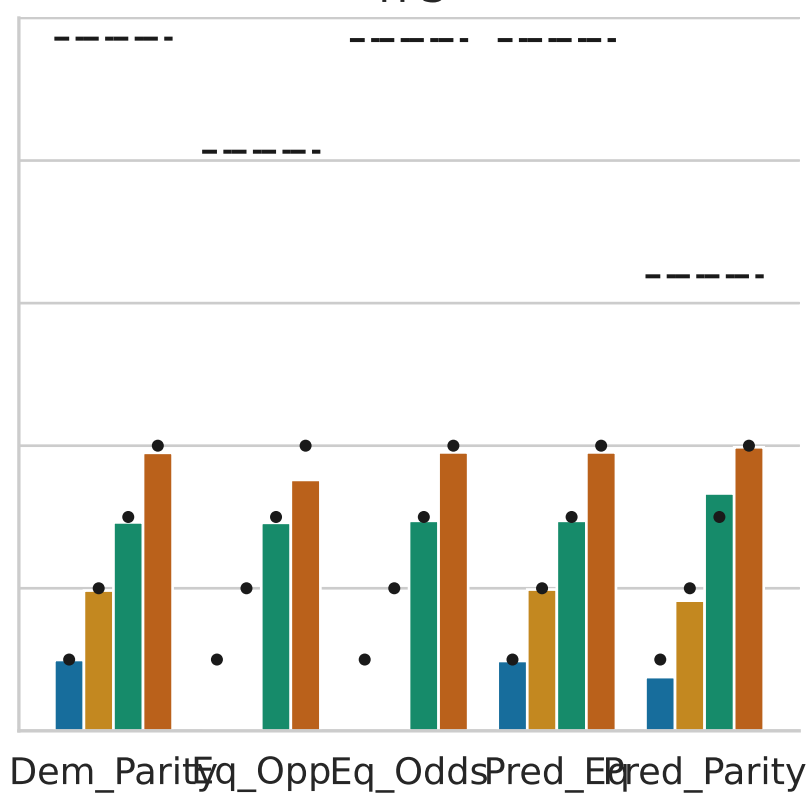

Supplement: supplementary_material [file attachment]

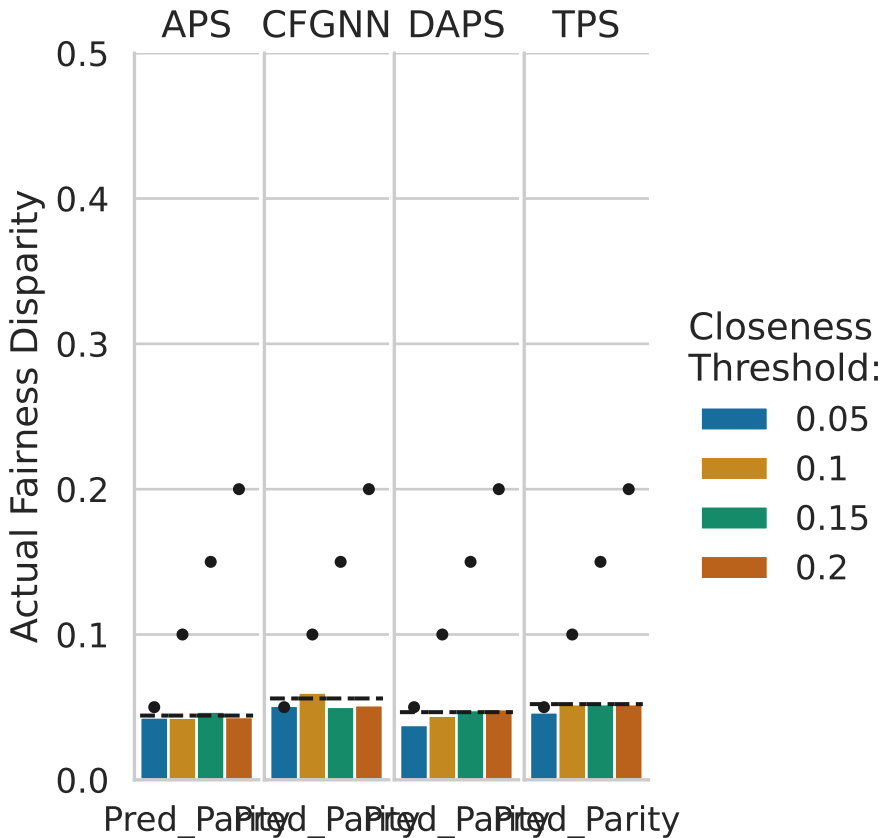

Supplement: supplementary_material [file attachment]

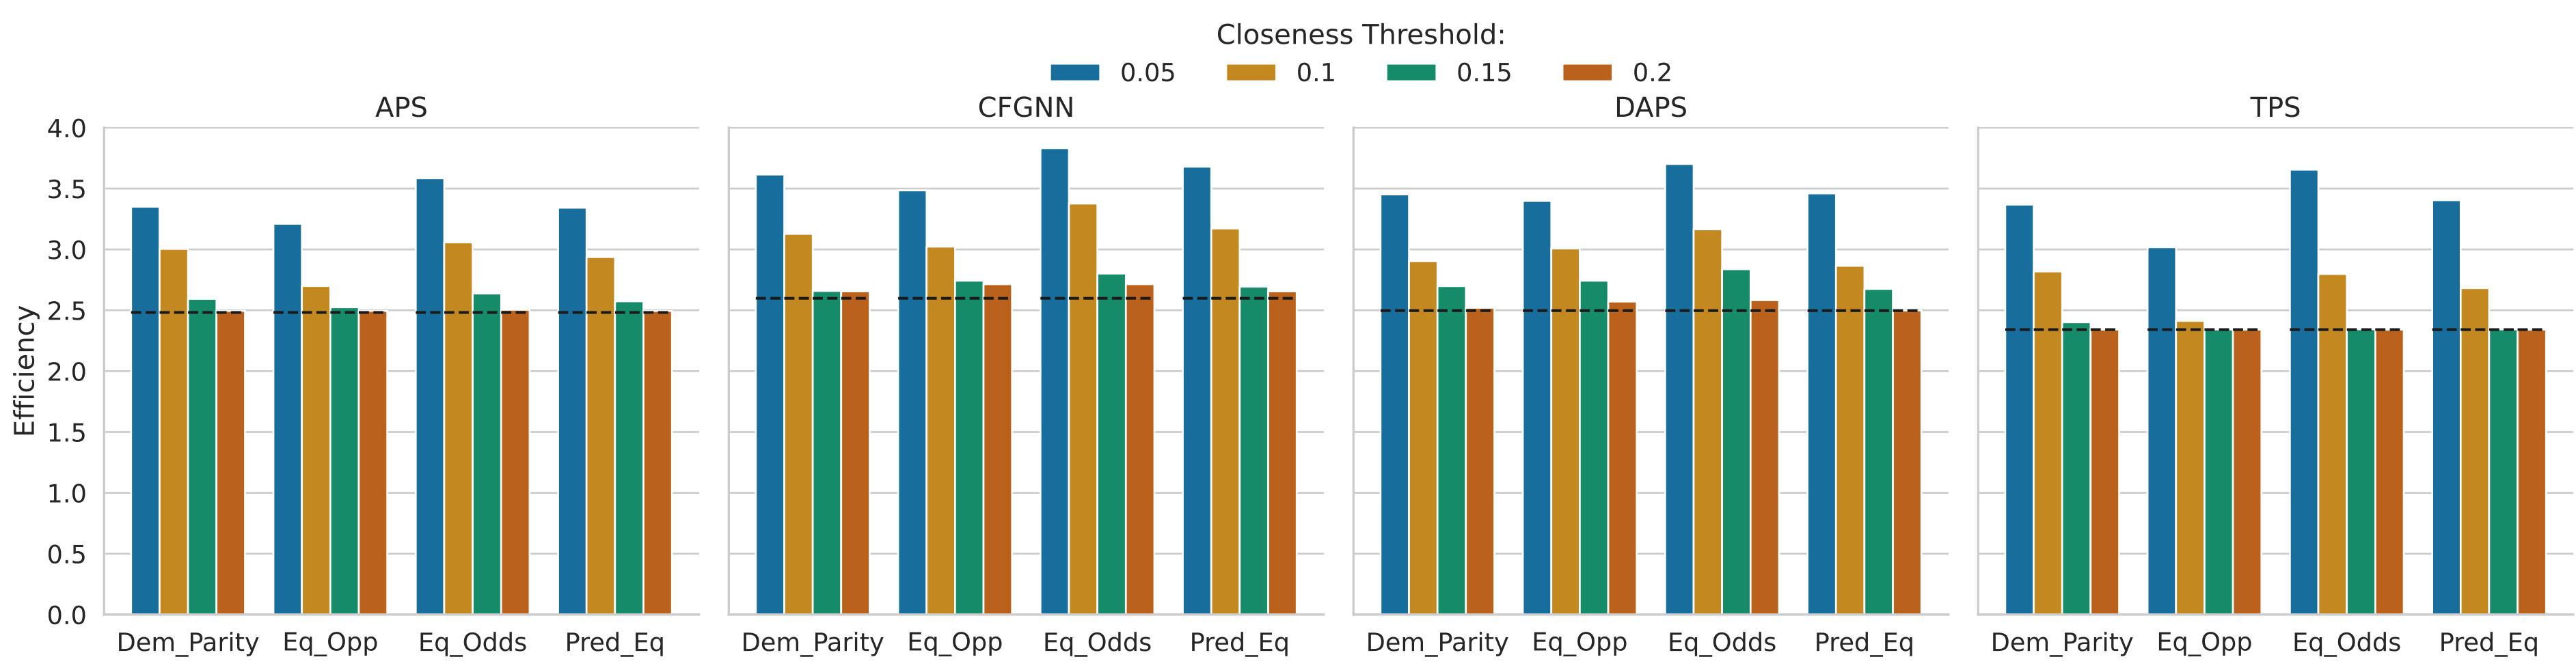

Supplement: supplementary_material [file attachment]

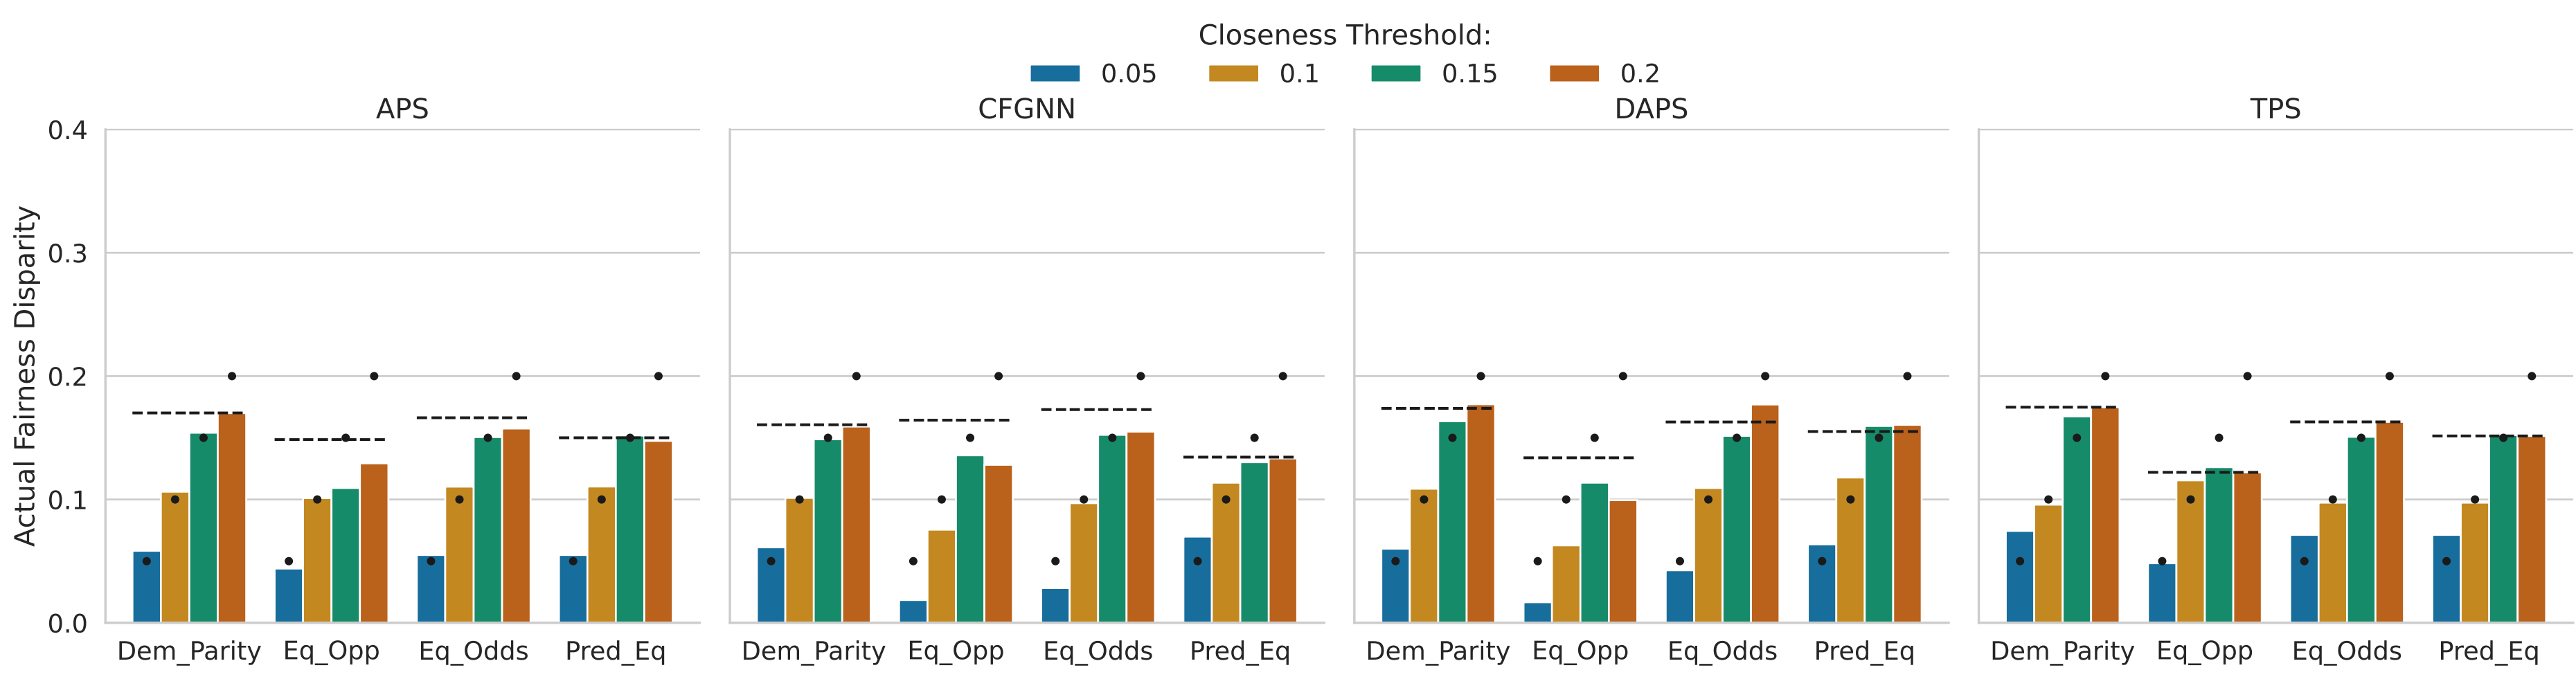

Supplement: supplementary_material [file attachment]

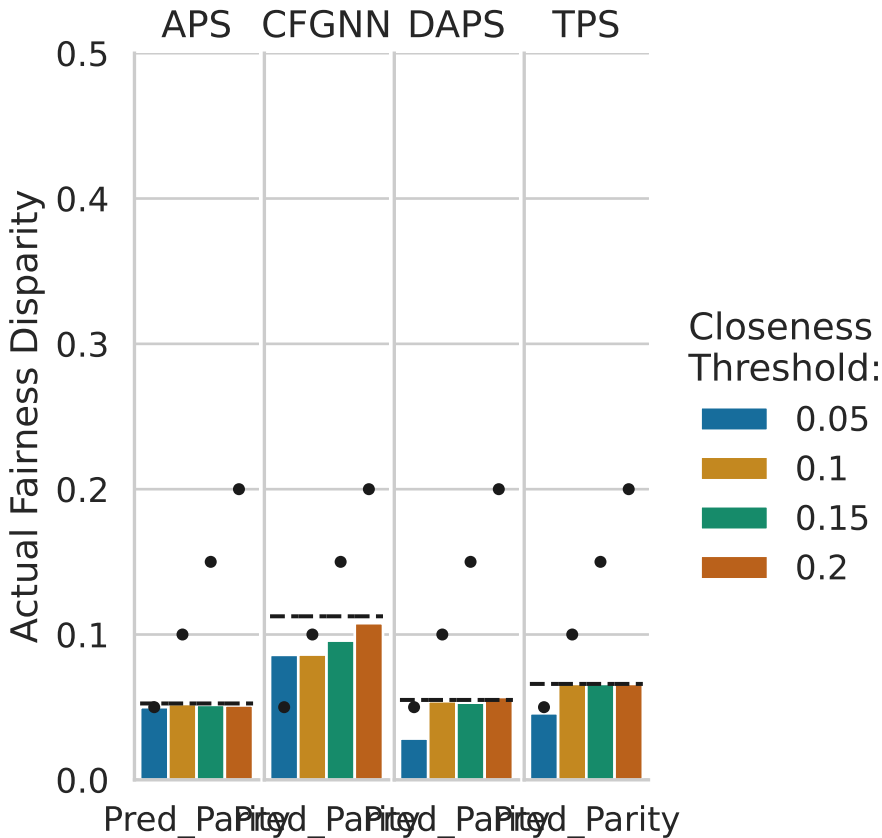

Supplement: supplementary_material [file attachment]

Closeness Threshold:

0.05

0.1

0.15

0.2

CFGNN

DAPS

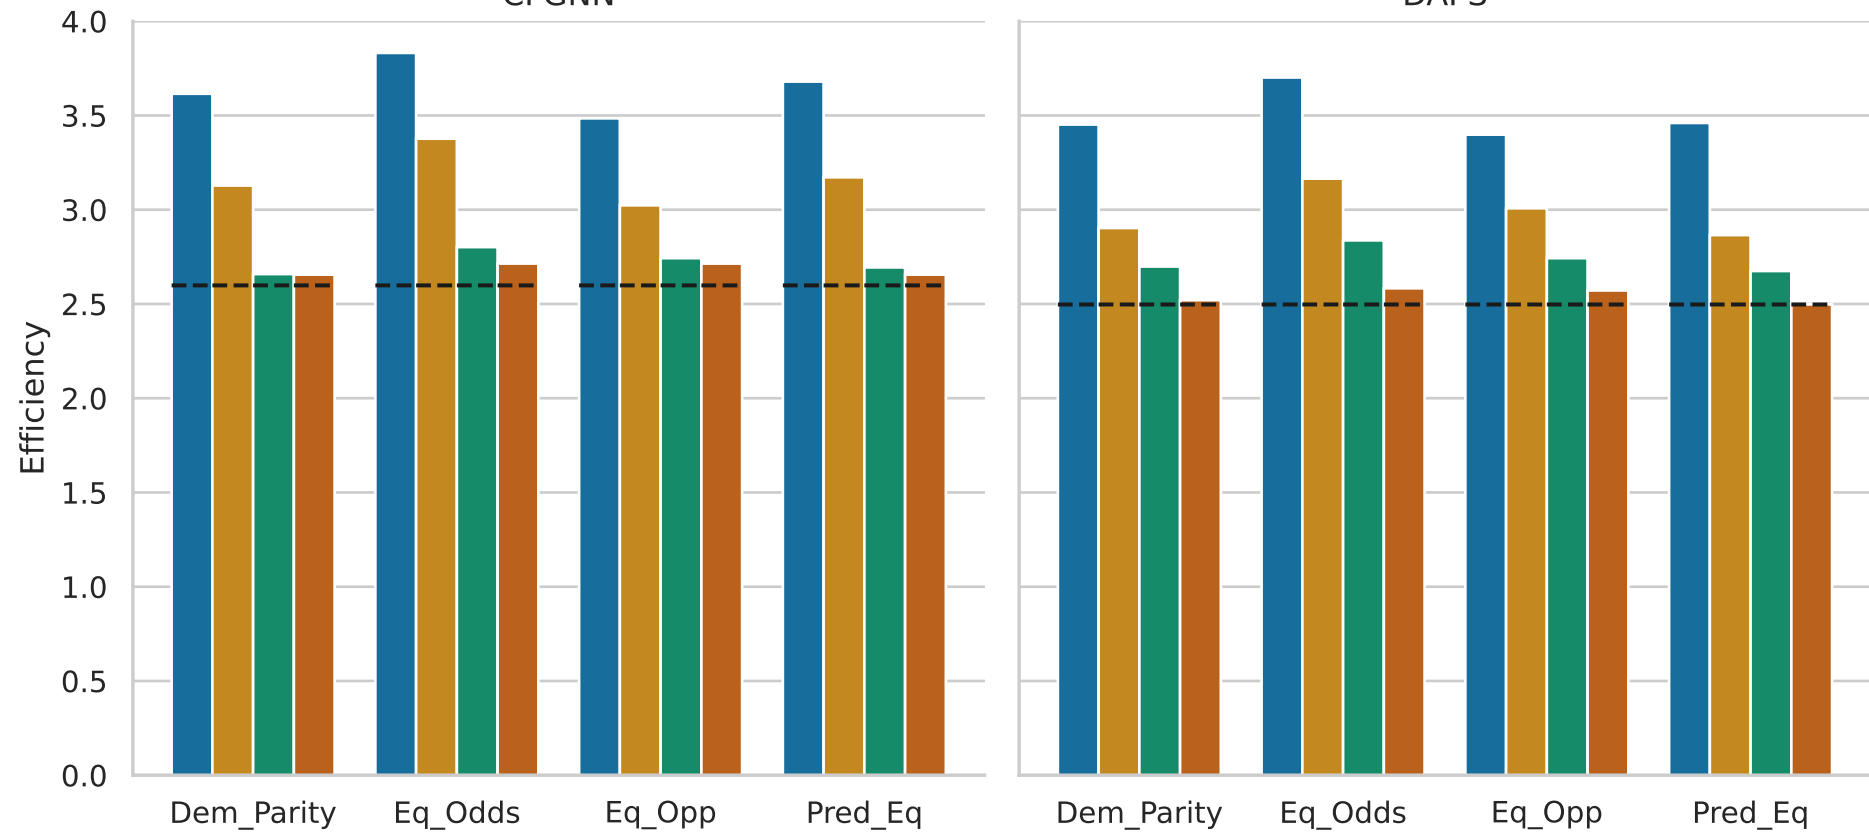

Supplement: supplementary_material [file attachment]

Closeness Threshold:

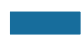

0.05

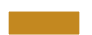

0.1

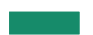

0.15

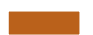

0.2

APS

TPS

Actual Fairness Disparity

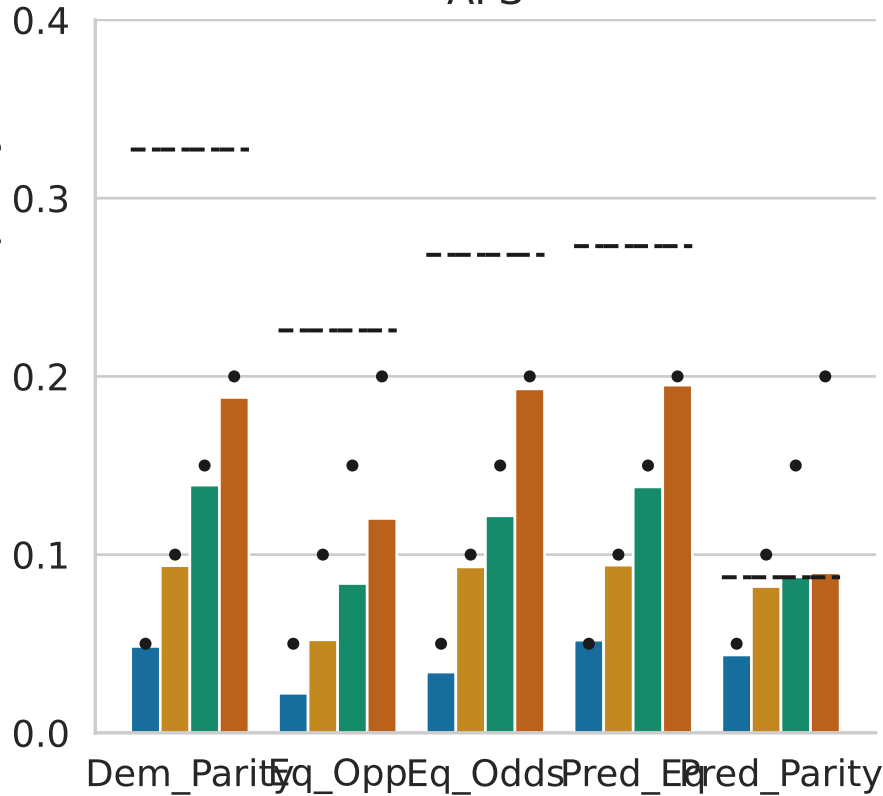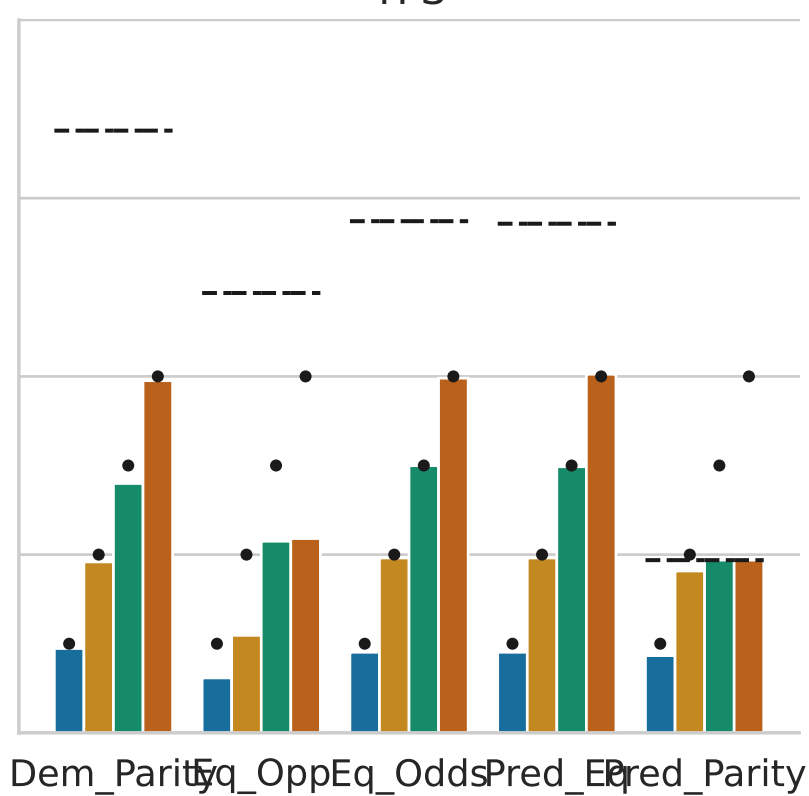

Supplement: supplementary_material [file attachment]

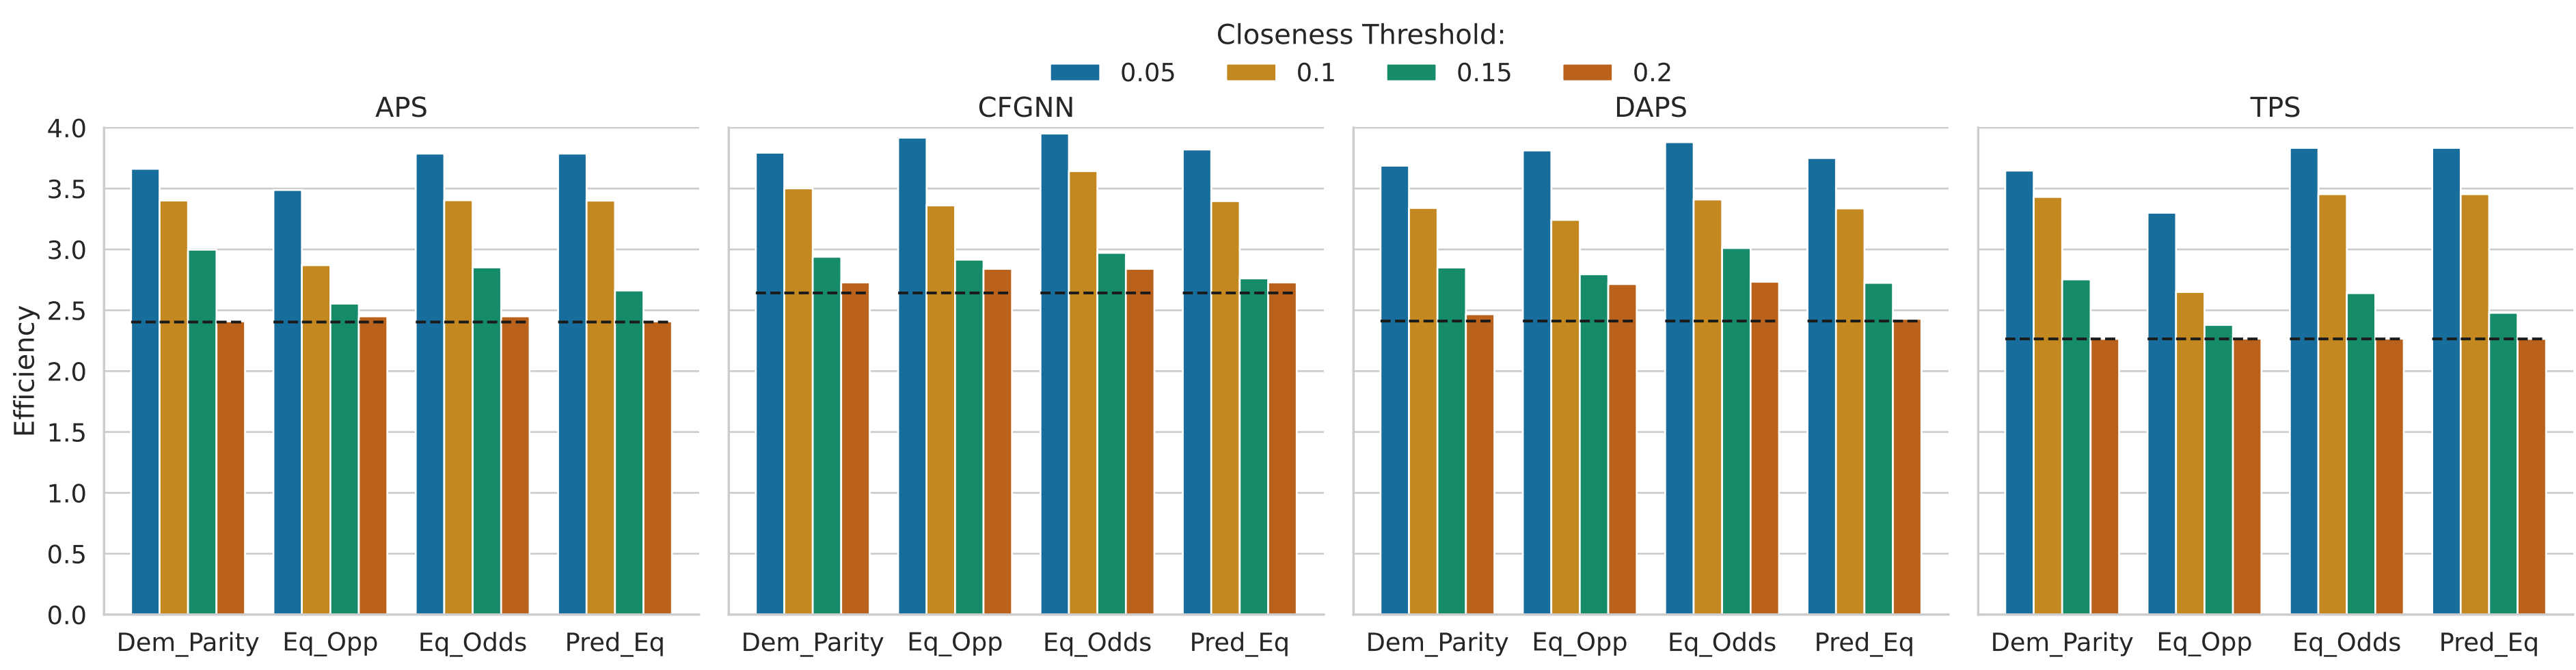

Supplement: supplementary_material [file attachment]

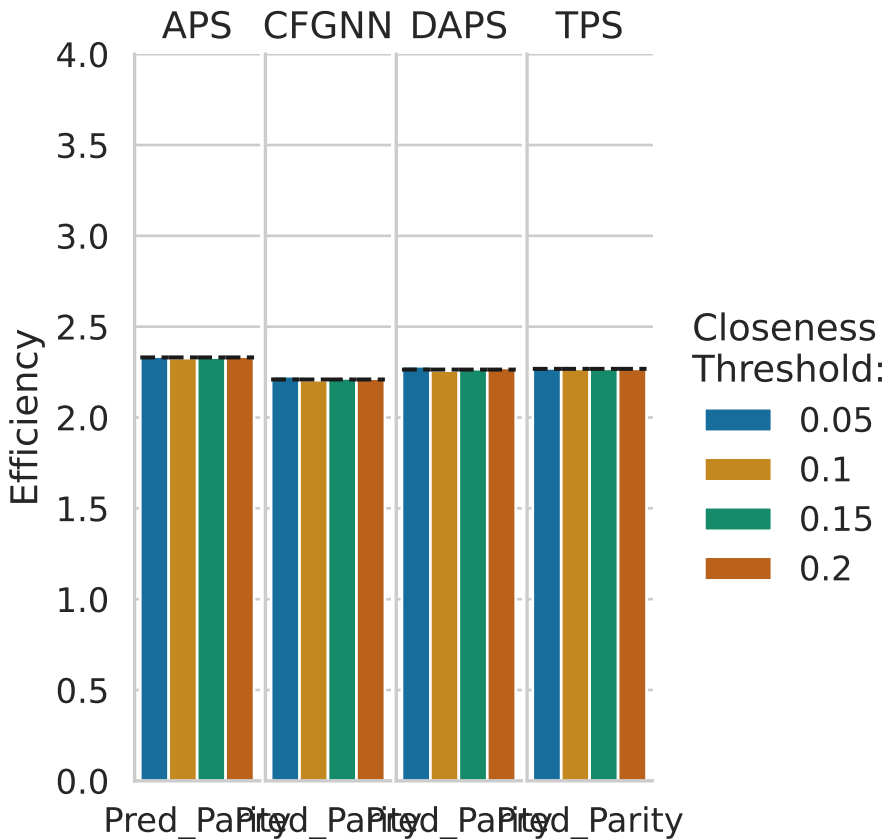

Supplement: supplementary_material [file attachment]

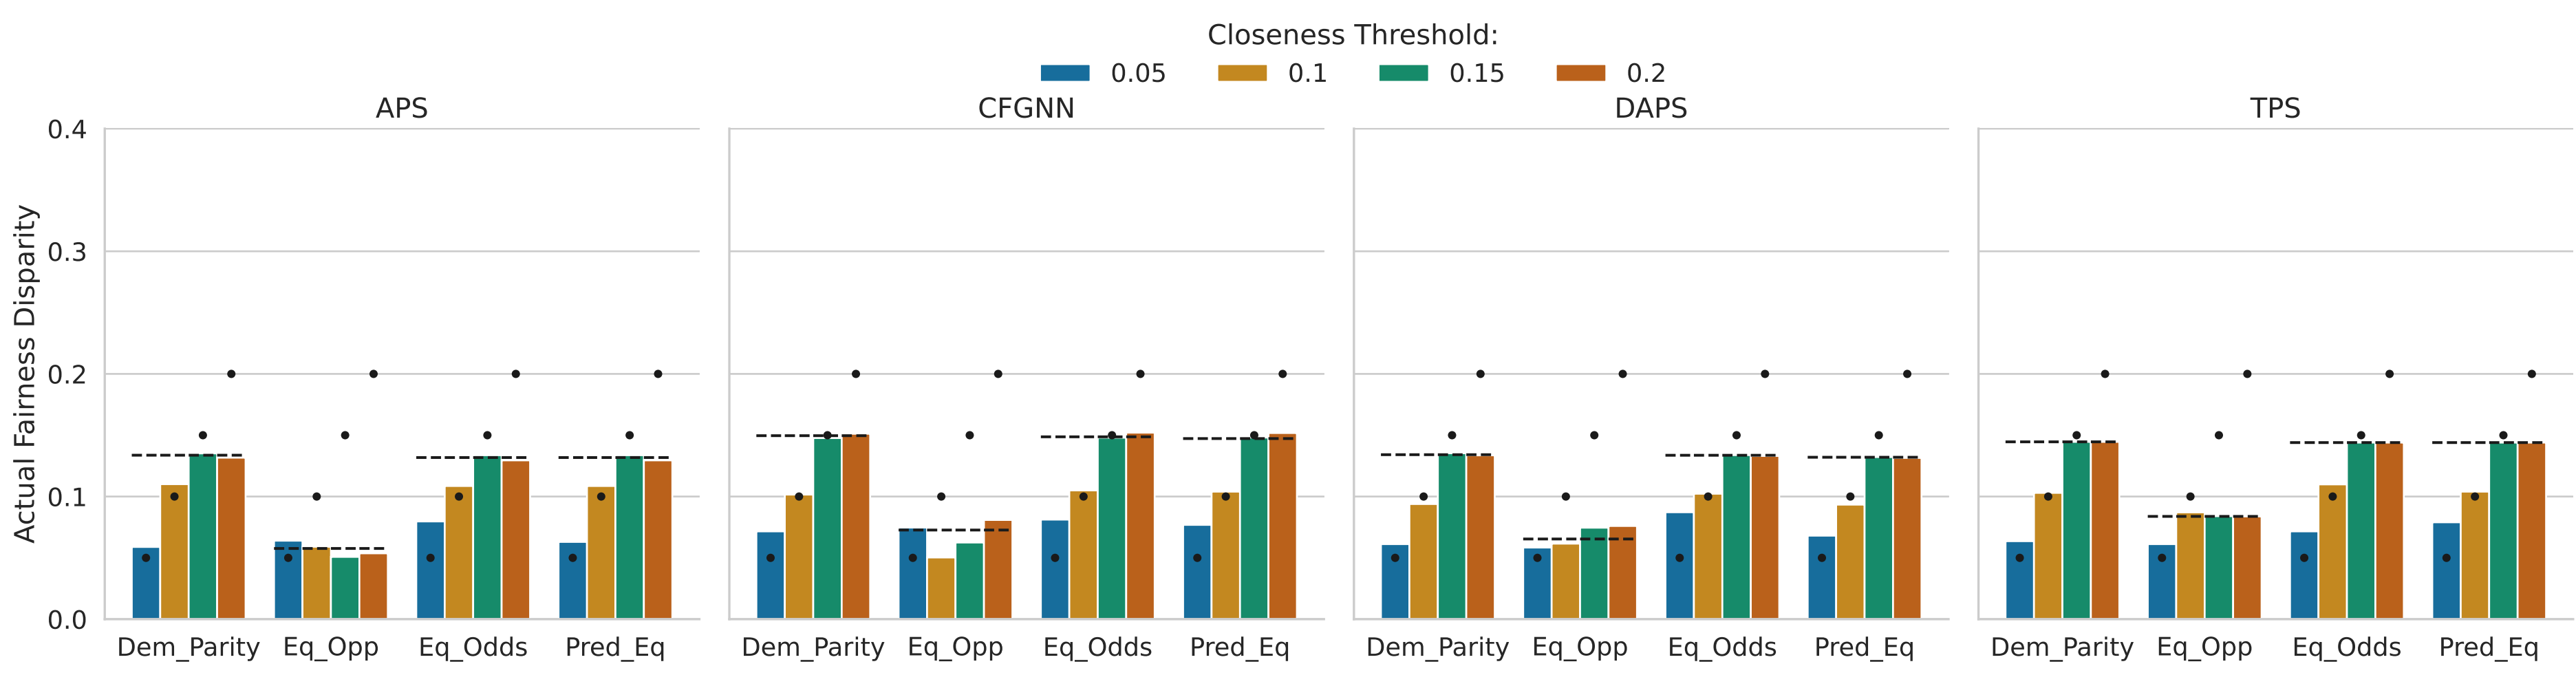

Supplement: supplementary_material [file attachment]

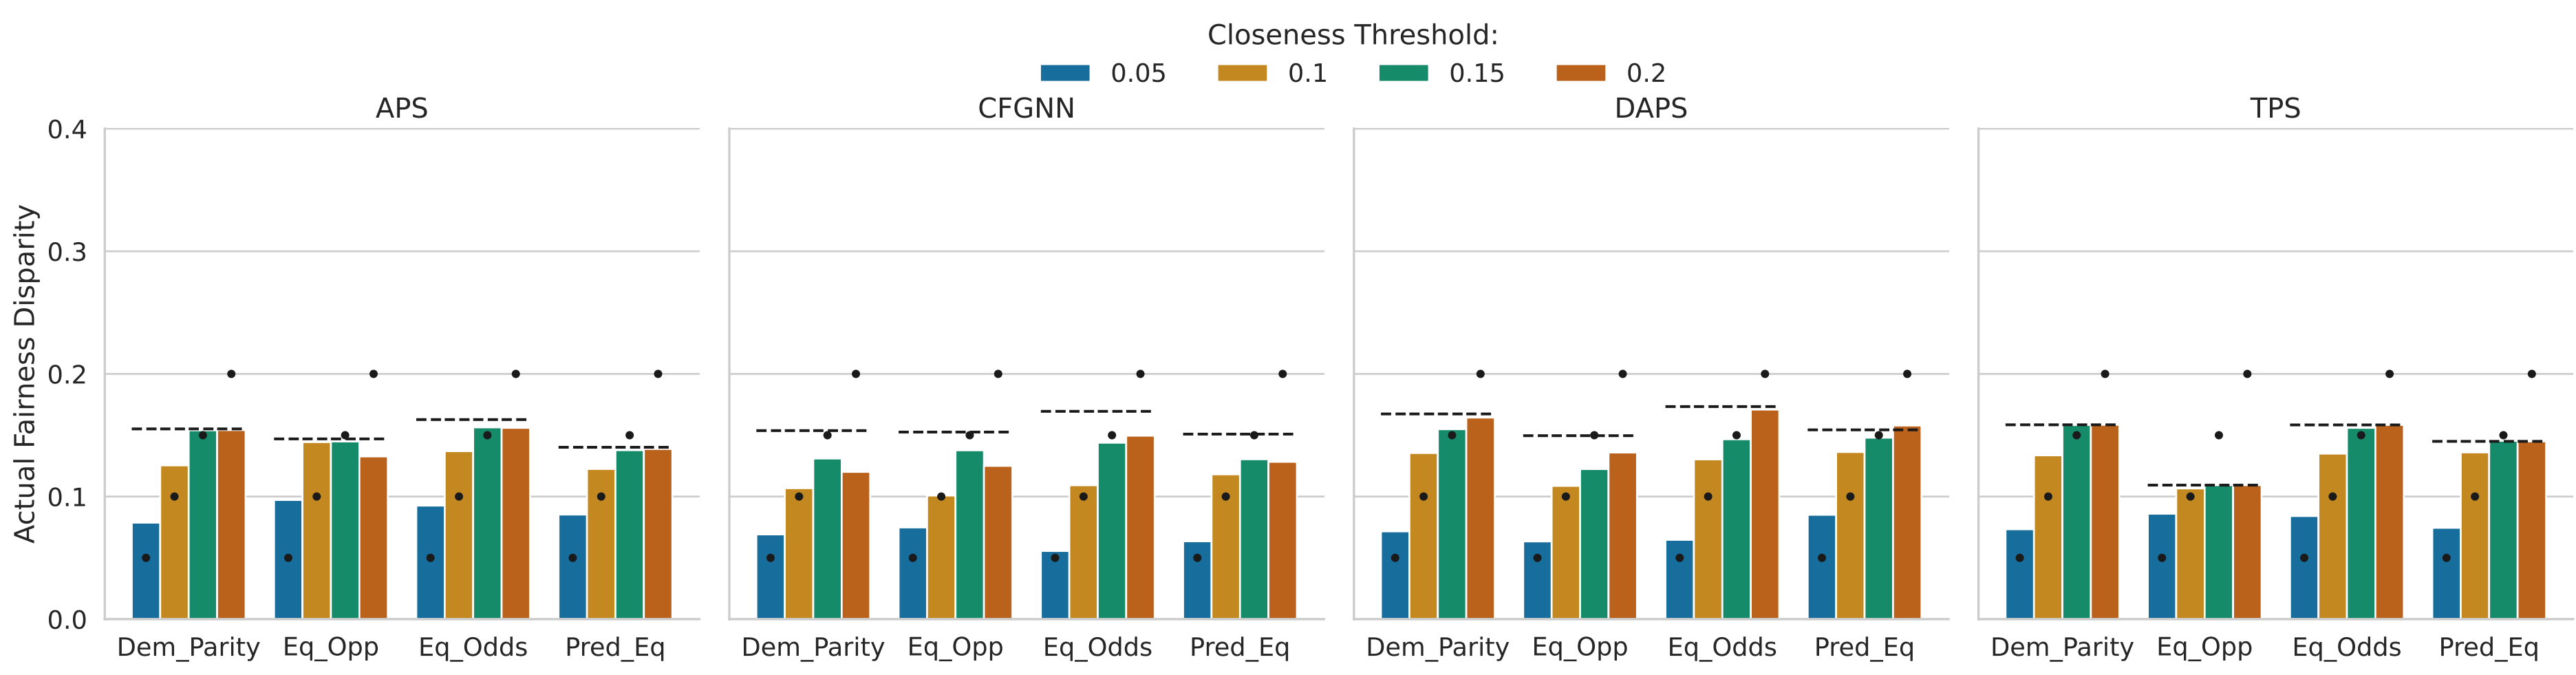

Supplement: supplementary_material [file attachment]

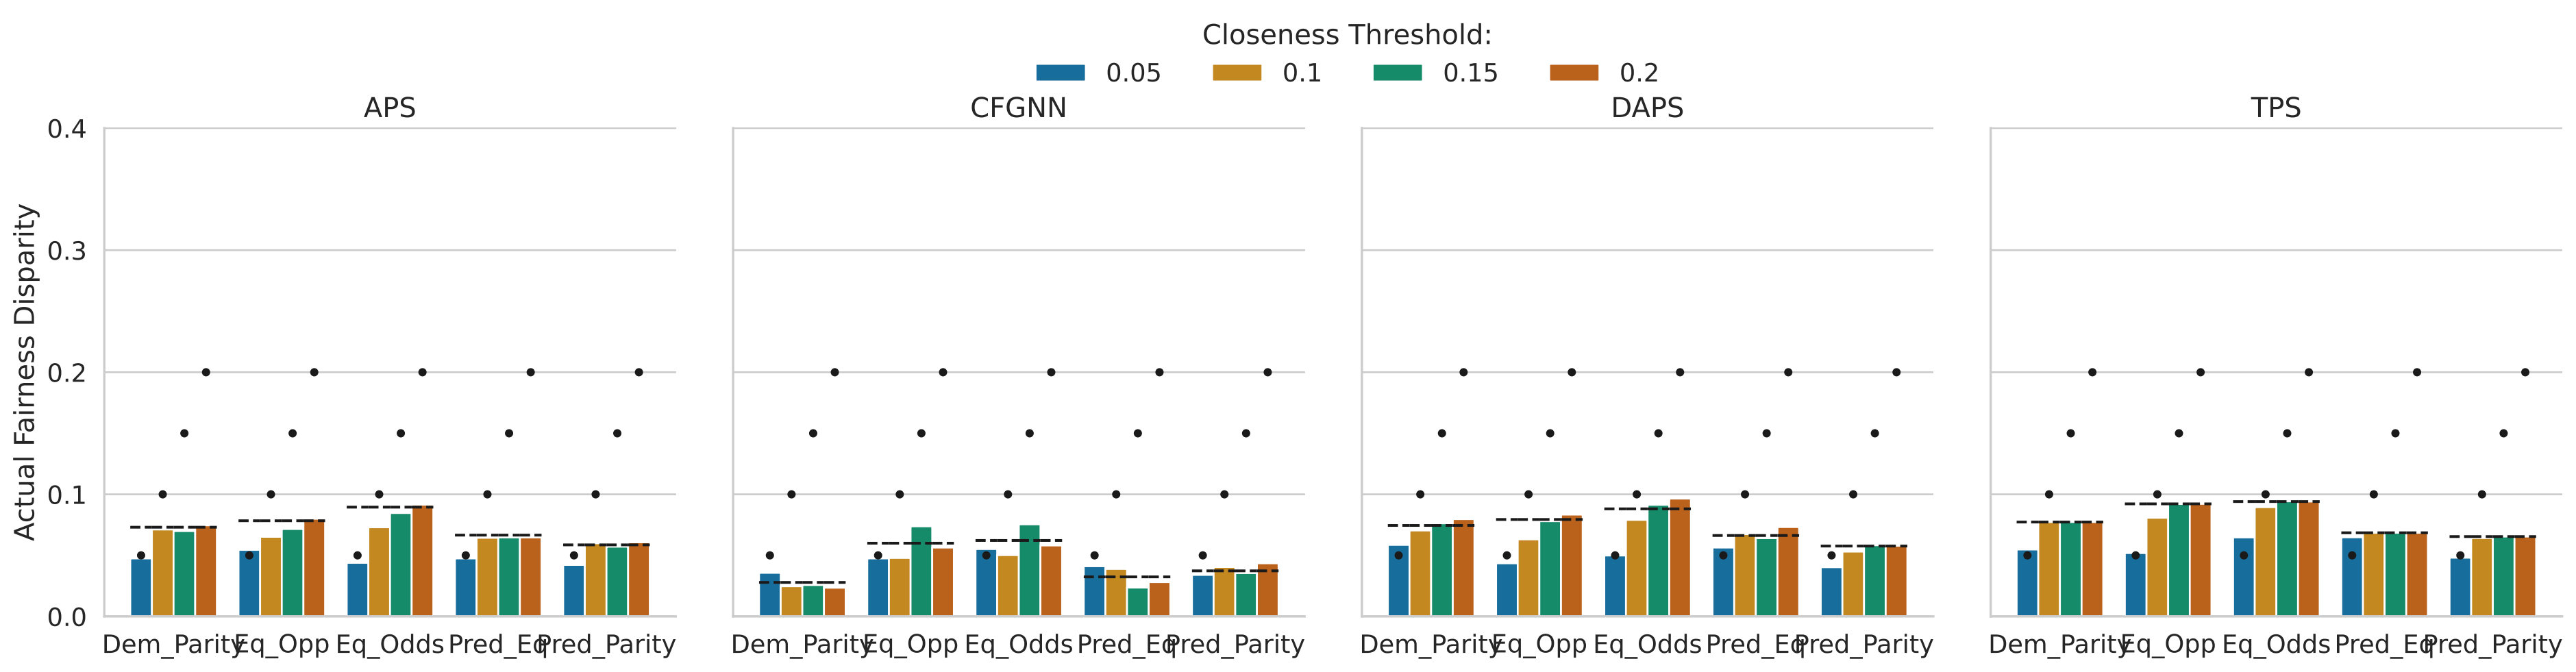

Supplement: supplementary_material [file attachment]

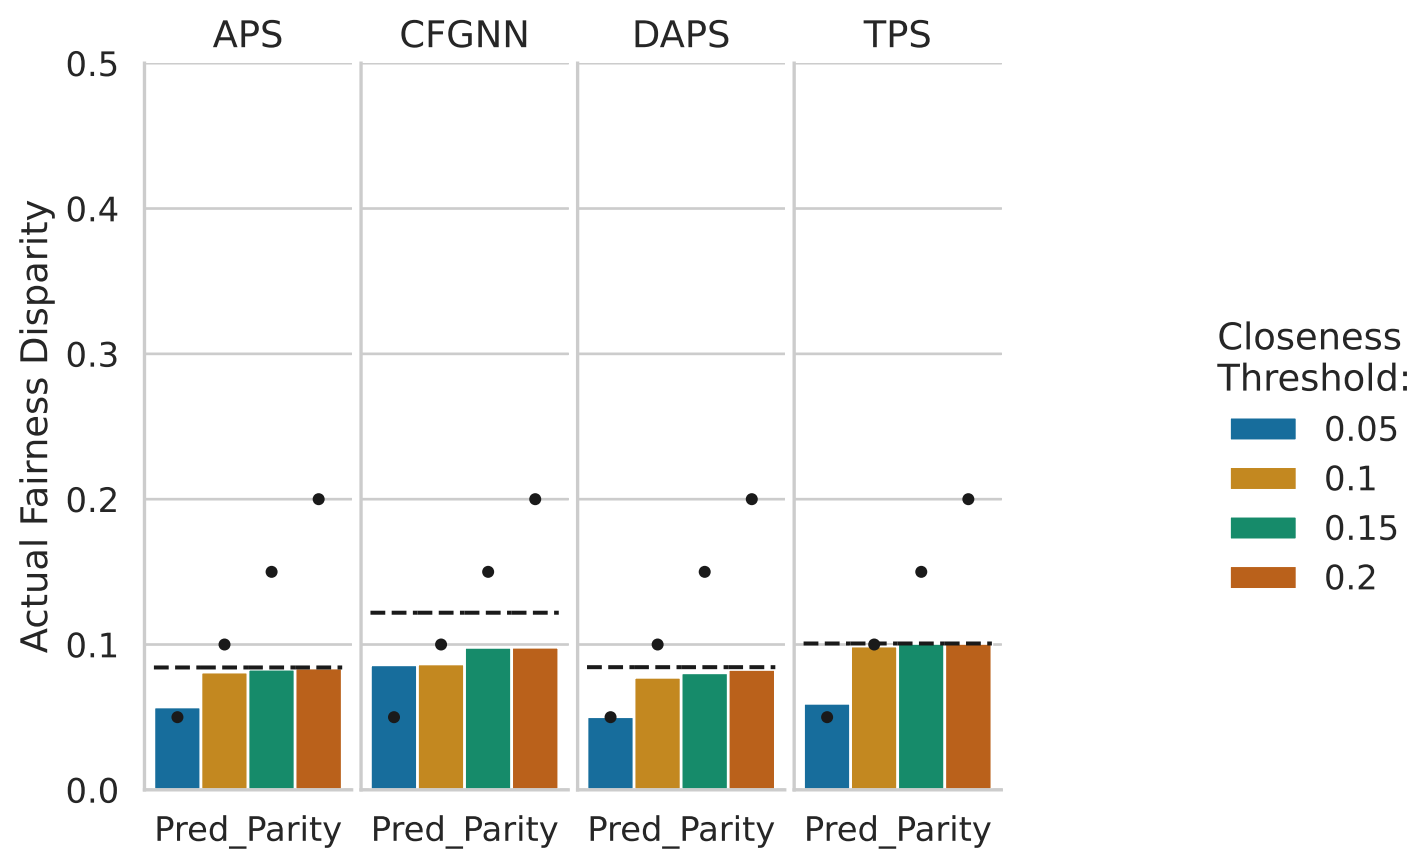

Supplement: supplementary_material [file attachment]

Closeness Threshold:

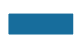

0.05

0.1

0.15

0.2

APS

CFGNN

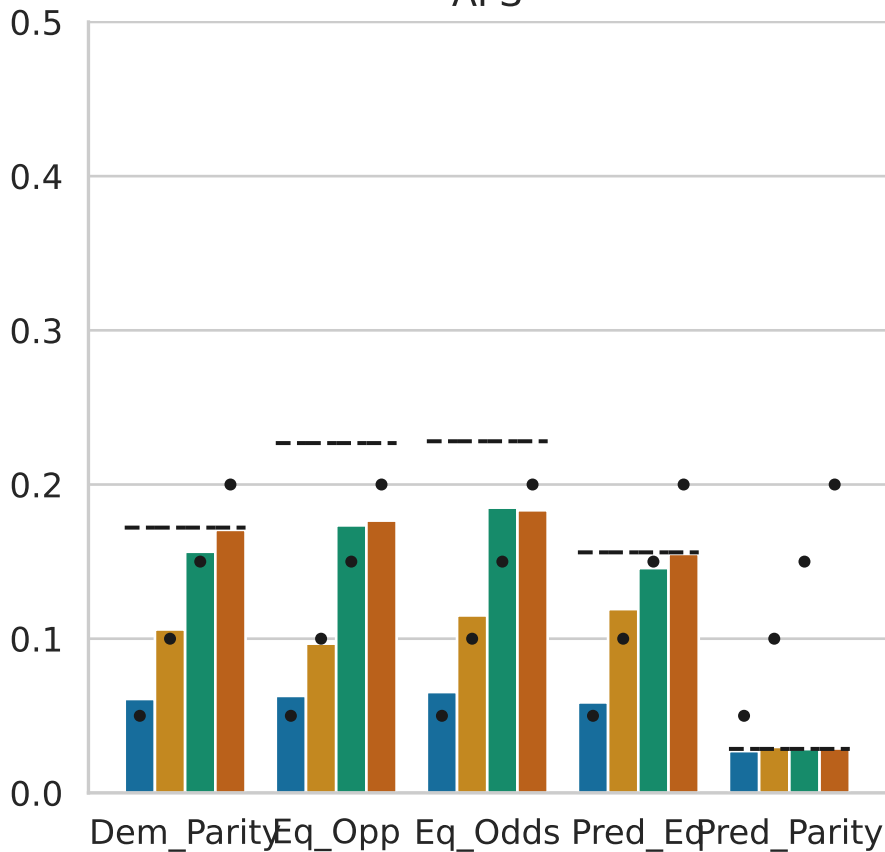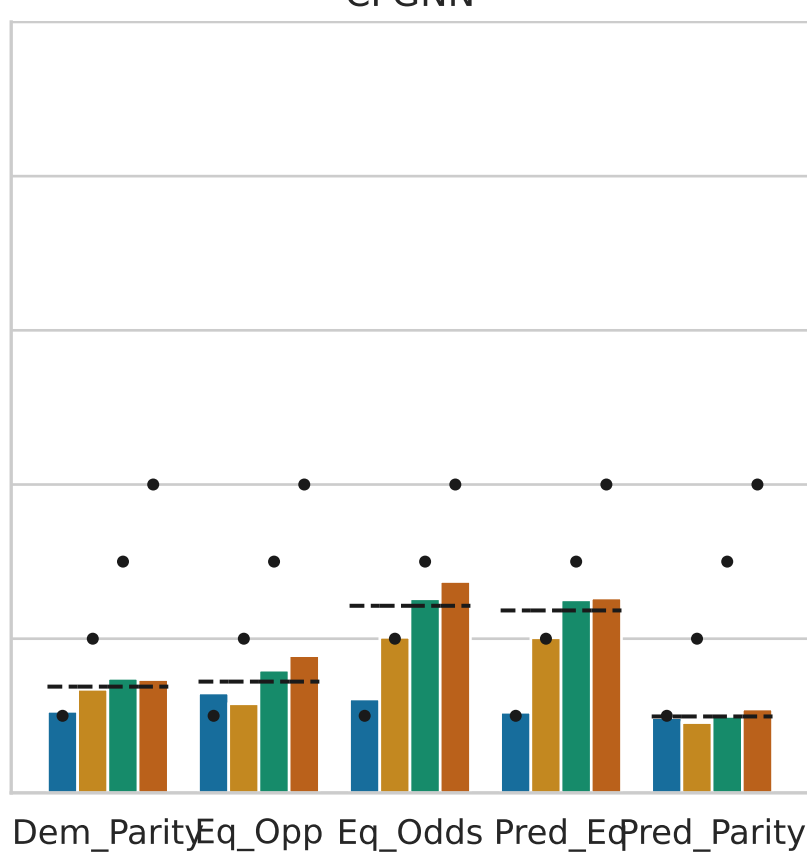

DAPS

TPS

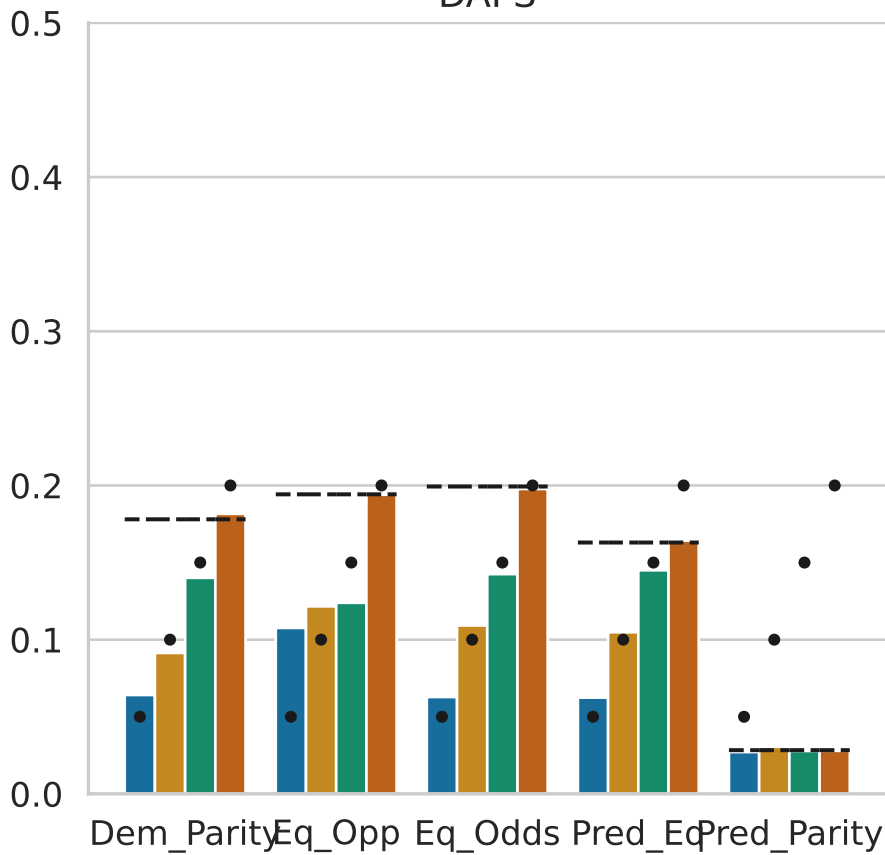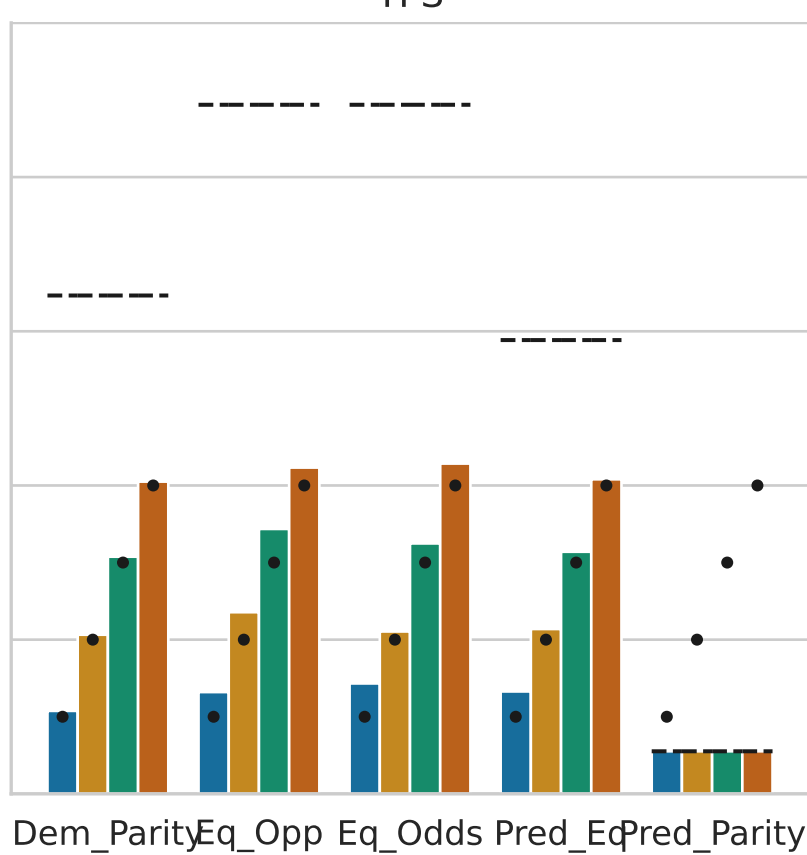

Supplement: supplementary_material [file attachment]

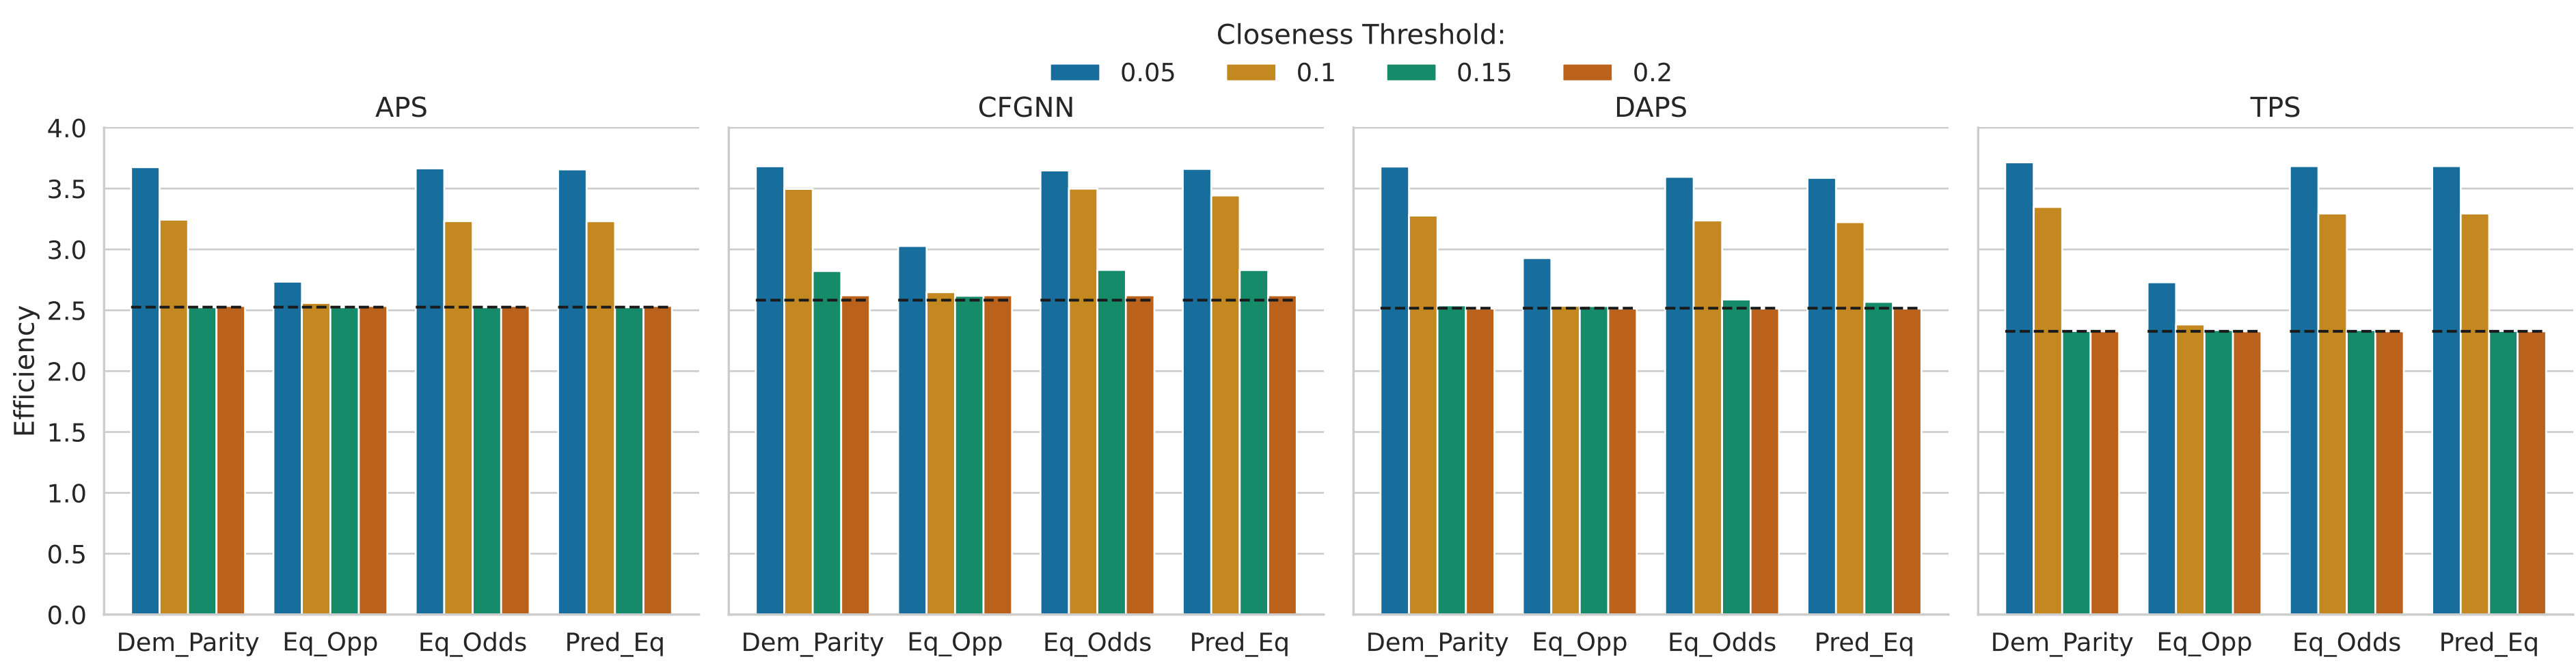

Supplement: supplementary_material [file attachment]

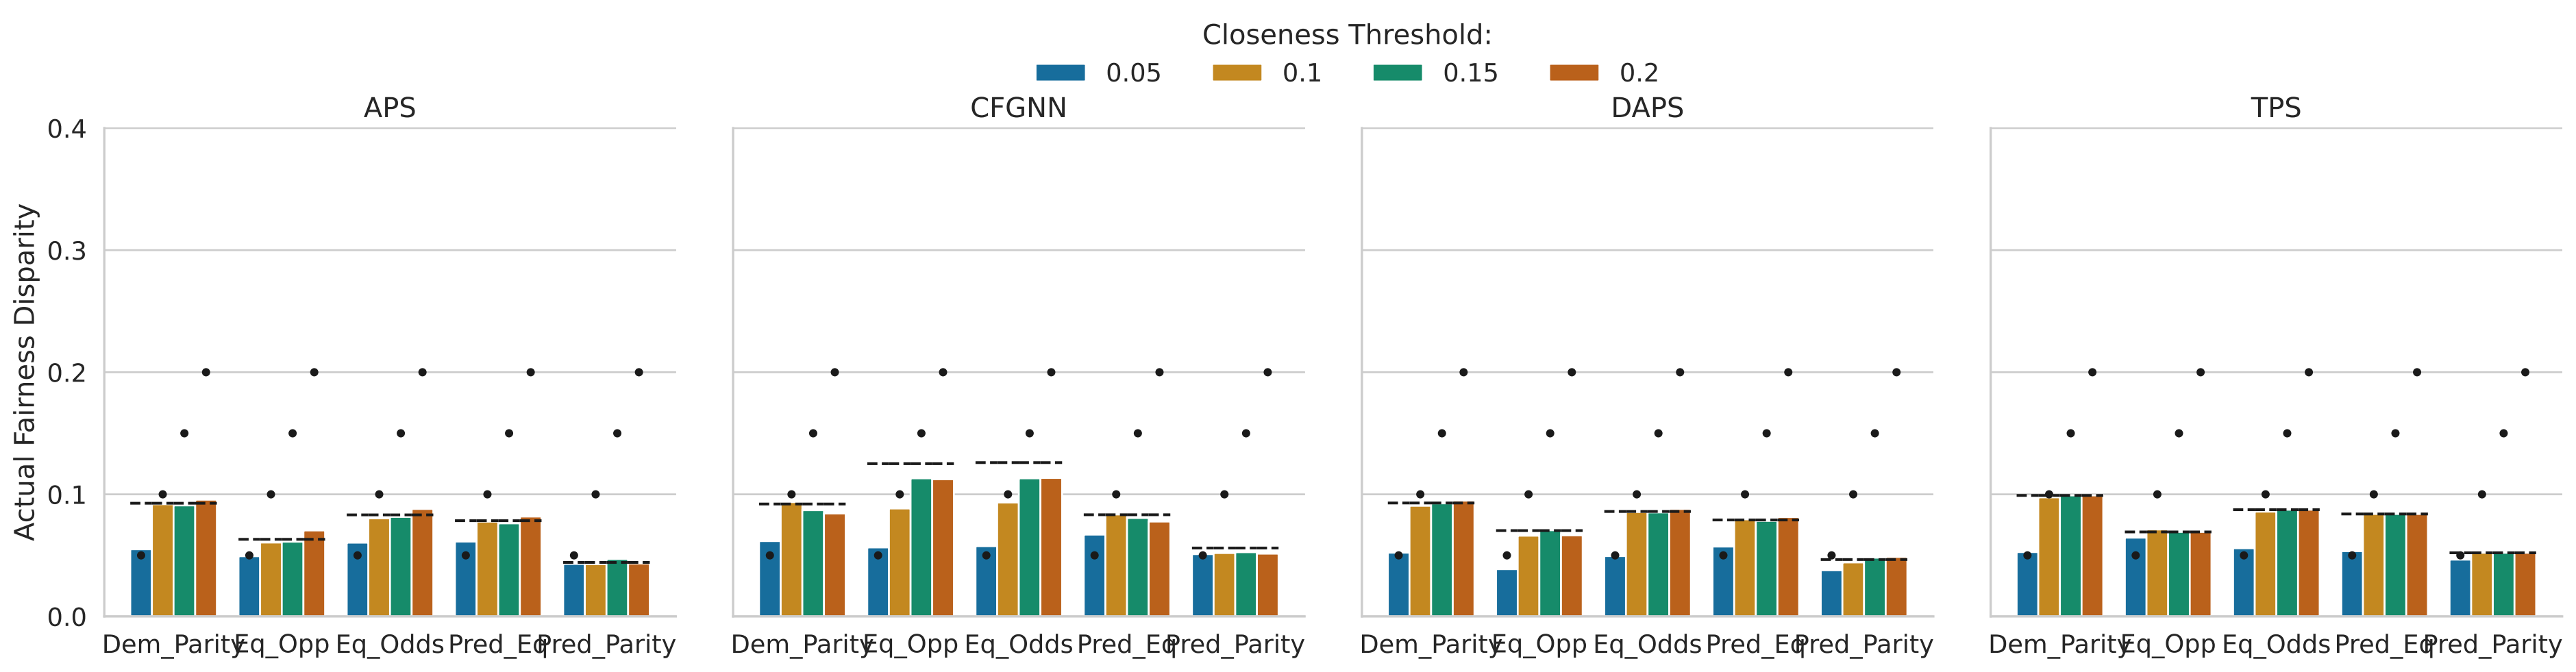

Supplement: supplementary_material [file attachment]

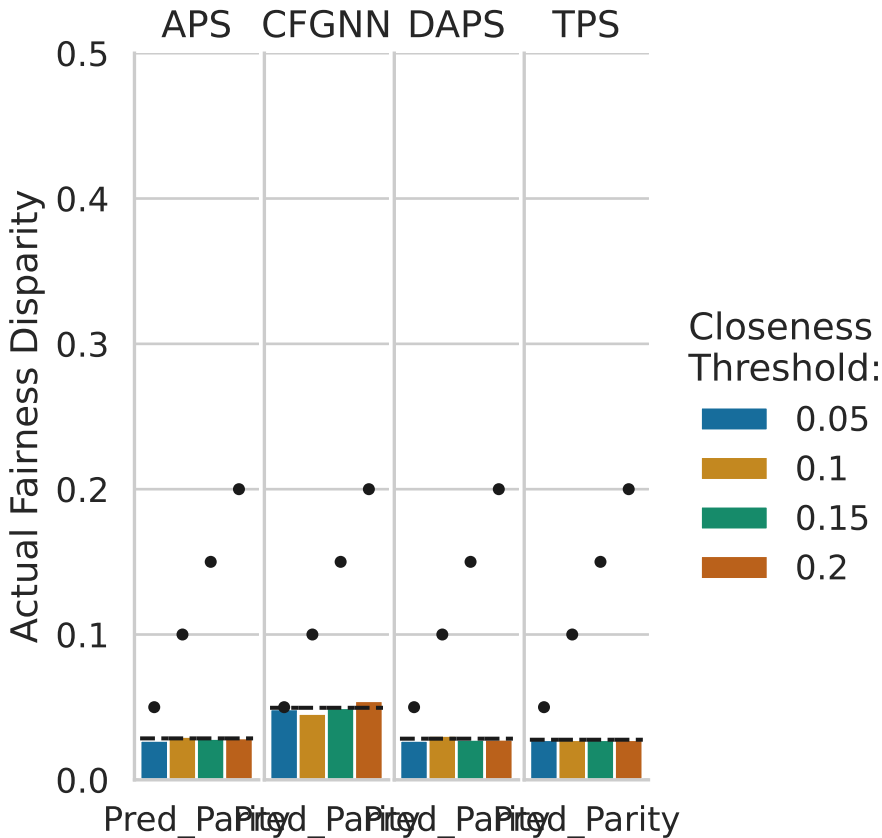

Supplement: supplementary_material [file attachment]

Closeness Threshold:

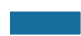

0.05

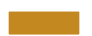

0.1

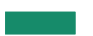

0.15

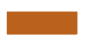

0.2

APS

TPS

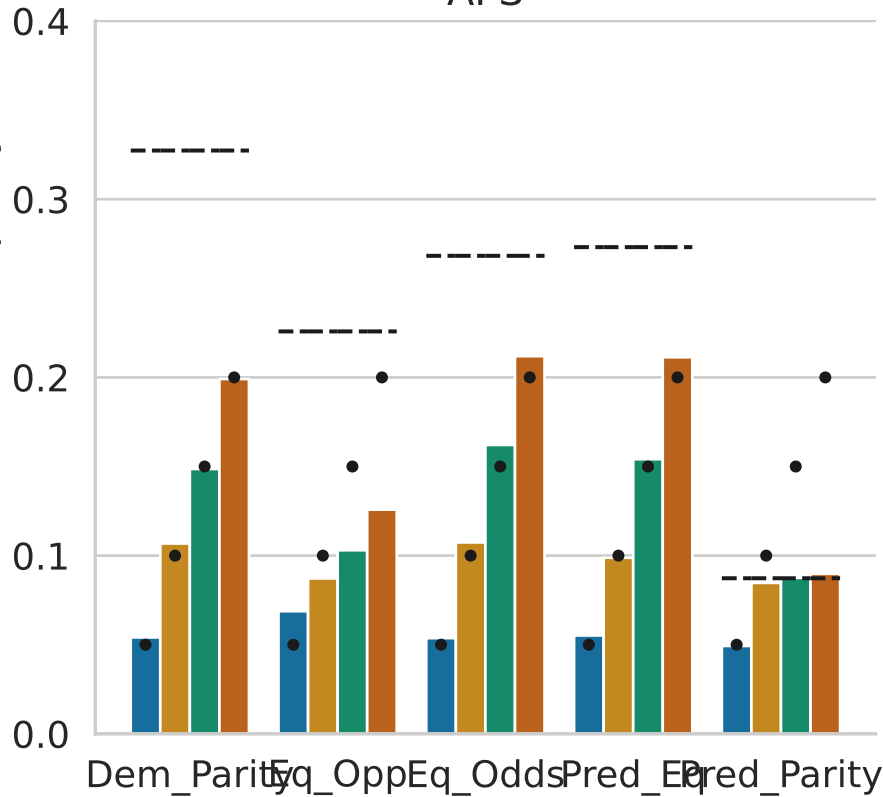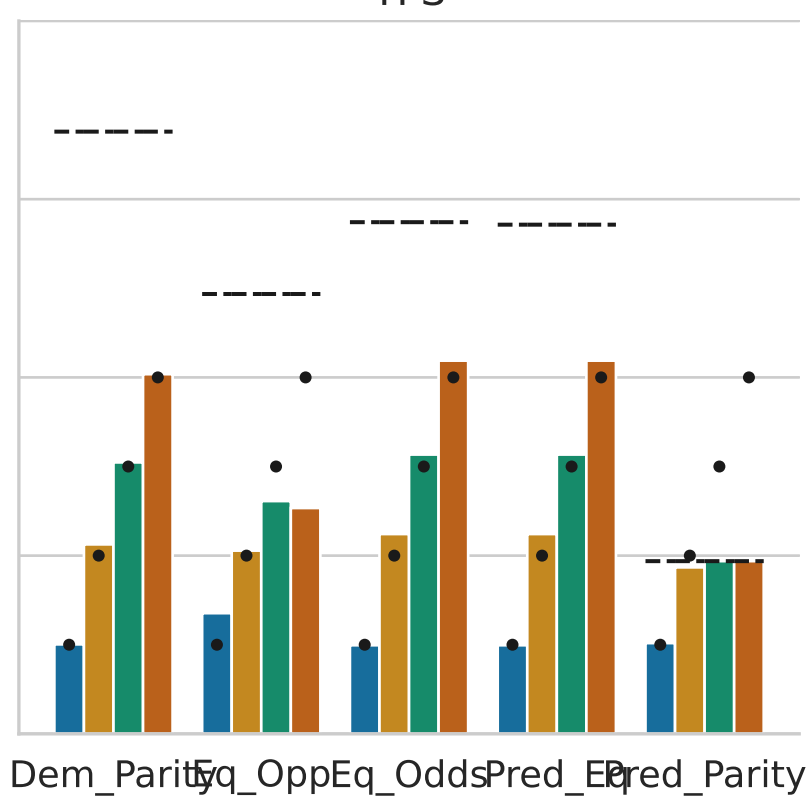

Supplement: supplementary_material [file attachment]

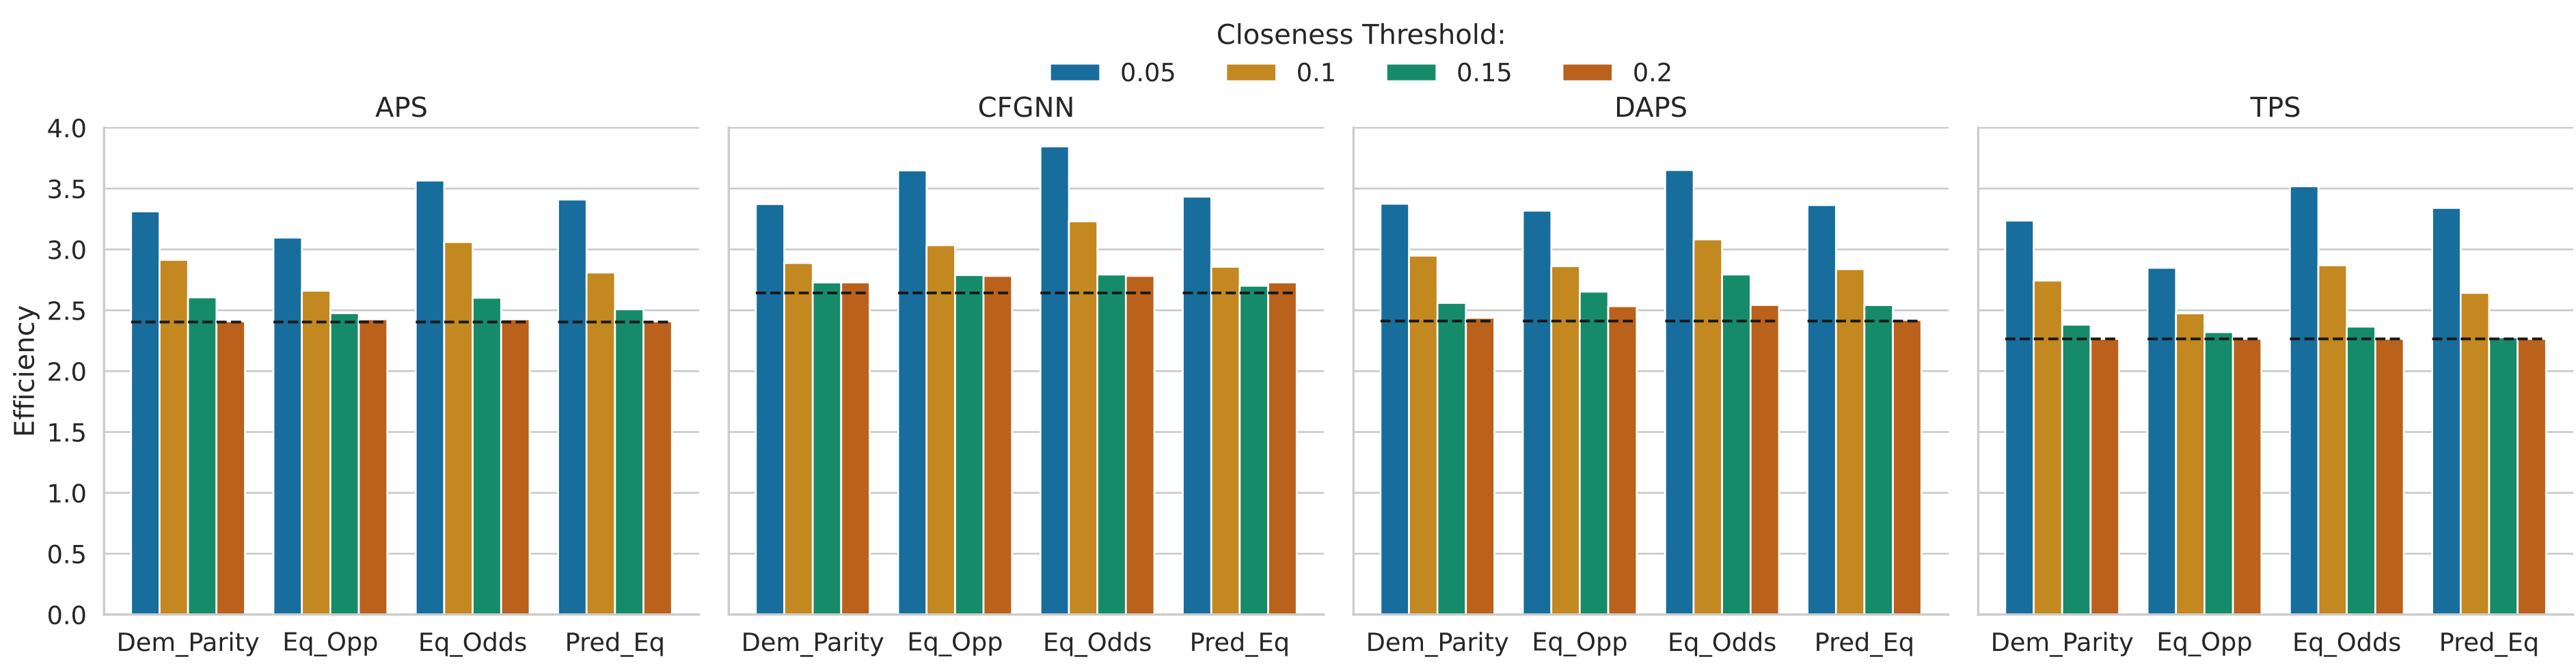

Supplement: supplementary_material [file attachment]

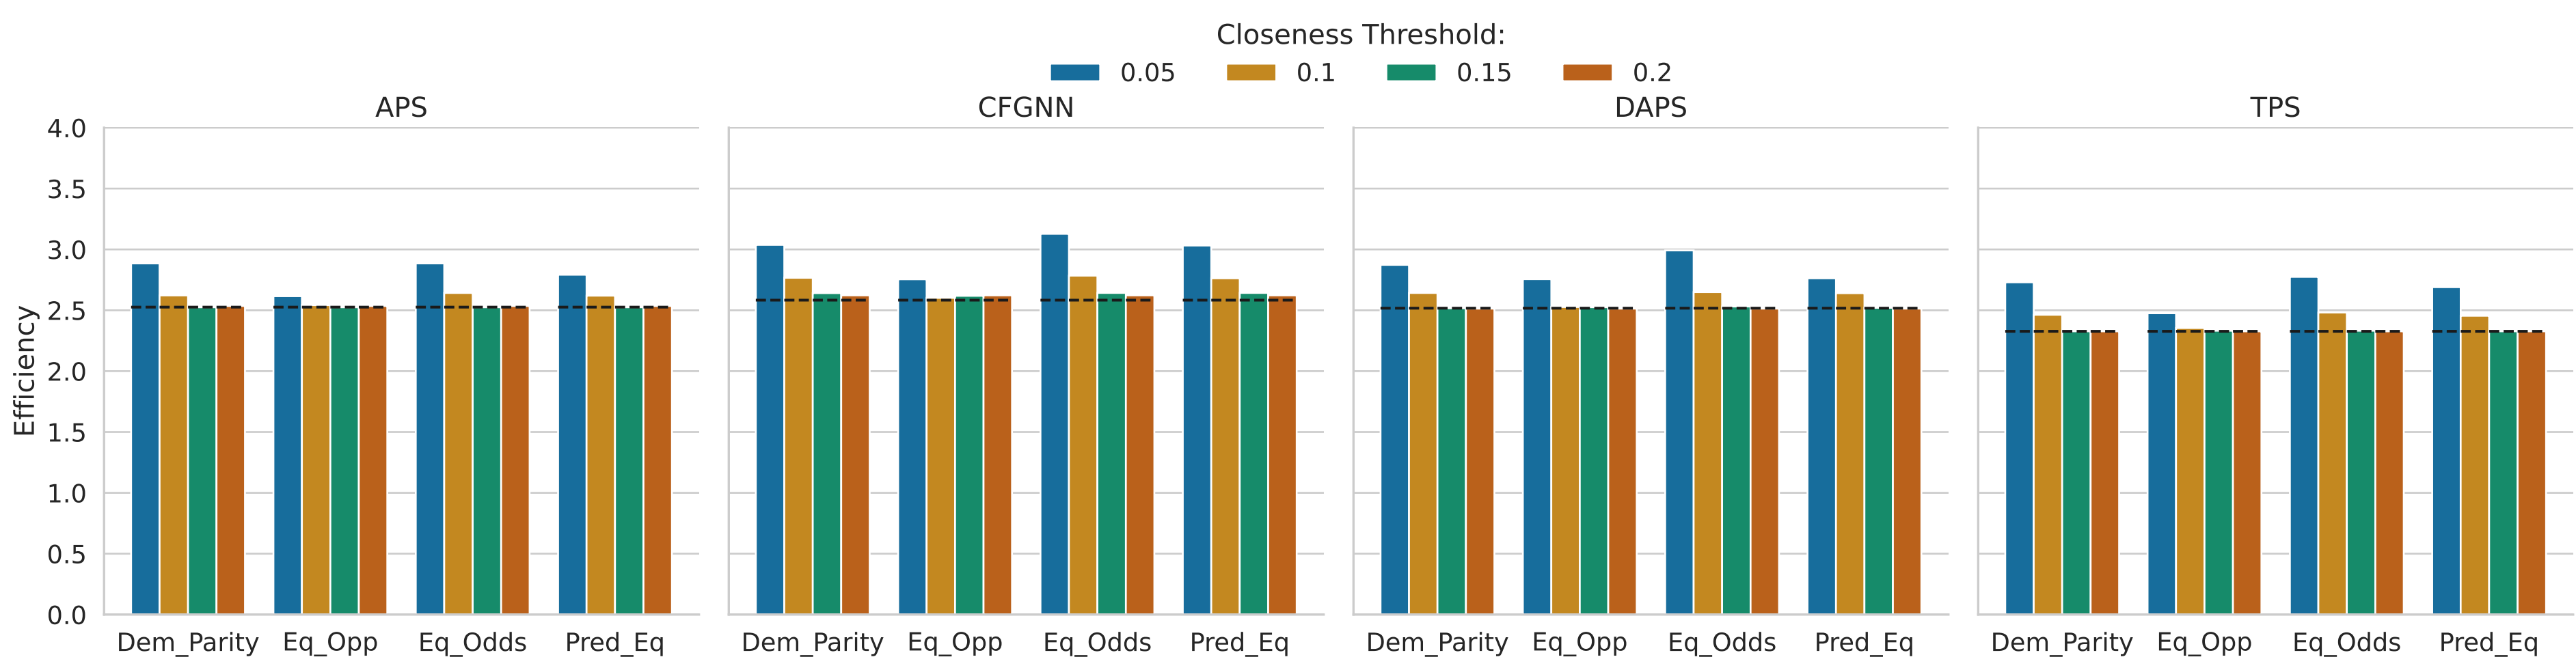

Supplement: supplementary_material [file attachment]

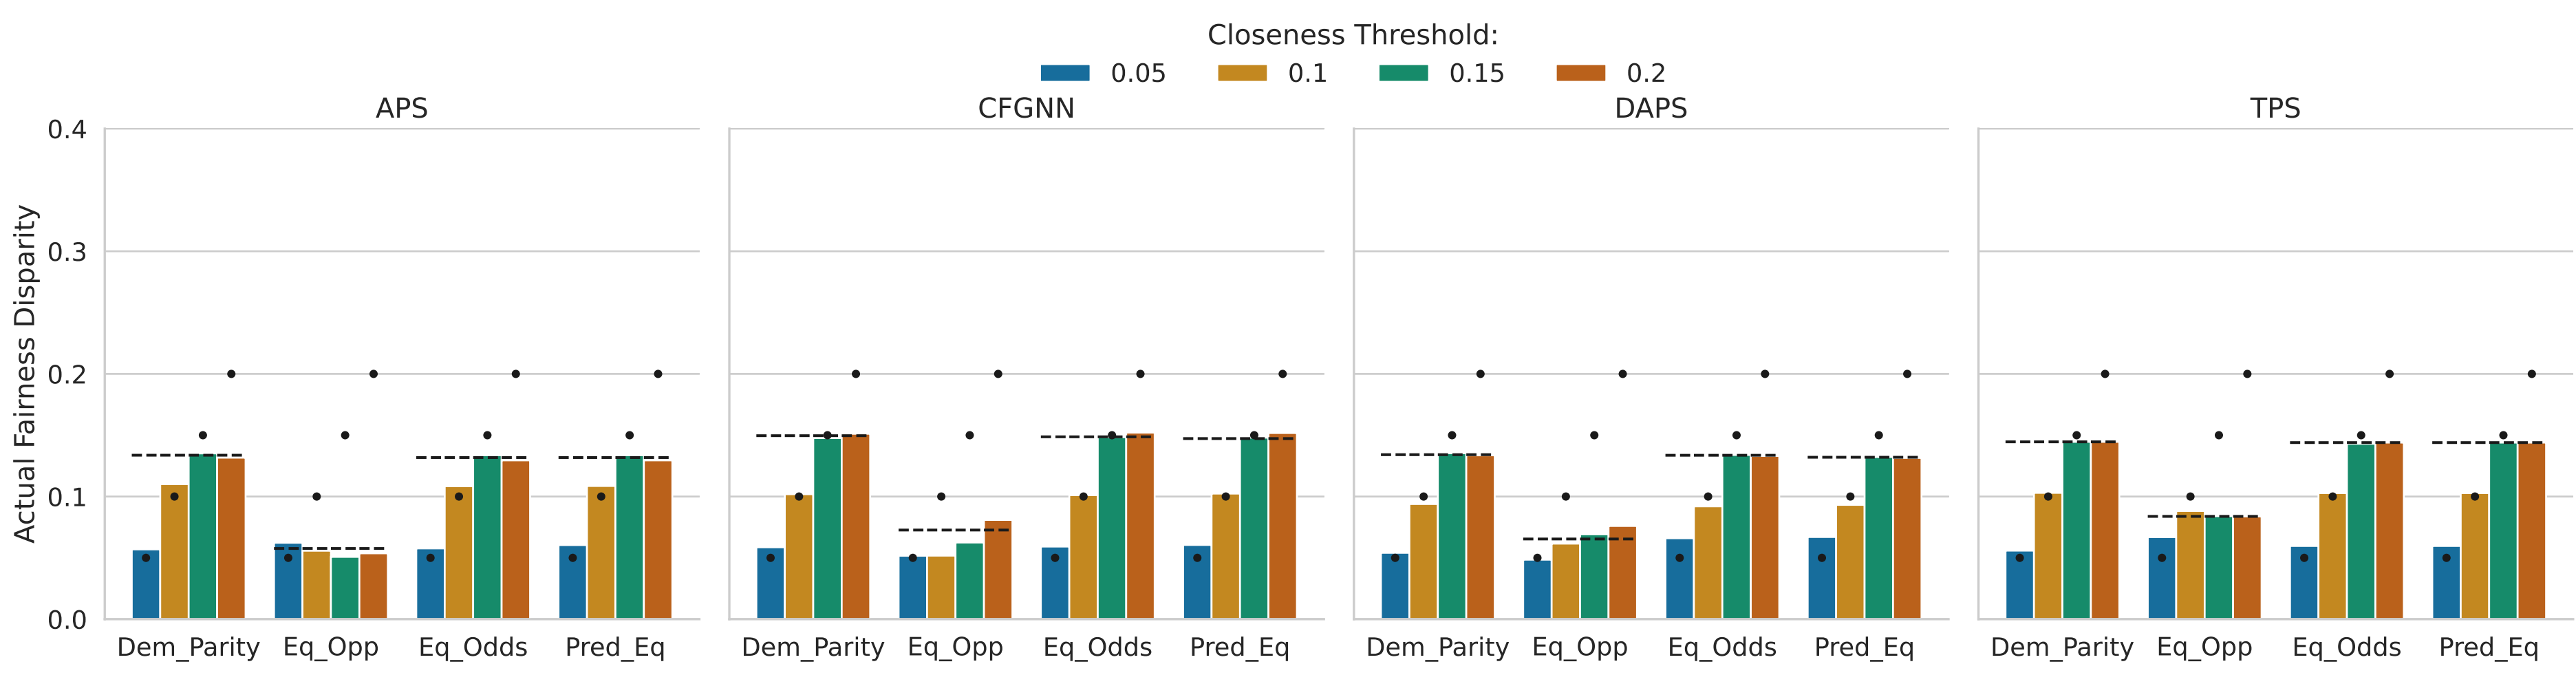

Supplement: supplementary_material [file attachment]

Closeness Threshold:

0.05

0.1

0.15

0.2

CFGNN

DAPS

Actual Fairness Disparity

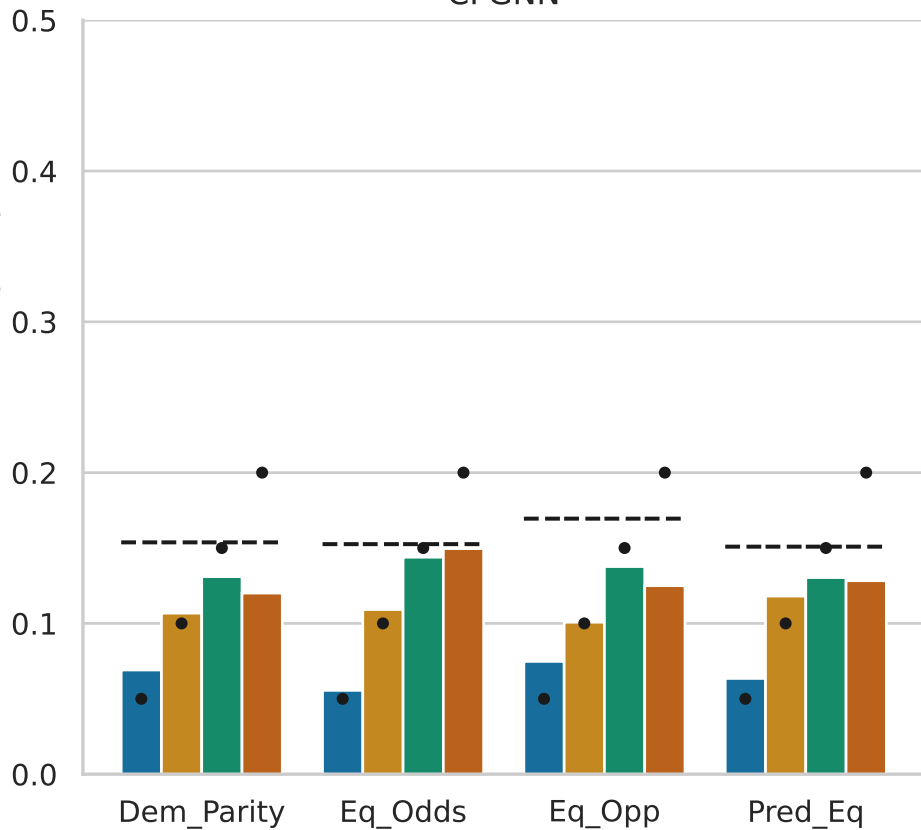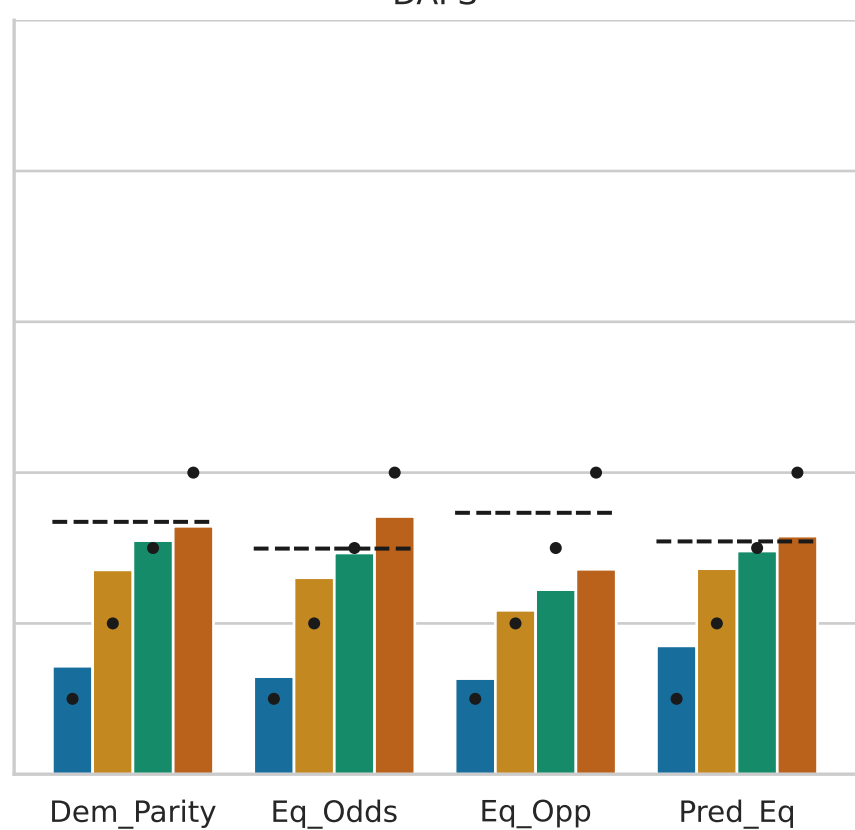

Supplement: supplementary_material [file attachment]

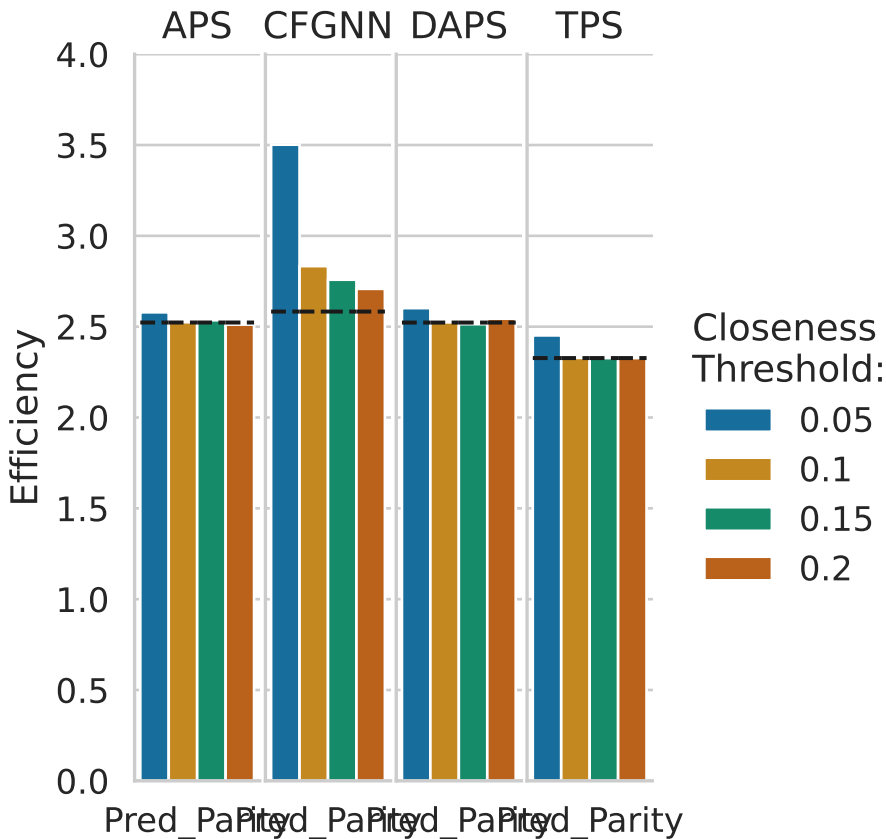

Supplement: supplementary_material [file attachment]
